## A cross-species proteomic map reveals neoteny of human synapse development

**Authors:** Li Wang<sup>1,2\*</sup>, Kaifang Pang<sup>3,4</sup>, Li Zhou<sup>1,2</sup>, Arantxa Cebrián-Silla<sup>1,5</sup>, Susana González-Granero<sup>6</sup>, Shaohui Wang<sup>1,2</sup>, Qiuli Bi<sup>1,2</sup>, Matthew L. White<sup>1,2</sup>, Brandon Ho<sup>1,2</sup>, Jiani Li<sup>7</sup>, Tao Li<sup>1</sup>, Yonatan Perez<sup>1,2</sup>, Eric J. Huang<sup>8</sup>, Ethan A. Winkler<sup>5</sup>, Mercedes F. Paredes<sup>1,2</sup>, Rothem Kovner<sup>9</sup>, Nenad Sestan<sup>9</sup>, Alex A. Pollen<sup>1,2</sup>, Pengyuan Liu<sup>10</sup>, Jingjing Li<sup>1,2</sup>, Xianhua Piao<sup>1,11,12</sup>, José Manuel García-Verdugo<sup>6</sup>, Arturo Alvarez-Buylla<sup>1,5</sup>, Zhandong Liu<sup>3,4</sup>, Arnold R. Kriegstein<sup>1,2\*</sup>

<sup>1</sup>The Eli and Edythe Broad Center of Regeneration Medicine and Stem Cell Research, University of California San Francisco; San Francisco, CA 94143, USA.

<sup>2</sup>Department of Neurology, University of California San Francisco; San Francisco, CA 94143, USA.

<sup>3</sup>Jan and Dan Duncan Neurological Research Institute at Texas Children's Hospital; Houston, Texas 77030, USA.

<sup>4</sup>Department of Pediatrics, Baylor College of Medicine; Houston, Texas 77030, USA.

<sup>5</sup>Department of Neurological Surgery, University of California San Francisco; San Francisco, CA 94143, USA.

<sup>6</sup>Laboratory of Comparative Neurobiology, Cavanilles Institute of Biodiversity and Evolutionary Biology, University of Valencia and CIBERNED; Valencia, Spain.

<sup>7</sup>Gilead Sciences, Foster City, CA 94404, USA.

<sup>8</sup>Department of Pathology, University of California San Francisco; San Francisco, CA 94143, USA.

<sup>9</sup>Department of Neuroscience, Yale School of Medicine, New Haven, CT 06520, USA

<sup>10</sup>Department of Chemistry, University of Massachusetts Lowell; Lowell, MA 01854, USA.

<sup>11</sup>Division of Neonatology, Department of Pediatrics, University of California San Francisco; San Francisco, CA 94158, USA.

<sup>12</sup>Newborn Brain Research Institute, University of California San Francisco; San Francisco, CA 94158, USA.

\*Corresponding author. e-mail: Li.Wang@ucsf.edu; Arnold.Kriegstein@ucsf.edu.

**Abstract:** The molecular mechanisms and evolutionary changes accompanying synapse development are still poorly understood. Here, we generated a cross-species proteomic map of synapse development in the human, macaque, and mouse neocortex. By tracking the changes of >1,000 postsynaptic density (PSD) proteins from midgestation to young adulthood, we found that PSD maturation in humans separates into three major phases that are dominated by distinct pathways. Cross-species comparisons reveal that the human PSD matures about two to three times slower than other species and contains higher levels of Rho guanine nucleotide exchange factors (RhoGEFs) in the perinatal period. Enhancement of the RhoGEF signaling in human neurons delays the morphological maturation of dendritic spines and the functional maturation of synapses, potentially contributing to the neotenic traits of human brain development. In addition, PSD

40 proteins can be divided into four modules that exert stage- and cell type-specific functions,  
41 possibly explaining their differential associations with cognitive functions and diseases. Together,  
42 our proteomic map of synapse development provides a blueprint for studying the molecular basis  
43 and evolutionary changes of synapse maturation.

#### 44 **Main Text:**

45 Synapses establish the neuronal networks that mediate information processing in the brain.  
46 Synaptic dysfunction plays a critical role in most brain diseases, including disorders that typically  
47 occur in childhood, adolescence, or adulthood<sup>1-3</sup>. Therefore, understanding synapse formation,  
48 maturation, and specification is essential for understanding human cognition and mental disorders.

49 The two major types of chemical synapses in the brain are excitatory glutamatergic synapses and  
50 inhibitory GABAergic synapses. They differ in neurotransmitters, morphology, molecular  
51 composition, and postsynaptic organization<sup>4-7</sup>. The postsynaptic density (PSD) of excitatory  
52 synapses is a highly specialized structure located beneath the postsynaptic membrane and is more  
53 prominent than its counterpart at inhibitory synapses. Biochemical isolation of PSDs from the adult  
54 brain followed by mass spectrometry revealed that the PSD is a highly sophisticated protein  
55 complex composed of >1,000 proteins including cytoskeletal proteins, neurotransmitter receptors,  
56 signaling enzymes, ribosomal proteins, and scaffolding proteins<sup>8</sup>. Mutations in these proteins  
57 cause over 130 brain diseases<sup>9</sup>.

58 Excitatory synapses and associated PSDs undergo profound changes at both morphological and  
59 compositional levels during brain development<sup>10-14</sup>. In particular, developmental increases in the  
60 ratio of the N-methyl-D-aspartic acid (NMDA) receptor subunits GRIN2A to GRIN2B and of the  
61 PSD scaffolding proteins DLG4 to DLG3 are critical for the functional maturation of synapses<sup>15-</sup>  
62<sup>17</sup>. However, studies to understand the developmental changes of the PSD are limited to dozens of  
63 well-known PSD proteins typically identified in the adult brain<sup>10,12,13</sup>. Unbiased, systematic  
64 characterization has been limited, especially in humans<sup>18</sup>. In addition, synapse density,  
65 composition, and maturation rates differ between species, potentially contributing to the  
66 evolutionary variation of neurotransmission properties, cognitive ability, and behavioral repertoire  
67<sup>19-25</sup>. For example, prolonged maturation or neoteny of human synapses has been suggested as a  
68 possible explanation for the emergence of human-specific cognitive traits<sup>26-28</sup>. Nevertheless, we  
69 still know little about the underlying molecular mechanisms.

70 Here, we generate a cross-species proteomic map of synapse development in the neocortex,  
71 identifying the dynamics of >1,000 PSD proteins and the molecular pathways that govern  
72 individual phases of synapse maturation. A comparison of the maturing PSDs in humans to those  
73 in macaques and mice reveals that PSD maturation in humans is two to three times slower than  
74 that in other species. Moreover, Rho guanine nucleotide exchange factors (RhoGEFs), which serve  
75 to delay synapse maturation, are more abundant in human PSDs in the perinatal phase, possibly  
76 contributing to the neotenic traits of human synapses. Integrating these data with transcriptomic  
77 and genetic data, we further determine the gene regulatory network, cell type specificity, and  
78 selective disease vulnerability of synapse maturation. Our data provide a temporal map of the  
79 topology of synapse development in the neocortex and offer insight into the evolutionary  
80 mechanisms of synaptic neoteny in humans.

#### 81 **Results**

##### 82 *Changes in PSD composition during human neocortical development*

83 To understand the molecular changes of the PSD in the developing human neocortex, we obtained  
84 neocortical samples across six major developmental stages ranging from the second trimester to  
85 young adulthood (Fig. 1a, Supplementary Table 1). The six stages were chosen to cover major  
86 developmental events including neurogenesis, neuronal migration, synaptogenesis, myelination,  
87 and synaptic pruning. We used samples from the prefrontal cortex (PFC) to reduce the confounding  
88 effect of cortical areas, except for second trimester samples that lacked area information due to  
89 limited availability. PSDs were isolated from each sample as described previously<sup>29</sup>. Isolation of  
90 the PSD, including from immature human brain samples, was successful as indicated by the  
91 following quality control metrics. Integral components of the PSD, but not presynaptic (SYP) or  
92 cytoplasmic (GAPDH) proteins, were enriched in the PSD fraction of early-stage samples  
93 (Extended Data Fig. 1a). In addition, electron microscopy identified typical PSD-like electron-  
94 dense structures in the PSD fraction of immature samples (Extended Data Fig. 1b). Furthermore,  
95 GRIN2B and DLG4, two PSD proteins that decrease and increase, respectively, during PSD  
96 maturation<sup>12</sup>, showed the expected temporal abundance patterns in isolated PSDs (Extended Data  
97 Fig. 1c). Finally, the yield of PSDs correlated well with the estimated number of synapses  
98 (Extended Data Fig. 1d).

99 We performed liquid chromatography and tandem mass spectrometry (LC-MS/MS) analysis and  
100 label-free quantification on 54 PSD samples. Each PSD sample was isolated from a different  
101 neurologically normal individual and had passed screening for synaptic proteome preservation<sup>30</sup>.  
102 The identified proteins overlapped significantly with previously reported PSD proteins at  
103 comparable stages (Extended Data Fig. 1e)<sup>9,31</sup>. After removing potential contaminants, we found  
104 a total of 1765 PSD proteins with some proteins being stage-specific (Extended Data Fig. 1f,  
105 Supplementary Table 2). To assess the quality of the data, we first sought to determine whether  
106 developmental changes were the main driver of variance. Principal component (PC) analysis  
107 revealed that samples from the same age group were closely clustered (Fig. 1b). PC1, accounting  
108 for 39.5% of the variability, was strongly correlated with the age of the samples but not with other  
109 potential confounding factors like sex or processing batch (Extended Data Fig. 1g). Moreover,  
110 variance across age groups explains a median of 41.7% of the variation in the dataset, after  
111 correcting for processing batch, PSD quality, and sex (Extended Data Fig. 1g). Hierarchical  
112 clustering also showed that samples were clustered by age (Fig. 1c). Proteins such as GRIN2A,  
113 GRIN2B, DLG3, and DLG4 showed the expected abundance patterns during PSD maturation and  
114 were consistent with Western blotting data (Fig. 1c, Extended Data Fig. 2a,b). To validate the  
115 identified PSD proteins *in situ* in the immature human neocortex, we performed immunostaining  
116 of several proteins that show enrichment at midgestation, including the ribosomal subunit RPS6,  
117  $\beta$ -catenin (CTNNB1), the vesicle trafficking regulator GDI1, and the actin modulator cofilin  
118 (CFL1). All these proteins colocalized with the canonical PSD marker DLG4 in a subset of  
119 synapses (Extended Data Fig. 3).

120 We performed gene set enrichment analysis (GSEA) to identify molecular pathways with higher  
121 activity at individual developmental stages compared with other stages. In general, PSD  
122 maturation appears to undergo three major phases (midgestational, perinatal, and postnatal). The  
123 midgestational phase, between gestational week 18 to 23, was enriched for translation-related  
124 pathways (Fig. 1d,e, Extended Data Fig. 2c). The perinatal phase, between the third trimester and  
125 one year of age, was enriched for Rho GTPase and protein folding pathways (Fig. 1d,e, Extended  
126 Data Fig. 2d). The postnatal phase, above four years of age, was enriched for synaptic  
127 transmission-related pathways and neuroligin/neurexin-associated proteins which play instructive  
128 roles in synapse formation and maturation<sup>32</sup> (Fig. 1d,e, Extended Data Fig. 2e). These results

129 suggest that local protein synthesis, actin cytoskeleton reorganization, and enhancement of  
130 synaptic efficacy were sequentially activated during PSD development. At the individual protein  
131 level, proteins from the same complex or pathway generally exhibit similar abundance changes  
132 during development (Fig. 1e, Extended Data Fig. 2c–e). However, relative changes in the  
133 abundance of homologous proteins such as GRIN2A/GRIN2B and DLG3/DLG4, as shown above,  
134 are critical for synapse maturation<sup>15–17</sup>. Another example concerns the two predominant  $\alpha$ -amino-  
135 3-hydroxy-5-methyl-4-isoxazolepropionic acid (AMPA) receptor subunits GRIA1 and GRIA2.  
136 We found that GRIA2 increased steadily during development, whereas GRIA1 remained relatively  
137 constant (Fig. 1e), consistent with GRIA2-lacking, and thus calcium-permeable AMPA receptors  
138 being essential for early synaptic function<sup>33</sup>. In addition to these proteins, we discovered many  
139 other homologous proteins that exhibited reciprocal pattern changes (Fig. 1f, Extended Data Fig.  
140 4), including drebrin/drebrin-like proteins, whose abundance changes were further validated by  
141 immunostaining (Fig. 1g, Extended Data Fig. 5). These newly identified reciprocal changes may  
142 also play important roles in PSD maturation.

### 143 ***Protein modules and their coordinated functions in the PSD***

144 Proteins with similar abundance patterns during PSD maturation could represent protein modules  
145 with specific molecular functions. We identified four protein modules based on correlation by  
146 weighted correlation network analysis (WGCNA) (Fig. 2a)<sup>34</sup>. All four modules were significantly  
147 enriched for protein-protein interactions (PPIs), whereas no enrichment was found for proteins  
148 with no module assignment (the grey module) (Fig. 2b), suggesting that proteins in the same  
149 module work synergistically by forming protein complexes. Indeed, pathway overrepresentation  
150 analysis highlighted module-specific enrichment in particular biological pathways (Fig. 2c,  
151 Supplementary Table 3). Specifically, the brown, blue, turquoise, and yellow modules, ranked by  
152 their timing of peak abundance, were enriched with translation-related pathways, axon guidance-  
153 related pathways, Rho GTPase-related pathways, and synaptic transmission-related pathways,  
154 respectively (Fig. 2c). Similar results were obtained by synaptic gene ontology (SynGO)  
155 enrichment analysis (Extended Data Fig. 6a, Supplementary Table 3)<sup>35</sup>. In summary, abundance  
156 patterns and molecular functions of the PSD protein modules are consistent with the GSEA results  
157 at individual developmental stages.

158 To visualize potential protein complexes and interactions in the PSD, we generated PPI-co-  
159 abundance networks in each module (see Methods) (Extended Data Figs. 6b, 7, 8). As expected,  
160 proteins involved in the same pathway were clustered more closely, as indicated by a shorter  
161 average path length to each other than to proteins outside the pathway (Extended Data Fig. 6b,c).  
162 PPIs and biological functions of a protein are often mediated by protein domains. We determined  
163 the distribution of protein domains in the modules (Fig. 2d) and the domain architecture of  
164 individual proteins (Extended Data Fig. 9, Supplementary Table 4). Domains involved in vesicle  
165 trafficking (RAB and t\_SNARE), cell adhesion (LRR, CA, and ARM), signal transduction (S\_TKc,  
166 C1, and C2), and adult PSD scaffolds (PDZ, SH3, and GuKc)<sup>13</sup> were enriched in the brown, blue,  
167 turquoise, and yellow modules, respectively (Fig. 2d). Interestingly, although both the blue and  
168 turquoise modules were involved in Rho GTPase signaling (Fig. 2d), RhoGAP and RhoGEF  
169 domains were selectively enriched in each of them (Fig. 2d). Indeed, Rho GTPase-activating  
170 proteins (RhoGAPs), particularly those specific for Rac1 and Cdc42, were enriched in the blue  
171 module (Fig. 2e,f, Extended Data Fig. 10a–c, Supplementary Table 4). Conversely, Rho guanine  
172 nucleotide exchange factors (RhoGEFs), particularly those specific for Rac1, were enriched in the  
173 turquoise module (Fig. 2e,f, Extended Data Fig. 10d,e, Supplementary Table 4). Given that

174 RhoGAP and RhoGEF proteins exert antagonistic functions in activating Rho GTPases, these  
175 results suggest that synaptic Rho GTPases are gradually shifting towards a more active state during  
176 PSD maturation to facilitate stage-specific cytoskeleton reorganization requirements and  
177 morphological changes.

### 178 ***Generalization to other cortical regions***

179 Our initial analysis focused on the PFC. To address whether our findings are applicable to other  
180 cortical regions, we conducted a similar analysis on PSD samples from human primary visual  
181 cortex (V1), which is located on the opposite pole of the rostral-caudal axis from PFC and is a  
182 sensory cortical area (Extended Data Fig. 11a, Supplementary Table 1, Supplementary Table 5).  
183 Our analysis found that, like PFC, V1 samples were separated into three clusters corresponding to  
184 the midgestational, perinatal, and postnatal phases (Extended Data Fig. 11b,c). Additionally, we  
185 observed similar pathway enrichment patterns with translation-, Rho GTPase-, and synaptic  
186 transmission-related pathways activated sequentially from midgestation to adulthood (Extended  
187 Data Fig. 11d, Supplementary Table 5). Further, the four PSD modules showed similar abundance  
188 patterns in V1 (Extended Data Fig. 11e). To compare the PSD samples quantitatively between the  
189 two regions, we calculated the Pearson correlation coefficients and found that they correlated well  
190 with counterparts in the same phase, with a Pearson  $r > 0.75$  (Extended Data Fig. 11f). Therefore,  
191 our results suggest that the major findings from the PFC dataset can be generalized to other regions  
192 of the human neocortex, including V1.

### 193 ***Transcription of PSD proteins and its cell type specificity***

194 To understand the role of transcription in regulating PSD development, we compared the RNA  
195 levels of PSD modules with their abundance patterns. Integrating BrainSpan and PsychENCODE  
196 transcriptomic data<sup>36,37</sup> from the developing human neocortex with our proteomic data, we found  
197 that the general trends were preserved. However, the respective differences between the  
198 brown/blue and turquoise/yellow modules were greatly diminished (Fig. 3a, Supplementary Table  
199 5). For example, Rho GTPase regulators and PSD scaffolding proteins from the turquoise and  
200 yellow modules, respectively, had distinct abundance patterns in the proteomic data, but they had  
201 similar expression patterns in the transcriptomic data (Fig. 3b). To quantify the concordance  
202 between RNA and protein, we calculated the Spearman's rank coefficient of correlation between  
203 RNA and protein levels of all PSD proteins (Supplementary Table 5). We found that proteins in  
204 the blue and yellow modules generally had high RNA-protein concordance (median Spearman  $r >$   
205  $0.5$ ) (Fig. 3c). In contrast, brown and turquoise modules had significantly lower concordance (Fig.  
206 3c), suggesting that post-transcriptional/translational regulatory mechanisms such as protein  
207 trafficking and turnover play key roles in regulating their PSD abundance. Consistent with these  
208 results, module density and connectivity preservation analysis<sup>38</sup> showed that although all four  
209 modules were at least moderately preserved in the transcriptomic data, the brown and turquoise  
210 modules were among the least preserved (Extended Data Fig. 12a).

211 The high RNA-protein concordance of proteins in the blue and yellow modules suggests that their  
212 PSD abundances are mainly regulated by transcription. Therefore, we focused on the blue and  
213 yellow modules to study the transcriptional regulatory mechanisms of PSD development.  
214 Transcription factor (TF) enrichment analysis by ChEA3 revealed core TF networks targeting the  
215 two modules (Fig. 3d and Supplementary Table 6). Some of the TFs identified in these networks,  
216 such as FOXG1, MEIS2, MYT1L, and RORB, are known to be critical regulators of neuronal  
217 differentiation and synapse development. To investigate transcription of the blue and yellow

218 modules in a cell type-specific manner, we integrated our PSD proteomic data with single-cell  
219 RNA-sequencing data from the developing and adult human neocortex (Extended Data Fig. 12b,c,  
220 Supplementary Table 7)<sup>39,40</sup>. We found that both excitatory neurons (EN) and inhibitory neurons  
221 (IN) had a reduction in blue module gene expression and an increase in yellow module gene  
222 expression during development. However, the developmental reduction of blue module genes in  
223 INs, particularly those derived from the caudal ganglionic eminence (IN\_CGE), was slower than  
224 that of ENs (Fig. 3e). On the other hand, yellow module gene expression increased significantly  
225 faster in excitatory intratelencephalic neurons (EN\_IT) (Fig. 3e). While there was more  
226 heterogeneity among individual neuronal subtypes in the adult brain, the overall trend remained  
227 consistent, with INs maintaining higher expression of genes encoding early-stage synaptic proteins  
228 compared to ENs (Fig. 3f). This difference in expression can be attributed to the differential  
229 expression of TFs targeting the two modules (Fig. 3g). Differences in transcription and abundance  
230 of PSD proteins may contribute to the distinct excitatory postsynaptic responses observed in these  
231 two subclasses of cortical neurons<sup>41</sup>.

### 232 *Species differences in PSD development*

233 Excitatory synapses and the PSD in humans, macaques, and mice are similar, yet they differ at  
234 both the morphological and molecular levels<sup>22,24,42</sup>. In light of this, we sought to investigate the  
235 changes in PSD development that contribute to the differences across these three species. We  
236 collected macaque and mouse neocortical samples at five time points (Fig 4a, Supplementary  
237 Table 7). These time points roughly correspond to the developmental stages of our human samples  
238<sup>43</sup>. Samples from macaques were collected from the PFC, as it was the predominant source of our  
239 human samples. Because mice do not have a granular PFC<sup>44</sup> and our findings from the human  
240 PFC can be generalized to other cortical areas, we collected whole mouse neocortex instead.

241 Proteomic analysis identified 1572 proteins in the developing macaque PSDs and 1572 proteins in  
242 mouse PSDs (Supplementary Tables 9,10), with some proteins being stage-specific (Extended  
243 Data Fig. 13a,b). Both PC analysis and hierarchical clustering showed that samples clustered by  
244 their age groups (Extended Data Fig. 13c–f). GSEA showed that, as in humans, translation-related  
245 pathways and synaptic transmission-related pathways were more active in early and late PSD  
246 development, respectively, in both macaques and mice (Fig. 4b). However, enrichment of  
247 pathways in the human perinatal phase, including Rho GTPase signaling and protein folding, was  
248 largely diminished in macaques and mice (Fig. 4b). To compare PSD samples from different  
249 species quantitatively, we performed cross-species similarity analysis. We calculated the Pearson  
250 correlation coefficients between PSD samples from different species and found that human  
251 samples in the second trimester and above four years of age correlated well with macaque and  
252 mouse samples at the corresponding stages (Pearson  $r > 0.6$ ) (Fig. 4c). However, human samples  
253 between the third trimester and one year of age (the perinatal phase) showed relatively low  
254 correlations with all age groups in other species. We then sought to identify changes in PSD  
255 development that led to this difference.

256 Different species have distinct developmental timescales, making it hard to compare the abundance  
257 of PSD proteins directly. We, therefore, applied a regularized linear approach (see Methods) to  
258 unbiasedly predict the equivalent PSD ages of all three species based on their proteomic profiles  
259 (Fig. 4d, Supplementary Table 11). We found that multiplicative changes in real age were  
260 approximately linearly associated with multiplicative changes in the predicted equivalent human  
261 PSD age, except that macaque samples appeared to undergo two different stages separated by one  
262 year of age (Fig. 4d). We thus regressed the log-transformed humanized ages against the real log-

263 transformed ages using a linear model (or a linear spline model for macaque samples) and obtained  
264 the slope coefficients as an estimator of PSD maturation rate normalized to the developmental  
265 timescale of individual species. This analysis revealed that PSD maturation was about three times  
266 slower in humans than in mice and macaques (< 1 year) (Fig. 4d).

267 Based on the equivalent PSD ages, we compared the abundance patterns of the human PSD  
268 modules in all three species. While the patterns of the blue and yellow modules were similar across  
269 all species, the brown and turquoise modules displayed species-specific differences (Fig. 4e).  
270 Specifically, the brown module was less abundant, and the turquoise module was more abundant  
271 in humans at the perinatal phase, likely causing the low correlation we observed in the similarity  
272 analysis at this developmental stage. Accordingly, module density and connectivity preservation  
273 analysis showed that the brown and turquoise modules were among the least preserved in  
274 macaques and mice (Extended Data Fig. 13g,h). Given the low RNA-protein concordance of these  
275 two modules (Fig. 3c), our results also highlight the role of post-transcriptional/translational  
276 regulation in shaping the distinctive features of human synapses.

277 Similar results were obtained when comparing the macaque and mouse datasets to the human V1  
278 dataset (Fig. 4g, Extended Data Fig. 14). One minor but interesting difference is that the predicted  
279 PSD maturation rate in human V1 was about two times slower than in mice and macaques (< 1  
280 year) and about 40% faster than in human PFC (Fig. 4f). This is consistent with previous findings  
281 that sensory cortical areas sensory cortex, such as V1, generally matures faster than association  
282 areas like PFC<sup>45,46</sup>. In conclusion, human PSD matures at a slower rate in the neocortex, and the  
283 perinatal phase of its development is less represented in macaques and mice.

#### 284 ***Enhancement of RhoGEF signaling promotes neoteny of human synapses***

285 The slower maturation rate of the human PSD could result from the increased abundance of  
286 turquoise module proteins and enrichment of Rho GTPase regulators at the perinatal phase. To test  
287 this hypothesis, we further investigated the increase of RhoGEF signaling in the human PSD.  
288 Indeed, most RhoGEF proteins in the turquoise module were greatly increased at the perinatal  
289 phase in humans and remained more abundant than those in other species thereafter in our  
290 proteomic data (Fig. 5a). This finding was further confirmed by Western blotting (Fig. 5b,  
291 Extended Data Fig. 15a–c) and immunostaining (Fig. 5c, Extended Data Fig. 16). Note that no  
292 significant changes were observed in the total homogenate over time (Extended Data Fig. 15a),  
293 consistent with our hypothesis that protein trafficking plays a crucial role in regulating the PSD  
294 abundance of turquoise module proteins. Postmortem accumulation could lead to an artificial  
295 increase in PSD proteins as has been reported for tubulins<sup>47</sup>. To rule out the possibility that  
296 postmortem accumulation caused the observed increase in RhoGEF proteins, we compared adult  
297 PSDs prepared from postmortem samples (postmortem interval between 14 to 17 hours) with those  
298 from neurosurgical biopsy and found that RhoGEF levels were comparable (Extended Data Fig.  
299 15d). Next, we tested whether the increase in RhoGEF proteins led to the activation of their known  
300 downstream pathways. A majority of RhoGEF proteins in the turquoise module target Rac1. We  
301 found that phosphorylation of PAK and CFL1, both downstream effectors of Rac1, increased in  
302 human synaptosomes along with RhoGEFs during synapse maturation (Extended Data Fig. 15e,f).  
303 However, no change was observed in mouse neurons (Extended Data Fig. 15e,f). Together, these  
304 results validated the enhancement of RhoGEF signaling in the human PSD.

305 Next, we manipulated Rho GTPase regulators in neurons to understand their role in synapse  
306 maturation. We individually overexpressed two RhoGEF proteins from the turquoise module,

307 ARHGEF7 and RASGRF2, in developing human cortical neurons (Extended Data Fig. 17). The  
308 density of synapses, quantified by DLG4 and SYN1 co-staining, was similar (Fig. 5d), indicating  
309 that synaptogenesis was not affected. However, analysis of the morphology of dendritic spines  
310 revealed that overexpressing either ARHGEF7 or RASGRF2 increased spine length and promoted  
311 the formation of more immature spine types (long thin and filopodia) (Fig. 5d). We also observed  
312 a significant increase in spine density in RhoGEF overexpressing neurons (Fig. 5d). Similar results  
313 were observed in mouse cortical neurons (Fig. 5e). Conversely, individually knocking down two  
314 RhoGAP proteins from the blue module, ARHGAP23 and SRGAP1, partially phenocopied  
315 RhoGEF overexpression in increasing spine length and immaturity (Extended Data Fig. 18,  
316 Supplementary Table 12). To test whether these morphological changes translate into functional  
317 consequences, we recorded miniature excitatory postsynaptic currents (mEPSCs) in human  
318 neurons with and without RhoGEF overexpression. We found that mEPSC frequency was  
319 significantly decreased in neurons overexpressing either ARHGEF7 or RASGRF2 (Fig. 5f).  
320 Moreover, the surface level of AMPA receptor GRIA1 was reduced by ARHGEF7 or RASGRF2  
321 overexpression (Fig. 5g, Extended Data Fig. 19). These data suggest that overexpression of  
322 specific RhoGEF proteins increases filopodial silent synapses and inhibits their functional  
323 maturation. Altogether, our results suggest that the human-specific increase in selective RhoGEF  
324 proteins delays maturation and promotes neoteny of human synapses.

### 325 ***PSD modules in human cognition and brain disorders***

326 We next investigated whether genetic variants associated with human cognition converge onto the  
327 human PSD modules, identifying that the turquoise module was enriched for GWAS signals of  
328 processing speed and fluid intelligence (the UK Biobank) (Fig. 6a). The turquoise module has its  
329 peak expression shortly after birth, at which time infants perceive a wealth of external stimuli.  
330 Thus, we posited that proteins in this module were important for activity-dependent synaptic  
331 remodeling. Indeed, the turquoise module was highly enriched for activity-dependent proteins in  
332 neurons (Odds ratio > 3; Fig. 6b, Supplementary Table 13)<sup>48</sup>, including TRIM3 (an activity-  
333 dependent ubiquitin ligase for PSD scaffolding proteins)<sup>49</sup>, GRIPAP1 (a recycling endosome  
334 regulator critical for synaptic plasticity)<sup>50</sup>, and NGEF (a RhoGEF protein) (Extended Data Fig.  
335 20). Combined with the fact that the turquoise module is more abundant in the human PSD and  
336 that RhoGEF proteins in this module promote synaptic neoteny, these results highlight the possible  
337 significance of this module in the evolutionary enhancement of human cognitive function.

338 Synaptic dysfunction contributes to both neurodevelopmental and psychiatric disorders, often  
339 caused by *de novo* and common variants, respectively. Regarding *de novo* variants, genes encoding  
340 PSD proteins were more intolerant of protein-truncating variants (PTVs) (lower LOEUF scores)  
341 and missense variants (higher missense Z-scores) compared with all genes expressed in the  
342 neocortex (Fig. 6c), suggesting that mutations in these genes are more likely to cause human  
343 diseases. Remarkably, the turquoise module was particularly intolerant of missense variants (Fig.  
344 6c). No difference was observed for synonymous mutations (Extended Data Fig. 20b).  
345 Accordingly, we found that genes encoding PSD proteins were enriched for *de novo*  
346 nonsynonymous variants associated with neurodevelopmental disorders including epilepsy,  
347 developmental delay (DD), and intellectual disability (ID) (denovo-db) (Fig. 6d, Extended Data  
348 Fig. 20c,d, Supplementary Table 13). In particular, the turquoise module had excessive missense  
349 variants, whereas the yellow module was enriched for both missense variants and PTVs. Turquoise  
350 module genes with disease-associated missense variants included genes encoding ion channels  
351 such as *KCNQ2* and *SCN2A* and molecular motors such as *DYNC1H1* and *KIF1A*. Some of these



352 missense variants may be gain-of-function or dominant-negative mutations with different  
353 pathogenic effects than PTVs<sup>51,52</sup>. In contrast, many yellow module genes with PTVs were genes  
354 encoding enzymes that regulate PSD organization and postsynaptic receptor trafficking, such as  
355 *SYNGAP1*, *IQSEC2*, and *CDKL5*. Therefore, although mutations in both modules contribute to  
356 neurodevelopmental disorders, the different patterns of module abundance and variant type  
357 enrichment suggest that they do so by different mechanisms that target distinct stages of synapse  
358 maturation.

359 For psychiatric disorders, the brown module was enriched for GWAS signals of diseases that  
360 generally manifest in young adulthood, including schizophrenia (SCZ), bipolar disorder (BPD),  
361 and major depressive disorder (MDD) (The Psychiatric Genomics Consortium) (Fig. 6e, Extended  
362 Data Fig. 21a, Supplementary Table 13). Proteins in the brown module had peak abundance at  
363 midgestation, indicating an early etiology involving synapse development for these  
364 adolescence/adult-onset disorders. However, after the onset of these psychiatric disorders, genes  
365 encoding PSD proteins in the late modules (turquoise and yellow) were downregulated compared  
366 with controls (Fig. 6f, Extended Data Fig. 21b,c, Supplementary Table 13). This is likely the  
367 consequence of a downstream cascade of biological events following earlier-acting genetic risk  
368 factors that disrupt synapse development.

## 369 Discussion

370 Although synapses and the PSD are known to undergo profound remodeling in brain development  
371 to enable the formation and reorganization of brain networks<sup>10,12,53</sup>, we have had limited  
372 knowledge of the molecular changes that occur during this remodeling. In this study, we generated  
373 a cross-species proteomic map of synapse development and revealed the temporal dynamics  
374 of >1,000 PSD proteins. We demonstrate that the human PSD undergoes three major phases of  
375 maturation. By relating the abundance of PSD proteins to each other, we further uncovered  
376 individual protein modules and networks that exert stage-, cell type-, and species-specific  
377 functions. Furthermore, we found that the PSD develops about two to three times slower in human  
378 neocortex than in other species and that the increased abundance of RhoGEF proteins, as expressed  
379 in the turquoise module, contributes to this difference. The turquoise module is also associated  
380 with synaptic plasticity, human cognitive function, and mental disorders. Together, these data  
381 provide a blueprint for studying the molecular and evolutionary mechanisms of synapse maturation  
382 in humans.

383 Synapse development is regulated at both RNA and protein levels<sup>54</sup>. By integrating PSD  
384 proteomic data with bulk RNA-sequencing data, we found that different PSD modules exhibit  
385 different RNA-protein concordance, suggesting that they are differentially regulated by post-  
386 transcriptional/translational mechanisms. Focusing on the modules with high RNA-protein  
387 concordance, we inferred neuronal subtype-specific PSD signatures from single-cell RNA-  
388 sequencing data. Our analysis revealed major differences in the PSD between excitatory and  
389 inhibitory neuronal subtypes in the neocortex. This is consistent with previous studies showing  
390 that the composition of the PSD is diverse among neuronal subtypes<sup>55-57</sup>. Moreover, INs have  
391 higher levels of blue module genes, including those encoding RhoGAPs which suppress dendritic  
392 spine formation. This could contribute to the differences in spine densities observed between ENs  
393 and INs<sup>58</sup>. One limitation of this inference is that single-cell RNA-sequencing does not include  
394 RNAs in dendrites that could contribute to the PSD through local translation. Although somatic  
395 and dendritic RNAs are significantly correlated<sup>59</sup>, future studies to determine the proteomic  
396 profiles of neuronal subtype-specific PSDs will help expand these findings.

397 Previous studies identified a critical role of a RhoGAP protein, SRGAP2, in the human-specific  
398 developmental delay in synapse maturation and increase in synaptic density<sup>60–62</sup>. It has been  
399 shown that the Rac1-GAP activity of the ancestral protein SRGAP2A limits the spine neck length  
400 and density in neocortical neurons. Human-specific partial duplications of SRGAP2 inhibited the  
401 function of SRGAP2A, resulting in longer spine necks and higher spine density in humans. Our  
402 study found that multiple RhoGEF proteins have increased abundance in the human PSD starting  
403 at the perinatal stages. Enhancement of RhoGEF signaling in neurons not only increased spine  
404 length and density but also delayed functional maturation of synapses. Given the antagonistic roles  
405 of RhoGAP and RhoGEF proteins in activating Rho GTPases, our results are consistent with the  
406 previous findings and suggest that increased synaptic Rho GTPase activity contributes to the  
407 neoteny of human synapses. Moreover, RhoGEF proteins are enriched in the turquoise module  
408 associated with human cognitive function. Thus, our analysis provides molecular evidence that  
409 links synaptic neoteny to the evolution of human cognition.

410 Early synaptic connections before the third trimester are often transient stepping-stones toward  
411 functional synaptic circuits in mature brains<sup>63</sup>. Surprisingly, genetic variations of PSD proteins  
412 specifically abundant at midgestation are associated with adolescent-onset psychiatric disorders.  
413 Given the dysregulation of late-stage synaptic proteins after the onset of these disorders, our  
414 findings highlight the importance of early synaptic connections for shaping neuronal wiring and  
415 higher-order brain functions of the mature brain.

416 There are several limitations to this study. Isolation of PSDs by subcellular fractionation can  
417 include contaminants from other cellular compartments or associated structures<sup>64</sup>. We have  
418 therefore applied multistep orthogonal data filtering to minimize the effect of contamination.  
419 Additional independent validation, such as proximity proteomics or immunogold labeling, will  
420 further determine if newly identified proteins are *bona fide* PSD components. Moreover,  
421 alternative splicing and the isoforms they produce play a key role in regulating synapse  
422 development<sup>65,66</sup>. However, our proteomic analysis does not include quantifications at the isoform  
423 level due to technical limitations. Furthermore, PSDs are heterogenous and likely different  
424 between individual synapses, yet our data represent the averaged proteomic profiles of PSDs at  
425 the bulk tissue level. Lastly, the enrichment of activity-dependent proteins in the turquoise module  
426 was based on experimental data from rat neurons but not human neurons<sup>48</sup>. With the development  
427 of novel methods, future studies determining developmental and activity-dependent changes of the  
428 synaptic proteome at the isoform level across different brain regions, cell types, and species will  
429 provide further insight into the mechanisms of brain development, evolution, and disease.

430

## 431 Reference

- 432 1. Zoghbi, H. Y. & Bear, M. F. Synaptic Dysfunction in Neurodevelopmental Disorders  
433 Associated with Autism and Intellectual Disabilities. *Cold Spring Harb Perspect Biol* **4**,  
434 a009886–a009886 (2012).
- 435 2. Frankle, W. G., Lerma, J. & Laruelle, M. The synaptic hypothesis of Schizophrenia.  
436 *Neuron* **39**, 205–216 (2003).
- 437 3. Shankar, G. M. & Walsh, D. M. Alzheimer’s disease: Synaptic dysfunction and A $\beta$ . *Mol*  
438 *Neurodegener* **4**, 1–13 (2009).
- 439 4. Craig, A. M. & Boudin, H. Molecular heterogeneity of central synapses: afferent and  
440 target regulation. *Nature Neuroscience* *2001 4:6* **4**, 569–578 (2001).

- 441 5. Harris, K. M. & Weinberg, R. J. Ultrastructure of synapses in the mammalian brain. *Cold*  
442 *Spring Harb Perspect Biol* **4**, 7 (2012).
- 443 6. Uezu, A. *et al.* Identification of an elaborate complex mediating postsynaptic inhibition.  
444 *Science* **353**, 1123–9 (2016).
- 445 7. Tao, C. L. *et al.* Differentiation and Characterization of Excitatory and Inhibitory  
446 Synapses by Cryo-electron Tomography and Correlative Microscopy. *Journal of*  
447 *Neuroscience* **38**, 1493–1510 (2018).
- 448 8. Sheng, M. & Kim, E. The postsynaptic organization of synapses. *Cold Spring Harb*  
449 *Perspect Biol* **3**, (2011).
- 450 9. Bayès, A. *et al.* Characterization of the proteome, diseases and evolution of the human  
451 postsynaptic density. *Nat Neurosci* **14**, 19–21 (2011).
- 452 10. Swulius, M. T., Kubota, Y., Forest, A. & Waxham, M. N. Structure and composition of  
453 the postsynaptic density during development. *Journal of Comparative Neurology* **518**,  
454 4243–4260 (2010).
- 455 11. Sell, G. L., Barrow, S. L. & McAllister, A. K. Molecular composition of developing  
456 glutamatergic synapses. in *Synapse Development and Maturation* 3–32 (Elsevier, 2020).  
457 doi:10.1016/B978-0-12-823672-7.00001-6.
- 458 12. Petralia, R. S., Sans, N., Wang, Y. X. & Wenthold, R. J. Ontogeny of postsynaptic density  
459 proteins at glutamatergic synapses. *Molecular and Cellular Neuroscience* **29**, 436–452  
460 (2005).
- 461 13. Li, J. *et al.* Spatiotemporal profile of postsynaptic interactomes integrates components of  
462 complex brain disorders. *Nat Neurosci* **20**, 1150–1161 (2017).
- 463 14. Harris, K. M., Jensen, F. E. & Tsao, B. Three-dimensional structure of dendritic spines  
464 and synapses in rat hippocampus (CA1) at postnatal day 15 and adult ages: implications  
465 for the maturation of synaptic physiology and long-term potentiation. *J Neurosci* **12**,  
466 2685–705 (1992).
- 467 15. van Zundert, B., Yoshii, A. & Constantine-Paton, M. Receptor compartmentalization and  
468 trafficking at glutamate synapses: a developmental proposal. *Trends Neurosci* **27**, 428–  
469 437 (2004).
- 470 16. Elias, G. M., Elias, L. A. B., Apostolides, P. F., Kriegstein, A. R. & Nicoll, R. A.  
471 Differential trafficking of AMPA and NMDA receptors by SAP102 and PSD-95 underlies  
472 synapse development. *Proc Natl Acad Sci U S A* **105**, 20953–20958 (2008).
- 473 17. Gray, J. A. *et al.* Distinct Modes of AMPA Receptor Suppression at Developing Synapses  
474 by GluN2A and GluN2B: Single-Cell NMDA Receptor Subunit Deletion In Vivo. *Neuron*  
475 **71**, 1085–1101 (2011).
- 476 18. Kaizuka, T. *et al.* Developmental dynamics of the postsynaptic proteome to understand  
477 synaptic maturation and dysmaturation. *bioRxiv* 2022.05.05.490828 (2022)  
478 doi:10.1101/2022.05.05.490828.
- 479 19. DeFelipe, J. The evolution of the brain, the human nature of cortical circuits, and  
480 intellectual creativity. *Front Neuroanat* **5**, 1–17 (2011).
- 481 20. Elston, G. N., Benavides-Piccione, R. & DeFelipe, J. The pyramidal cell in cognition: a  
482 comparative study in human and monkey. *J Neurosci* **21**, 1–5 (2001).
- 483 21. Bayès, À. *et al.* Evolution of complexity in the zebrafish synapse proteome. *Nat Commun*  
484 **8**, (2017).

- 485 22. Bayés, À. *et al.* Comparative Study of Human and Mouse Postsynaptic Proteomes Finds  
486 High Compositional Conservation and Abundance Differences for Key Synaptic Proteins.  
487 *PLoS One* **7**, e46683 (2012).
- 488 23. Emes, R. D. *et al.* Evolutionary expansion and anatomical specialization of synapse  
489 proteome complexity. *Nat Neurosci* **11**, 799–806 (2008).
- 490 24. Benavides-Piccione, R., Ballesteros-Yáñez, I., DeFelipe, J. & Yuste, R. Cortical area and  
491 species differences in dendritic spine morphology. *J Neurocytol* **31**, 337–346 (2002).
- 492 25. Shibata, M. *et al.* Hominini-specific regulation of CBLN2 increases prefrontal  
493 spinogenesis. *Nature* **598**, 489–494 (2021).
- 494 26. Petanjek, Z. *et al.* Extraordinary neoteny of synaptic spines in the human prefrontal  
495 cortex. *Proceedings of the National Academy of Sciences* **108**, 13281–13286 (2011).
- 496 27. Liu, X. *et al.* Extension of cortical synaptic development distinguishes humans from  
497 chimpanzees and macaques. *Genome Res* **22**, 611–622 (2012).
- 498 28. Schmidt, E. R. E. & Polleux, F. Genetic Mechanisms Underlying the Evolution of  
499 Connectivity in the Human Cortex. *Front Neural Circuits* **15**, 1–16 (2022).
- 500 29. Wang, L. *et al.* An autism-linked missense mutation in SHANK3 reveals the modularity  
501 of Shank3 function. *Mol Psychiatry* **25**, 2534–2555 (2020).
- 502 30. Bayés, À. *et al.* Human post-mortem synapse proteome integrity screening for proteomic  
503 studies of postsynaptic complexes. *Mol Brain* **7**, 1–11 (2014).
- 504 31. Roy, M. *et al.* Proteomic analysis of postsynaptic proteins in regions of the human  
505 neocortex. *Nat Neurosci* **21**, 130–141 (2018).
- 506 32. Craig, A. M. & Kang, Y. Neurexin–neuroligin signaling in synapse development. *Curr*  
507 *Opin Neurobiol* **17**, 43–52 (2007).
- 508 33. Pickard, L., Noel, J., Henley, J. M., Collingridge, G. L. & Molnar, E. Developmental  
509 changes in synaptic AMPA and NMDA receptor distribution and AMPA receptor subunit  
510 composition in living hippocampal neurons. *Journal of Neuroscience* **20**, 7922–7931  
511 (2000).
- 512 34. Langfelder, P. & Horvath, S. WGCNA: an R package for weighted correlation network  
513 analysis. *BMC Bioinformatics* **9**, 559 (2008).
- 514 35. Koopmans, F. *et al.* SynGO: An Evidence-Based, Expert-Curated Knowledge Base for the  
515 Synapse. *Neuron* **103**, 217–234.e4 (2019).
- 516 36. Zhu, Y. *et al.* Spatiotemporal transcriptomic divergence across human and macaque brain  
517 development. *Science* **362**, (2018).
- 518 37. Li, M. *et al.* Integrative functional genomic analysis of human brain development and  
519 neuropsychiatric risks. *Science* **362**, (2018).
- 520 38. Langfelder, P., Luo, R., Oldham, M. C. & Horvath, S. Is my network module preserved  
521 and reproducible? *PLoS Comput Biol* **7**, e1001057 (2011).
- 522 39. Velmeshev, D. *et al.* Single-cell analysis of prenatal and postnatal human cortical  
523 development. *bioRxiv* 2022.10.24.513555 (2022) doi:10.1101/2022.10.24.513555.
- 524 40. Bakken, T. E. *et al.* Comparative cellular analysis of motor cortex in human, marmoset  
525 and mouse. *Nature* **598**, 111–119 (2021).
- 526 41. Wu, L. J., Li, X., Chen, T., Ren, M. & Zhuo, M. Characterization of intracortical synaptic  
527 connections in the mouse anterior cingulate cortex using dual patch clamp recording. *Mol*  
528 *Brain* **2**, 1–12 (2009).
- 529 42. Loomba, S. *et al.* Connectomic comparison of mouse and human cortex. *Science* **377**,  
530 eabo0924 (2022).

- 531 43. Workman, A. D., Charvet, C. J., Clancy, B., Darlington, R. B. & Finlay, B. L. Modeling  
532 transformations of neurodevelopmental sequences across mammalian species. *Journal of*  
533 *Neuroscience* **33**, 7368–7383 (2013).
- 534 44. Laubach, M., Amarante, L. M., Swanson, K. & White, S. R. What, If Anything, Is Rodent  
535 Prefrontal Cortex? *eNeuro* **5**, 315–333 (2018).
- 536 45. Huttenlocher, P. R. & Dabholkar, A. S. Regional differences in synaptogenesis in human  
537 cerebral cortex. *J Comp Neurol* **387**, 167–178 (1997).
- 538 46. Sydnor, V. J. *et al.* Neurodevelopment of the association cortices: Patterns, mechanisms,  
539 and implications for psychopathology. *Neuron* **109**, 2820–2846 (2021).
- 540 47. Carlin, R. K., Grab, D. J. & Siekevitz, P. Postmortem Accumulation of Tubulin in  
541 Postsynaptic Density Preparations. *J Neurochem* **38**, 94–100 (1982).
- 542 48. Schanzenbächer, C. T., Langer, J. D. & Schuman, E. M. Time- and polarity-dependent  
543 proteomic changes associated with homeostatic scaling at central synapses. *Elife* **7**, 1–20  
544 (2018).
- 545 49. Hung, A. Y., Sung, C. C., Brito, I. L. & Sheng, M. Degradation of postsynaptic scaffold  
546 GKAP and regulation of dendritic spine morphology by the TRIM3 ubiquitin ligase in rat  
547 hippocampal neurons. *PLoS One* **5**, e9842 (2010).
- 548 50. Chiu, S.-L. *et al.* GRASP1 Regulates Synaptic Plasticity and Learning through Endosomal  
549 Recycling of AMPA Receptors. *Neuron* **93**, 1405–1419.e8 (2017).
- 550 51. Ben-Shalom, R. *et al.* Opposing Effects on NaV1.2 Function Underlie Differences  
551 Between SCN2A Variants Observed in Individuals With Autism Spectrum Disorder or  
552 Infantile Seizures. *Biol Psychiatry* **82**, 224–232 (2017).
- 553 52. Cheon, C. K. *et al.* Autosomal dominant transmission of complicated hereditary spastic  
554 paraplegia due to a dominant negative mutation of KIF1A, SPG30 gene. *Sci Rep* **7**, 1–11  
555 (2017).
- 556 53. Cizeron, M. *et al.* A brainwide atlas of synapses across the mouse life span. *Science* **369**,  
557 270–275 (2020).
- 558 54. Polleux, F., Ince-Dunn, G. & Ghosh, A. Transcriptional regulation of vertebrate axon  
559 guidance and synapse formation. *Nat Rev Neurosci* **8**, 331–340 (2007).
- 560 55. Zhu, F. *et al.* Cell-type-specific visualisation and biochemical isolation of endogenous  
561 synaptic proteins in mice. *European Journal of Neuroscience* **51**, 793–805 (2020).
- 562 56. Zhang, W., Vazquez, L., Apperson, M. & Kennedy, M. B. Citron binds to PSD-95 at  
563 glutamatergic synapses on inhibitory neurons in the hippocampus. *Journal of*  
564 *Neuroscience* **19**, 96–108 (1999).
- 565 57. Bygrave, A. M. *et al.* Btbd11 is an inhibitory interneuron specific synaptic scaffolding  
566 protein that supports excitatory synapse structure and function. *bioRxiv*  
567 2021.11.01.466782 (2021) doi:10.1101/2021.11.01.466782.
- 568 58. Kawaguchi, Y., Karube, F. & Kubota, Y. Dendritic Branch Typing and Spine Expression  
569 Patterns in Cortical Nonpyramidal Cells. *Cerebral Cortex* **16**, 696–711 (2006).
- 570 59. Perez, J. D. *et al.* Subcellular sequencing of single neurons reveals the dendritic  
571 transcriptome of gabaergic interneurons. *Elife* **10**, 1–26 (2021).
- 572 60. Charrier, C. *et al.* Inhibition of SRGAP2 function by its human-specific paralogs induces  
573 neoteny during spine maturation. *Cell* **149**, 923–935 (2012).
- 574 61. Fossati, M. *et al.* SRGAP2 and Its Human-Specific Paralog Co-Regulate the Development  
575 of Excitatory and Inhibitory Synapses. *Neuron* **91**, 356–369 (2016).

- 576 62. Schmidt, E. R. E. *et al.* A human-specific modifier of cortical connectivity and circuit  
577 function. *Nature* **599**, 640–644 (2021).
- 578 63. Tau, G. Z. & Peterson, B. S. Normal Development of Brain Circuits.  
579 *Neuropsychopharmacology* **35**, 147–168 (2010).
- 580 64. Carlin, R. K., Grab, D. J., Cohen, R. S. & Siekevitz, P. Isolation and characterization of  
581 postsynaptic densities from various brain regions: Enrichment of different types of  
582 postsynaptic densities. *Journal of Cell Biology* **86**, 831–843 (1980).
- 583 65. Traunmüller, L., Gomez, A. M., Nguyen, T.-M. & Scheiffele, P. Control of neuronal  
584 synapse specification by a highly dedicated alternative splicing program. *Science* **352**,  
585 982–6 (2016).
- 586 66. Dai, J., Aoto, J. & Südhof, T. C. Alternative Splicing of Presynaptic Neurexins  
587 Differentially Controls Postsynaptic NMDA and AMPA Receptor Responses. *Neuron*  
588 **102**, 993–1008.e5 (2019).
- 589 67. Cox, J. & Mann, M. MaxQuant enables high peptide identification rates, individualized  
590 p.p.b.-range mass accuracies and proteome-wide protein quantification. *Nat Biotechnol*  
591 **26**, 1367–1372 (2008).
- 592 68. Schwanhäusser, B. *et al.* Global quantification of mammalian gene expression control.  
593 *Nature* **473**, 337–342 (2011).
- 594 69. Rath, S. *et al.* MitoCarta3.0: An updated mitochondrial proteome now with sub-organelle  
595 localization and pathway annotations. *Nucleic Acids Res* **49**, D1541–D1547 (2021).
- 596 70. Walikonis, R. S. *et al.* Identification of proteins in the postsynaptic density fraction by  
597 mass spectrometry. *Journal of Neuroscience* **20**, 4069–4080 (2000).
- 598 71. Shin, J. B. *et al.* Molecular architecture of the chick vestibular hair bundle. *Nat Neurosci*  
599 **16**, 365–374 (2013).
- 600 72. Zhang, X. *et al.* Proteome-wide identification of ubiquitin interactions using UbIA-MS.  
601 *Nat Protoc* **13**, 530–550 (2018).
- 602 73. Ritchie, M. E. *et al.* Limma powers differential expression analyses for RNA-sequencing  
603 and microarray studies. *Nucleic Acids Res* **43**, e47 (2015).
- 604 74. Benjamini, Y. & Hochberg, Y. Controlling the False Discovery Rate : A Practical and  
605 Powerful Approach to Multiple Testing. *J. R. Statist. Soc.* **57**, 289–300 (1995).
- 606 75. Gu, Z., Eils, R. & Schlesner, M. Complex heatmaps reveal patterns and correlations in  
607 multidimensional genomic data. *Bioinformatics* **32**, 2847–2849 (2016).
- 608 76. Hoffman, G. E. & Schadt, E. E. variancePartition: Interpreting drivers of variation in  
609 complex gene expression studies. *BMC Bioinformatics* **17**, 17–22 (2016).
- 610 77. Subramanian, A. *et al.* Gene set enrichment analysis: A knowledge-based approach for  
611 interpreting genome-wide expression profiles. *Proc Natl Acad Sci U S A* **102**, 15545–  
612 15550 (2005).
- 613 78. Yu, G., Wang, L. G., Han, Y. & He, Q. Y. ClusterProfiler: An R package for comparing  
614 biological themes among gene clusters. *OMICS* **16**, 284–287 (2012).
- 615 79. Liberzon, A. *et al.* The Molecular Signatures Database Hallmark Gene Set Collection.  
616 *Cell Syst* **1**, 417–425 (2015).
- 617 80. Schindelin, J. *et al.* Fiji: An open-source platform for biological-image analysis. *Nat*  
618 *Methods* **9**, 676–682 (2012).
- 619 81. Stark, C. *et al.* BioGRID: a general repository for interaction datasets. *Nucleic Acids Res*  
620 **34**, 535–539 (2006).

- 621 82. Shannon, P. *et al.* Cytoscape: a software environment for integrated models of  
622 biomolecular interaction networks. *Genome Res* **13**, 2498–504 (2003).
- 623 83. Csardi, G. & Nepusz, T. The igraph software package for complex network research.  
624 *InterJournal Complex Systems* (2006).
- 625 84. Letunic, I., Khedkar, S. & Bork, P. SMART: Recent updates, new developments and  
626 status in 2020. *Nucleic Acids Res* **49**, D458–D460 (2021).
- 627 85. Wood, S. N. Fast stable restricted maximum likelihood and marginal likelihood estimation  
628 of semiparametric generalized linear models. *J R Stat Soc Series B Stat Methodol* **73**, 3–36  
629 (2011).
- 630 86. Keenan, A. B. *et al.* ChEA3: transcription factor enrichment analysis by orthogonal omics  
631 integration. *Nucleic Acids Res* **47**, W212–W224 (2019).
- 632 87. Velmeshev, D. *et al.* Single-cell analysis of prenatal and postnatal human cortical  
633 development. *bioRxiv* 2022.10.24.513555 (2022) doi:10.1101/2022.10.24.513555.
- 634 88. Speir, M. L. *et al.* UCSC Cell Browser: Visualize Your Single-Cell Data. *bioRxiv* **2**,  
635 2020.10.30.361162 (2020).
- 636 89. Friedman, J., Hastie, T. & Tibshirani, R. Regularization Paths for Generalized Linear  
637 Models via Coordinate Descent. *J Stat Softw* **33**, 1–22 (2010).
- 638 90. de Leeuw, C. A., Mooij, J. M., Heskes, T. & Posthuma, D. MAGMA: Generalized Gene-  
639 Set Analysis of GWAS Data. *PLoS Comput Biol* **11**, 1–19 (2015).
- 640 91. Watanabe, K. *et al.* A global overview of pleiotropy and genetic architecture in complex  
641 traits. *Nat Genet* **51**, 1339–1348 (2019).
- 642 92. Karczewski, K. J. *et al.* The mutational constraint spectrum quantified from variation in  
643 141,456 humans. *Nature* **581**, 434–443 (2020).
- 644 93. Turner, T. N. *et al.* denovo-db: a compendium of human de novo variants. *Nucleic Acids*  
645 *Res* **45**, D804–D811 (2017).
- 646 94. Heyne, H. O. *et al.* De novo variants in neurodevelopmental disorders with epilepsy. *Nat*  
647 *Genet* **50**, 1048–1053 (2018).
- 648 95. Rees, E. *et al.* De novo mutations identified by exome sequencing implicate rare missense  
649 variants in SLC6A1 in schizophrenia. *Nat Neurosci* **23**, 179–184 (2020).
- 650 96. Howrigan, D. P. *et al.* Exome sequencing in schizophrenia-affected parent–offspring trios  
651 reveals risk conferred by protein-coding de novo mutations. *Nat Neurosci* **23**, 185–193  
652 (2020).
- 653 97. Ruderfer, D. M. *et al.* Genomic Dissection of Bipolar Disorder and Schizophrenia,  
654 Including 28 Subphenotypes. *Cell* **173**, 1705–1715.e16 (2018).
- 655 98. Grove, J. *et al.* Identification of common genetic risk variants for autism spectrum  
656 disorder. *Nat Genet* **51**, 431–444 (2019).
- 657 99. Howard, D. M. *et al.* Genome-wide meta-analysis of depression identifies 102  
658 independent variants and highlights the importance of the prefrontal brain regions. *Nat*  
659 *Neurosci* **22**, 343–352 (2019).
- 660 100. Demontis, D. *et al.* Genome-wide analyses of ADHD identify 27 risk loci, refine the  
661 genetic architecture and implicate several cognitive domains. *Nature Genetics* 2023 55:2  
662 **55**, 198–208 (2023).
- 663 101. Gandal, M. J. *et al.* Transcriptome-wide isoform-level dysregulation in ASD,  
664 schizophrenia, and bipolar disorder. *Science* **362**, eaat8127 (2018).

## 665 666 **Methods**

667 Brain tissue samples

668 Acquisition of all second-trimester primary human tissue samples (Supplementary Table 1a) was  
669 approved by the UCSF Human Gamete, Embryo and Stem Cell Research Committee (study  
670 number 10-05113). All experiments were performed in accordance with protocol guidelines.  
671 Informed consent was obtained before sample collection and use for this study. After tissue  
672 acquisition, the cortical plate and subplate were dissected and frozen at  $-80^{\circ}\text{C}$ .

673 Thirty-four de-identified snap-frozen post-mortem prefrontal cortex (PFC) tissue samples without  
674 known neurological disorders were obtained from the University of Maryland Brain and Tissue  
675 Bank through NIH NeuroBioBank and the Pediatric Brain Tissue Bank at UCSF (Supplementary  
676 Table 1a).

677 Twenty-two de-identified snap-frozen post-mortem primary visual cortex (V1) tissue samples  
678 without known neurological disorders were obtained from the University of Maryland Brain and  
679 Tissue Bank through NIH NeuroBioBank (Supplementary Table 1b).

680 Three adult cortical samples were obtained from neurosurgical operations (Supplementary Table  
681 1c). In two cases, the reason for surgery was tumor resection and in one, focal cortical dysplasia  
682 type 2b treatment. In all cases, the tissue samples were collected from peripheral regions removed  
683 together with the affected regions. The samples were snap-frozen in liquid nitrogen and stored at  
684  $-80^{\circ}\text{C}$  before further processing.

685 Macaque samples were obtained from Oregon National Primate Research Center, Southwest  
686 National Primate Research Center, Wisconsin National Primate Research Center, Dr. Alex Pollen  
687 at UCSF, and Dr. Nenad Sestan at Yale University (Supplementary Table 8a).

688 Mouse experiments were approved by UCSF Institutional Animal Care and Use Committee  
689 (IACUC) and performed in accordance with relevant institutional guidelines. Neocortices from  
690 C57BL/6J mice were dissected and frozen at  $-80^{\circ}\text{C}$  (Supplementary Table 8b).

691 Subcellular fractionation and post-synaptic density (PSD) isolation

692 Subcellular fractionation and PSD isolation were done as previously described<sup>29</sup>. Briefly, about  
693 300 to 2000 mg of human brain tissue (dependent on the age group) was thawed on ice and cut  
694 into small pieces. It was then homogenized using a 10 mL tissue grinder in 3 mL homogenization  
695 buffer (0.32 M sucrose, 2 mM EDTA, and 4 mM HEPES, pH 7.4) with freshly added protease and  
696 phosphatase inhibitors (Roche). Postnuclear supernatants were obtained via  $1,000 \times g$  spin. The  
697 supernatant (S1) was spun at  $10,000 \times g$  for 15 min, and the pelleted membranes were resuspended  
698 in 10 mL homogenization buffer and spun again to obtain P2'. This pellet was lysed by 10 mL  
699 hypoosmotic shock in 4 mM HEPES (pH7.4) buffer and incubated for 30 min at  $4^{\circ}\text{C}$ . This was  
700 followed by a spin at  $25,000 \times g$  for 20 min. The pellet (P3) was layered onto a 0.8/1.0/1.2 M  
701 discontinuous sucrose gradient and spun at  $150,000 \times g$  for 2 h. Synaptic plasma membranes (SPM)  
702 were recovered from the 1.0/1.2 M interface and pelleted. These membranes were extracted with  
703 3 mL 0.5% Triton X-100 for 15 min and pelleted with a  $32,000 \times g$  spin for 20 min (PSD I). For  
704 mass spectrometry (MS) and Western blot analysis, fractions obtained by subcellular fractionation  
705 were lysed by sonication. Protein concentrations were determined using the BCA assay (Pierce).

706 Macaque and mouse PSD samples were prepared in the same way.

707 Western blot



708 LDS sample buffer (Invitrogen) with a reducing agent was added to each protein lysate, followed  
709 by a 10 min incubation at 95 °C. Samples were spun down and electrophoresed on a 4–12% Bis-  
710 Tris gel and transferred to a nitrocellulose membrane. Total protein was quantified by Revert Total  
711 Protein Stains (LI-COR). The membrane was then blocked for 1 h with Intercept (TBS) Blocking  
712 Buffer (LI-COR) before primary antibody incubation overnight. After secondary antibody  
713 incubation, the membrane was imaged using Odyssey Classic or Odyssey CLx (LI-COR).

714 The following antibodies were used: GRIN2B (Abcam, ab93610, 1:1,000), DLG2 (NeuroMab, 75-  
715 284, 1:1,000), GRIA1 (Millipore, AB1504, 1:1,000), DLG4 (NeuroMab, 75-028, 1:1,000), SYP  
716 (Sigma, S5768, 1:1,000), GAPDH (Cell Signaling Technology, 2118S, 1:1,000), ARHGEF7  
717 (Sigma, 07-1450-I, 1:1,000), PREX1 (Sigma, HPA001927-100UL, 1:1000),  $\beta$ -Tubulin (Cell  
718 Signaling Technology, 2146S, 1:1,000), Phospho-PAK (Cell Signaling Technology, 2606S,  
719 1:1,000), PAK (Cell Signaling Technology, 2604S, 1:1,000), Phospho-CFL (Cell Signaling  
720 Technology, 3311S, 1:1000), CFL (Cell Signaling Technology, 5175S, 1:1000).

### 721 Transmission electron microscopy

722 Human PSD I pellets prepared from gestational week (GW) 23 samples were fixed with 3%  
723 glutaraldehyde (Electron Microscopy Sciences, EMS) for 10 min at 4 °C, washed three times with  
724 0.1M phosphate buffer (PB), and post-fixed with 2% osmium tetroxide (EMS) in 0.1M PB for 1 h  
725 at room temperature. Dehydration in graded series of ethanol (30, 50, and 70%) was followed by  
726 2% uranyl acetate (EMS) incubation for 2.5 h. Samples were rinsed with 70%, 96%, and 100%  
727 ethanol, washed two times with propylene oxide (EMS), embedded in Durcupan resin (Sigma-  
728 Aldrich), and allowed to polymerize at 69 °C for 72 h. Ultrathin sections (60–70 nm) were  
729 sectioned with a diamond knife (DiATOME) in a UC7 ultramicrotome (Leica), stained with lead  
730 citrate, and examined under a transmission electron microscope (Tecnai Spirit G2, FEI,  
731 Netherlands) using a digital camera (Morada, Soft Imaging System, Olympus, Japan).

### 732 Sample quality control, digestion, and LC-MS/MS analysis.

733 The integrity of sample synaptic proteomes was checked before MS analysis using the HUman  
734 Synapse Proteome Integrity Ratio (HUSPIR)<sup>30</sup>. PSD samples with HUSPIR > 2 were deemed  
735 good, and those with 1 < HUSPIR < 2 were deemed fair. Samples with HUSPIR  $\leq$  1 were excluded  
736 from further analysis.

737 Five micrograms of isolated PSD samples were electrophoresed on a 4–12% Bis-Tris gel for 20  
738 min. Proteins were visualized by Bio-Safe Coomassie stain (BIO-RAD) and excised from the gel.  
739 Individual gel piece was subjected to in-gel digestion using trypsin (Promega). The resulting dried  
740 peptides were analyzed in technical duplicate on a ThermoFisher Orbitrap Fusion Lumos Tribrid  
741 mass spectrometry system equipped with an EASY-nLC 1200 ultrahigh-pressure liquid  
742 chromatography system interfaced via a Nanospray Flex nanoelectrospray source. Samples were  
743 injected into a C18 reverse phase column (25 cm x 75  $\mu$ m packed with ReprosilPur C18 AQ 1.9  
744  $\mu$ m particles). Peptides were separated by an organic gradient from 5 to 30% ACN in 0.02%  
745 heptafluorobutyric acid over 180 min at a flow rate of 300 nL/min for the phosphorylated peptides  
746 or unmodified peptides for global abundance. Spectra were continuously acquired in a data-  
747 dependent manner throughout the gradient, acquiring a full scan in the Orbitrap (at 120,000  
748 resolution with an AGC target of 400,000 and a maximum injection time of 50 ms) followed by  
749 as many MS/MS scans as could be acquired on the most abundant ions in 3 s in the dual linear ion  
750 trap (rapid scan type with an intensity threshold of 5000, HCD collision energy of 32%, AGC  
751 target of 10,000, maximum injection time of 30 ms, and isolation width of 0.7 m/z). Single and

752 unassigned charge states were rejected. Dynamic exclusion was enabled with a repeat count of 2,  
753 an exclusion duration of 20 s, and an exclusion mass width of  $\pm 10$  ppm.

#### 754 Protein identification, quantification, and potential contaminants removal

755 Protein identification and quantification were done using MaxQuant v1.6.11.0<sup>67</sup>. Spectra from the  
756 human, macaque, and mouse raw files were matched to the reference proteomes from UniProt  
757 (Homo sapiens UP000005640\_9606, Macaca mulatta UP000006718\_9544, and Mus musculus  
758 UP000000589\_10090 respectively). Default settings of MaxQuant with FDR = 0.01 were used  
759 except that “Match between runs” was enabled to improve proteome coverage with an alignment  
760 window of 20 min and a match time window of 0.7 min. The iBAQ value for each protein group  
761 was calculated<sup>68</sup>.

762 Potential external contaminants including keratins and proteins known to be localized at  
763 mitochondria<sup>69</sup>, a principal contaminant in PSD preparation<sup>70</sup>, were excluded. Moreover, because  
764 some identified proteins could be non-PSD proteins artificially bound to the PSD in the post-  
765 mortem condition<sup>47</sup>, we curated a list of proteins that have been identified in non-post-mortem  
766 brain tissues by combining our data and data from Bayés et al., 2011<sup>9</sup>. This list was used to filter  
767 the identified PSD proteins so that those only present in post-mortem brain samples were excluded.  
768 After contaminant filtration, the remaining proteins were considered present in an age group if  
769 more than half of the samples in that group had the protein identified by MS/MS.

#### 770 Data normalization, imputation, and integrity effect correction

771 Our initial analysis focused on the human PFC dataset consisting of the 20 cortical samples without  
772 area information in the second trimester and 34 PFC samples from the third trimester to young  
773 adulthood. After filtering out potential contaminants, the iBAQ values of the remaining proteins  
774 were used to calculate the normalized molar intensity riBAQ<sup>71</sup>:

$$775 \quad riBAQ_i = \frac{iBAQ_i}{\sum_1^n iBAQ_i}$$

776 The riBAQ values were multiplied by a scale factor of  $10^6$  and log2-transformed to obtain the  
777 abundance values for each protein. After log-transformation, 1765 human PSD proteins missing  
778 in less than three samples in any age group (either by MS/MS or by matching) were included for  
779 further analysis. Next, abundance values were normalized by variance stabilizing transformation,  
780 and missing values were imputed using the “MinProb” method ( $q = 0.01$ ), both of which were  
781 implemented using the R package DEP<sup>72</sup>.

782 Linear models combined with empirical Bayes methods were used for the differential abundance  
783 analysis of the human samples. We accounted for the fact that synaptic proteome integrity could  
784 affect the abundance values. The following model was fit:

$$785 \quad abundance \sim age\ group + integrity$$

786 where *age group* is one of the six sample age groups, and *integrity* is the HUSPIR category (good  
787 or fair). This was done using the R package limma<sup>73</sup>. After the model was fitted, a pairwise  
788 comparison was made to identify proteins with differential abundance between two age groups.  
789 Proteins with a log2 fold change of at least one and an adjusted p-value<sup>74</sup> of the moderated t-test  
790 less than 0.05 were selected as proteins with differential abundance. The effect of integrity was  
791 removed using the removeBatchEffect function in limma. The final corrected abundance matrix  
792 can be found in Supplementary Table 2a.

793 A similar differential abundance analysis was done with the macaque and mouse samples, except  
794 that the integrity covariate was removed in the linear model. The final abundance matrix can be  
795 found in Supplementary Table 9a and Supplementary Table 10a.

796 A similar differential abundance analysis was done with the human V1 dataset consisting of the  
797 same 20 cortical samples without area information in the second trimester as the PFC dataset and  
798 22 V1 samples from the third trimester to young adulthood. Variance stabilizing transformation  
799 was done using the same model from the PFC dataset. The final corrected abundance matrix after  
800 applying the removeBatchEffect function can be found in Supplementary Table 5a.

#### 801 Dimensionality reduction and clustering

802 Dimensionality reduction was done by the principal component analysis (PCA). The first two  
803 principal components were used for the PCA plots. Heatmaps were generated using the R package  
804 ComplexHeatmap<sup>75</sup>. Samples and proteins were clustered based on the Spearman correlation  
805 distance.

#### 806 Variance partitioning

807 Variance partitioning was done using the R package variancePartition<sup>76</sup>. Age group, processing  
808 batch, PSD quality, and sex of the sample donor were included in the formula.

#### 809 Gene set enrichment analysis using MSigDB gene sets

810 Age specificity for each protein was calculated by comparing samples within an age group to all  
811 other samples outside the age group using linear models combined with empirical Bayes methods  
812 implemented in limma. The resulting moderated t statistics of each protein were ranked and used  
813 as input for gene set enrichment analysis (GSEA)<sup>77</sup> using the R package clusterProfiler<sup>78</sup>. GSEA  
814 was carried against the MSigDB C2 canonical pathways, which contain curated gene sets  
815 representing different molecular pathways<sup>79</sup>. Only pathway sets with gene numbers between 10  
816 and 500 were used for the analysis.

#### 817 Immunohistochemistry and confocal imaging

818 Prenatal human tissue samples and mouse tissue samples were fixed in 4% paraformaldehyde in  
819 PBS at 4 °C overnight. The samples were cryoprotected in 15% and 30% sucrose in PBS and  
820 frozen in OCT. Samples were sectioned at a thickness of 15 µm, air-dried, and rehydrated in PBS.  
821 Postnatal unfixed frozen tissue samples were sectioned at a thickness of 15 µm, air-dried, fixed in  
822 4% paraformaldehyde in PBS for 10 min, and washed three times with PBS. Antigen retrieval was  
823 done using citrate-based Antigen Unmasking Solution (Vector Laboratory) at 95 °C for 10 min.  
824 The slides were then washed in PBS and blocked in PBS-based blocking buffer containing 10%  
825 donkey serum, 0.2% gelatin, and 0.1% Triton X-100 at room temperature for 1 h. After blocking,  
826 slides were incubated with primary antibodies in the blocking buffer at 4 °C overnight. The slides  
827 were washed in PBS three times and incubated with secondary antibodies in the blocking buffer  
828 at room temperature for 2 h. The slides were then washed in PBS twice, counterstained with DAPI,  
829 and washed in PBS once more. Slides were mounted with coverslips with ProLong Gold  
830 (Invitrogen). Confocal images were acquired with a Leica TCS SP8 using a 63× oil immersion  
831 objective. Acquired images were processed using Imaris (Oxford Instruments) and Fiji<sup>80</sup>. The  
832 following antibodies were used: DLG4 (NeuroMab, 75-028, 1:250), DLG4 (Synaptic Systems,  
833 N3702-At488-L, 1:250), RPS6 (Cell Signaling Technology, 2217S, 1:200), CTNNB1 (Cell  
834 Signaling Technology, 8480S, 1:100), GDI1 (Proteintech, 10249-1-AP, 1:100), CFL1 (Cell

835 Signaling Technology, 5175S, 1:250), DBN1 (Abcam, ab11068, 1:200), DNBL (proteintech,  
836 13015-1-AP, 1:100), ARHGEF7 (Sigma, 07-1450-I, 1:200).

837 Colocalization analysis was done using Imaris. Protein puncta were identified based on signal  
838 intensity and local contrast. Puncta of two different proteins within 0.5  $\mu\text{m}$  were considered co-  
839 localized. DBN1, DNBL, and ARHGEF7 abundances at the PSD were quantified using Imaris.  
840 The DLG4 puncta were identified based on signal intensity and local contrast. These DLG4 puncta,  
841 deemed as the PSD loci, were used to create a mask channel. Intensities of DBN1, DNBL, or  
842 ARHGEF7 were then quantified within the mask channel.

#### 843 Weighted gene co-expression network analysis (WGCNA)

844 WGCNA was done using the R package WGCNA <sup>34</sup>.

845 For the human samples, the blockwiseModules function (power = 20, corType = “pearson”,  
846 networkType = “signed”, deepSplit = 2, minModuleSize = 45, reassignThreshold = 1e-6,  
847 mergeCutHeight = 0.15, minKMEtoStay = 0.3, numericLabels = F, pamRespectsDendro = F) was  
848 used to build a signed weighted correlation network. In total, four modules plus the grey module  
849 for unassigned proteins were identified. Module memberships and module eigengene values of the  
850 samples are available in Supplementary Table 3.

#### 851 Protein-protein interaction (PPI) enrichment analysis by Monte Carlo permutation tests

852 The PPI network consisting of interactions between human proteins and those between mouse  
853 proteins was downloaded from the BioGRID database (<https://thebiogrid.org/>) <sup>81</sup>. We used the PPI  
854 network consisting of all the module genes in the human PSD as the background PPI network. For  
855 each module, we constructed the module protein interaction network by extracting the interactions  
856 connecting all the proteins in the module and calculated the observed number of interactions. We  
857 then randomly sampled the same number of proteins with similar degree distribution from the  
858 background PPI network and calculated the number of interactions in the random network. We  
859 repeated this randomization process 100,000 times and calculated the p-value as the fraction of the  
860 random numbers of interactions that are greater than the observed number of interactions.

#### 861 Statistical overrepresentation test using MSigDB gene sets

862 The one-sided hypergeometric test implemented in clusterProfiler was used to identify  
863 overrepresented pathways in each protein module. The MSigDB C2 canonical pathways were used  
864 as input gene sets. The union of genes encoding PSD proteins and those expressed in the human  
865 neocortex curated using the BrainSpan RNA-seq data was used as the background. To define genes  
866 expressed in the human neocortex, we downloaded the developing human brain RNA-Seq data  
867 from the BrainSpan database (<http://www.brainspan.org>). The neocortical samples of the  
868 BrainSpan data that have RNA integrity numbers  $\geq 8$  were temporally divided into prenatal and  
869 postnatal stages. Genes with RPKM  $\geq 1$  in at least half of the neocortical samples at either stage  
870 were defined as genes expressed in the human neocortex. Only pathway sets with gene numbers  
871 between 10 and 500 were used for the analysis.

#### 872 SynGO enrichment analysis

873 SynGO (release 1.1) enrichment analysis was done using the online tool at <https://syngoportal.org/>  
874 <sup>35</sup>. We used the same background gene list as the above statistical overrepresentation test.

#### 875 PPI-co-abundance network analysis and visualization

876 The pairwise topological overlap similarity scores of all human PSD protein pairs were calculated  
877 by WGCNA. Protein pairs with topological overlap similarity scores in the top 10% were  
878 considered co-expressed. Protein pairs that are co-expressed and interacting with each other in the  
879 BioGRID database were deemed connected in the PPI-co-abundance network. Subnetworks were  
880 generated within each module. All network plots were constructed using Cytoscape 3.8.2<sup>82</sup>. The  
881 shortest path lengths between proteins were calculated using igraph<sup>83</sup>. The average length within  
882 pathway proteins was compared to that between the pathway proteins and non-pathway proteins  
883 in the network by the one-sided Wilcoxon rank-sum test.

#### 884 Protein domain analysis

885 Protein domain information of all PSD proteins was downloaded from the SMART database  
886 (<https://smart.embl.de/>)<sup>84</sup> and summarized in Supplementary Table 4a. Domains present in more  
887 than six PSD proteins were included in Fig. 2d and Extended Data Fig. 9. Domains were clustered  
888 based on the Pearson correlation distance in Fig. 2d and Jaccard distance in Extended Data Fig. 9.

#### 889 RhoGAP and RhoGEF specificity

890 The target specificity of individual RhoGAPs and RhoGEFs was hand-annotated based on a  
891 literature review. The annotation results were summarized in Supplementary Table 4b,c.

#### 892 Comparison between PSD proteomic data and bulk transcriptomic data

893 The BrainSpan human brain bulk RNA-seq data were downloaded from the PsychENCODE  
894 website (<http://evolution.psychencode.org/>)<sup>36</sup>. Neocortical samples older than GW16 were  
895 included for analysis. Transcripts were filtered to only include those encoding PSD proteins and  
896 normalized to obtain the TPM values. Log<sub>2</sub>(TPM+1) values were used for downstream analysis.

897 Module preservation analysis was done using the modulePreservation function in WGCNA<sup>38</sup>. We  
898 performed the permutation 500 times to obtain the  $Z_{summary}$  statistics and composite module  
899 preservation statistic medianRank.

900 To estimate the correlation at the individual PSD protein level between the proteomic data and  
901 transcriptomic data, we first imputed the transcriptomic profiles of human cortical samples used  
902 to generate our proteomic data. To do so, we trained a generalized additive model by regressing  
903 the transcriptome of human cortical samples against their ages using the R package mgcv 1.8-40  
904<sup>85</sup>. We then predicted the corresponding transcriptomic profiles of our PSD samples based on their  
905 ages and calculated the Spearman correlation coefficients between RNA and protein of individual  
906 PSD proteins (Supplementary Table 6). The Kruskal-Wallis rank sum test with *post hoc* Dunn's  
907 test was used to compare differences in correlation coefficients between PSD modules.

#### 908 ChEA3 transcription factor enrichment analysis

909 ChEA3 analysis was done using the online tool at <https://maayanlab.cloud/chea3/><sup>86</sup>. Results were  
910 listed in Supplementary Table 6e.

#### 911 Developing human brain single-nucleus RNA sequencing (snRNA-seq) data analysis

912 SnRNA-seq data from the developing human neocortex<sup>87</sup> were downloaded from the UCSC Cell  
913 Browser<sup>88</sup>. UMAP coordinates from the original authors were used. The identity of specific  
914 lineages and cell types was reannotated based on the expression of known marker genes (Extended  
915 Data Fig. 12). Only EN\_IT, EN\_non-IT, IN\_MGE, and IN\_CGE were included for further analysis.  
916 Pseudobulk samples were constructed by aggregating the raw counts of all the cells within the

917 same cell type. Counts for genes encoding PSD proteins were extracted from the pseudobulk data,  
918 normalized for sequencing depth, and log-transformed to obtain the  $\log_2(\text{CPM} + 1)$  values  
919 (Supplementary Table 7a). Gene expression levels were standardized by z-transformation across  
920 pseudobulk samples and summarized in Fig. 3e.

#### 921 Adult human brain single-cell RNA sequencing (scRNA-seq) data analysis

922 scRNA-seq data from the adult human motor cortex<sup>40</sup> were downloaded from the UCSC Cell  
923 Browser<sup>88</sup>. Only neocortical neurons were included for further analysis. Pseudobulk samples were  
924 constructed by aggregating the raw counts of all the cells within the same neuronal subtype  
925 annotated by the original authors. Counts for genes encoding PSD proteins were extracted from  
926 the pseudobulk data, normalized for sequencing depth, and log-transformed to obtain the  
927  $\log_2(\text{CPM} + 1)$  values (Supplementary Table 7b). Counts for transcription factors regulating PSD  
928 modules were extracted from the original pseudobulk data without re-normalizing for sequencing  
929 depth (Supplementary Table 7c,d). Gene expression levels were standardized by z-transformation  
930 across pseudobulk samples and summarized in Fig. 3f,g.

#### 931 Correlation analysis between species and regions

932 The orthologs of genes encoding human PSD proteins were obtained from Ensembl. Only PSD  
933 proteins with one-on-one orthologs present in the PSD of all three species (854 proteins) were  
934 included for further analysis. The riBAQ values of the filtered data were re-normalized to obtain  
935 updated riBAQ values comparable between all species and regions (Supplementary Table 11a).  
936 Pairwise correlations between samples were obtained by calculating the Pearson correlation  
937 coefficients. The detailed results can be found in Supplementary Table 11.

#### 938 Prediction of equivalent human PSD ages and comparison of PSD maturation rates

939 To predict equivalent human PSD ages, we log-transformed the age (post-conceptual days) of  
940 all samples in the human PFC dataset and then trained a regularized linear model by regressing the  
941 transformed ages against the riBAQ values of all PSD proteins. Specifically, ridge regression was  
942 performed using the R package *glmnet*<sup>89</sup> with  $\lambda$  (equals 0.4466836) selected by ten-fold cross-  
943 validation. The equivalent human PSD ages for macaque and mouse samples were then predicted  
944 using the trained model and listed in Supplementary Table 11b.

945 The predicted PSD ages of human, macaque, and mouse samples were regressed against the real  
946 post-conceptual ages using a linear regression model to obtain the slope coefficients as an  
947 estimator of the PSD maturation rate. For the macaque samples, because the PSD maturation rate  
948 appears to be different before and after the age of one year, the predicted PSD ages were regressed  
949 against the real post-conceptual ages using a linear spline model with the knot set at post-  
950 conceptual day 330 using the R package *lspline*.

951 Similar predictions were made based on the human V1 dataset. For ridge regression,  $\lambda$  (equals  
952 0.7943282) was selected by ten-fold cross-validation. The equivalent human PSD ages based on  
953 the human V1 dataset were listed in Supplementary Table 11c.

#### 954 Primary neuronal culture

955 Primary human cortical neurons were prepared from GW21 to GW23 human dorsal cortical tissue  
956 samples. The cortical plate and subplate were dissected and dissociated using the Papain  
957 Dissociation System (Worthington Biochemical). Dissociated neurons were resuspended in a  
958 plating medium (Neurobasal medium supplemented with 1xB27, 2 mM GlutaMAX, and

959 antibiotics) and plated into tissue culture plates coated with PEI-laminin or containing a 12 mm  
960 coverslip pre-coated with PDL and laminin (Corning 354087) at the density of 100K cells/cm<sup>2</sup>.  
961 Cells were cultured in a humidified incubator with 5% CO<sub>2</sub> and 8% O<sub>2</sub>. On days in vitro (DIV) 1,  
962 the medium was changed to maturation medium (BrainPhys medium supplemented with 1 × B27,  
963 1 × N2, 20 ng/mL BDNF, 20 ng/mL GDNF, 1mM dibutyryl-cAMP, 200 nM ascorbic acid, 1  
964 µg/mL laminin, and antibiotics). Half of the medium was changed with fresh medium every 3–4  
965 days until harvest.

966 Primary mouse cortical neurons were prepared from postnatal day (P) 0 C57BL6/J mice. The  
967 neocortices were dissected, dissociated, and plated using the same procedure as primary human  
968 neurons.

#### 969 Synaptosome preparation from cultured primary neurons

970 About two million neurons were harvested at the indicated DIV in 2 mL homogenization buffer  
971 (0.32 M sucrose, 2 mM EDTA, and 4 mM HEPES, pH 7.4) with freshly added protease and  
972 phosphatase inhibitors (Roche) and homogenized using a 10 mL tissue grinder. Postnuclear  
973 supernatants were obtained via 1,000 × g spin. The supernatant (S1) was spun at 10,000 × g for 15  
974 min, and the pelleted membranes were resuspended in 1 mL 0.8M sucrose buffer and spun at  
975 20,000 × g for 30 min. The pellet (synaptosomes) was resuspended in the homogenization buffer  
976 and stored at –80 °C before Western blot analysis. Protein concentrations were determined using  
977 the BCA assay (Pierce).

#### 978 Plasmid cloning

979 pmCherry-1 (632525, Clontech) was used as the backbone and control vector for the  
980 overexpression experiments. mCherry-ARHGEF7 was a gift from Dorus Gadella (Addgene #  
981 129611). The cDNA of RASGRF2 was cloned into pmCherry-1 from R777-E241 Hs.RASGRF2,  
982 a gift from Dominic Esposito (Addgene # 70525). pLKO-RFP-shCntrl, a gift from William Kaelin  
983 (Addgene # 69040), was used as the backbone and control vector for the knockdown experiments.  
984 Sequences of shRNAs against *ARHGAP23* or *SRGAPI* can be found in Supplementary Table 12a.

#### 985 Validation of shRNA knockdown efficiency

986 HEK293T (ATCC CRL-3216) cultured in Dulbecco's Modified Eagle Medium (DMEM)  
987 (Corning) containing 10% Fetal Bovine Serum (Hyclone) and antibiotics (Penicillin/Streptomycin)  
988 were plated in 12-well plates. The next day, 1 µg of corresponding shRNA vectors were transfected  
989 into the cells using Lipofectamine 3000 (Invitrogen). Cells were harvested 48 hours after  
990 transfection for mRNA extraction using the RNAeasy mini plus kit (Qiagen). RNA quantity and  
991 quality were checked using NanoDrop 1000 (Thermo Scientific). qRT-PCR was performed using  
992 the ViiA 7 Real-time PCR System with PowerUp SYBR Green Master Mix and analyzed with  
993 comparative Ct method normalized against the housekeeping gene *GAPDH*. Primers used were  
994 listed in Supplementary Table 12b.

#### 995 Plasmid DNA transfection into primary neurons and immunocytochemistry

996 Human neurons were transfected on DIV28 with pEGFP-C1 (0.3 µg/well, Clontech) plus vectors  
997 expressing mCherry, mCherry-ARHGEF7, mCherry-RASGRF2, tRFP-shControl, tRFP-  
998 sh*ARHGAP23*-1, tRFP-sh*ARHGAP23*-2, tRFP-sh*SRGAPI*-1, or tRFP-sh*SRGAPI*-2 (0.7 µg/well)  
999 with lipofectamine 2000. On DIV42, human neurons were fixed with 4% formaldehyde/4%  
1000 sucrose in PBS and permeabilized/blocked with PBS-based blocking buffer containing 10%  
1001 donkey serum, 0.2% gelatin, and 0.1% Triton X-100 at room temperature for 1 h. Samples were

1002 then incubated with primary antibodies at 4 °C overnight. The next day, samples were washed in  
1003 PBS three times and incubated with secondary antibodies in the blocking buffer at room  
1004 temperature for 1 h. Samples were then washed in PBS twice, counterstained with DAPI, and  
1005 washed in PBS once more. Z-stack images were acquired with a Leica TCS SP8 using a 63× oil  
1006 immersion objective. Dendritic spine analysis was performed using Imaris (Oxford Instruments).  
1007 Spine density and morphology were measured from secondary or tertiary dendrites. Automatic  
1008 spine classification was done using the “Classify Spines Xtension” in Imaris with the following  
1009 rules: Stubby—length(spine)<1 μm; Mushroom—length(spine)<3 μm and max\_width(head) >  
1010 mean\_width(neck)\*2; Long Thin—length(spine)<3 μm but not Mushroom; Filopodia—  
1011 length(spine)>=3 μm. Mouse neurons were transfected on DIV5 and analyzed on DIV8 in a similar  
1012 manner.

1013 For surface GRIA1 staining, after fixation, neurons were blocked by PBS-based blocking buffer  
1014 containing 10% donkey serum and 0.2% gelatin at room temperature for 1 h. Samples were then  
1015 incubated with primary antibodies against extracellular GRIA1 under the non-permeabilized  
1016 condition at room temperature for 1 h. Next, samples were washed in PBS three times and  
1017 permeabilized/blocked with blocking buffer containing 0.1% Triton X-100 at room temperature  
1018 for 1 h. Samples were then incubated with primary antibodies against intracellular proteins at 4 °C  
1019 overnight. The rest steps of the procedure were the same as mentioned above.

1020 The following antibodies were used: GFP (Aves, GFP-1020, 1:1000), mCherry (Invitrogen,  
1021 M11217, 1:500), SYN1 (Cell Signaling Technology, 5297S, 1:250), DLG4 (Synaptic Systems,  
1022 N3702-AF647-L, 1:250), tRFP (OriGene, TA150061, 1:250), GRIA1 (Alomone, AGC-004, 1:25).

### 1023 Whole-cell recording of primary human cortical neurons

1024 Human neurons transfected with pEGFP-C1 plus vectors expressing mCherry, mCherry-  
1025 ARHGEF7, or mCherry-RASGRF2 were recorded between DIV42 and DIV49. Whole-cell  
1026 recordings were performed in the maturation medium supplemented with 1 mM TTX at room  
1027 temperature. The voltage was set at -60 mV. Recording pipettes (4-10 mOhm) were filled with  
1028 the intrapipette solution containing 140 mM K-gluconate, 2 mM MgCl<sub>2</sub>, 10 mM HEPES, 0.2 mM  
1029 EGTA, 4 mM MgATP, 0.3 mM NaGTP, 10 mM Phosphocreatine d-tris, and 0.25% biocytin.  
1030 Signals were collected at a sampling rate of 10K, using a 10K Bessel filter (MultiClamp 700B,  
1031 Axon Instruments, Molecular Devices) and digitized (Digidata, Axon Instruments, Molecular  
1032 Devices). Putative mEPSC events were extracted in the open-source software Stimfit 0.15.8  
1033 (<https://github.com/neurodroid/stimfit>).

### 1034 MAGMA analysis of PSD modules using GWAS data of human cognitive functions

1035 MAGMA v1.09<sup>90</sup> was used to determine whether human PSD modules are enriched for common  
1036 variants associated with human cognitive function.

1037 GWAS summary statistics for human cognitive function studies conducted by the UK Biobank  
1038 were downloaded from the GWAS ATLAS resource (<https://atlas.ctglab.nl/>)<sup>91</sup>. We analyzed  
1039 GWAS data of Reaction Time Test for processing speed, Fluid Intelligence Test for Fluid  
1040 intelligence, Trail Making Test Part B for executive function, Pairs Matching Test for visual  
1041 declarative memory, Numeric Memory Test for working memory, and Prospective Memory Test  
1042 for prospective memory.

1043 For gene analysis in MAGMA, the 1,000 Genomes European panel was used to estimate LD  
1044 between SNPs, and the SNP-wise Mean model was used as the gene analysis model. For gene-set



1045 analysis, several common technical confounders are included in the linear regression model as  
1046 covariates. These confounders include gene size, gene density, the inverse of the mean minor allele  
1047 count of variants, and their log-transformed values. The resulting nominal p-values were adjusted  
1048 using the Benjamini-Hochberg method <sup>74</sup>. The detailed results can be found in Supplementary  
1049 Table 13a.

#### 1050 Module enrichment of activity-dependent proteins

1051 Lists of proteins whose abundances depend on neuronal activities were obtained from  
1052 Schanzenbächer et al., 2018 <sup>48</sup>. The rat protein list was converted to human genes using ortholog  
1053 data obtained from the Alliance of Genome Resources (<https://www.alliancegenome.org/>). The  
1054 one-sided hypergeometric test was used to determine if there was a significant overlap with  
1055 individual PSD modules. The union of genes encoding PSD proteins and those expressed in the  
1056 human neocortex was used as the background. The resulting nominal p-values were adjusted using  
1057 the Benjamini-Hochberg method. The detailed results can be found in Supplementary Table 13b.

#### 1058 Gene constraint analysis

1059 LOEUF scores, missense Z-scores, and synonymous Z-scores for all human genes were  
1060 downloaded from gnomAD v2.1.1 ([gnomad.broadinstitute.org/](https://gnomad.broadinstitute.org/)) <sup>92</sup>. The union of genes encoding  
1061 PSD proteins and those expressed in the human neocortex was used as the background. Data were  
1062 plotted using the `geom_boxplot()` function from the R package `ggplot2` with default settings for  
1063 elements. The Kruskal-Wallis rank sum test with *post hoc* Dunn's test was used to compare  
1064 differences in scores between each category of genes.

#### 1065 Module enrichment of de novo variants associated with neurodevelopmental disorders

1066 *De novo* variants in neurodevelopmental disorders, including epilepsy, developmental delay,  
1067 autism spectrum disorder, intellectual disability, and schizophrenia, were obtained from the  
1068 `denovo-db` v.1.6.1 (<https://denovo-db.gs.washington.edu/denovo-db/>) <sup>93</sup>. We also included one  
1069 additional epilepsy dataset <sup>94</sup> and two additional schizophrenia datasets <sup>95,96</sup> not included in the  
1070 `denovo-db` database. We defined “stop-gained”, “start-lost”, “stop-gained-near-splice”,  
1071 “frameshift”, “frameshift-near-splice”, “splice-donor”, and “splice-acceptor” mutations as protein-  
1072 truncating variants (PTVs) and “missense” and “missense-near-splice” mutations as missense  
1073 variants. The number of PTVs or missense variants for a gene in a disorder was defined as the  
1074 number of individuals with the disorder harboring PTVs or missense variants in the gene. The one-  
1075 sided Fisher's exact test was used to determine if there is a significant enrichment of *de novo*  
1076 variants in genes within individual PSD modules compared with those outside the module. The  
1077 resulting nominal p-values were adjusted using the Benjamini-Hochberg method. The summarized  
1078 results can be found in Supplementary Table 13c.

#### 1079 MAGMA analysis of PSD modules using GWAS data of human psychiatric disorders

1080 GWAS summary statistics for schizophrenia (June 2018 release), bipolar disorder (June 2018  
1081 release), autism spectrum disorder (November 2017 release), major depressive disorder  
1082 (mdd2019edinburgh), and attention-deficit/hyperactivity disorder (January 2022 release) were  
1083 downloaded from The Psychiatric Genomics Consortium database (<https://www.med.unc.edu/pgc/>)  
1084 <sup>97-100</sup>. MAGMA analysis was done in the same way as described above. The detailed results can  
1085 be found in Supplementary Table 13d.

#### 1086 Module enrichment of misexpressed genes after the onset of psychiatric disorders

1087 Gene expression data from brain samples in schizophrenia, bipolar disorder, autism spectrum  
1088 disorder, major depressive disorder, and controls were obtained from Gandal et al., 2018<sup>101</sup>. Genes  
1089 with an adjusted p-value less than 0.05 were considered misexpressed genes in a psychiatric  
1090 disorder. The summary can be found in Supplementary Table 13e. The one-sided hypergeometric  
1091 test was used to determine if there was a significant overlap with individual PSD modules. The  
1092 union of genes encoding PSD proteins and those expressed in the human neocortex was used as  
1093 the background. The resulting nominal p-values were adjusted using the Benjamini-Hochberg  
1094 method.

1095 **Code availability:** Code used for data analysis in this manuscript can be found at  
1096 [https://github.com/alexwang1001/PSD\\_development/](https://github.com/alexwang1001/PSD_development/).

1097 **Data and materials availability:** All raw proteomic data were deposited to ProteomeXchange  
1098 through MassIVE (human PFC dataset: MSV000091887, human V1 dataset: MSV000091888,  
1099 Macaque dataset: MSV000091889, Mouse dataset: MSV000091890). All processed data are  
1100 available in the auxiliary supplementary tables and at an online interactive portal  
1101 ([https://liwang.shinyapps.io/PSD\\_development\\_explorer/](https://liwang.shinyapps.io/PSD_development_explorer/)).

#### 1102 **Acknowledgments:**

1103 We thank NIH NeuroBioBank, the University of Maryland School of Medicine Brain and Tissue  
1104 Bank for providing post-mortem brain tissue samples. This work used the Vincent J.  
1105 Proteomics/Mass Spectrometry Laboratory at UC Berkeley, supported in part by NIH S10  
1106 Instrumentation Grant S10RR025622. We thank Lori Kohlstaedt for her help in mass spectrometry  
1107 data analysis. We thank Stephan Sanders, Roger Nicoll, Neelroop Parikshak, Tanzila Mukhtar,  
1108 Mengyi Song, and Huda Zoghbi for comments on the manuscript. This study was supported by  
1109 National Institute of Neurological Disorders and Stroke grant 5R35NS097305 to A.R.K., National  
1110 Human Genome Research Institute grant HG010898 to N.S., and National Institute of Mental  
1111 Health grant MH124619 to N.S..

#### 1112 **Author contributions:**

1113 Conceptualization: L.W.; data curation: L.W.; formal analysis: L.W.; funding acquisition: A.R.K.;  
1114 investigation: L.W., L.Z., A.C.-S., S.G.-G., S.W., M.W., B.H., T.L.; methodology: L.W., K.P.,  
1115 L.Z., A.C.-S., S.G.-G., Jiani Li, P.L., Jingjing Li, J.M.A.-G.; resources: S.W., Y.P., E.J.H., E.A.W.,  
1116 M.F.P., R.K., N.S., A.P.; software: L.W., K.P.; supervision: X.P., J.M.A.-G., A.A.-B., Z.L.,  
1117 A.R.K.; visualization: L.W., K.P.; writing – original draft: L.W.; writing – review & editing: all  
1118 authors.

1119 **Competing interests:** A.R.K. is a co-founder, consultant and director of Neurona Therapeutics.  
1120 The remaining authors declare no competing interests.

#### 1121 **Supplementary Materials**

1122 Supplementary Figure 1

1123 Supplementary Tables 1 to 13

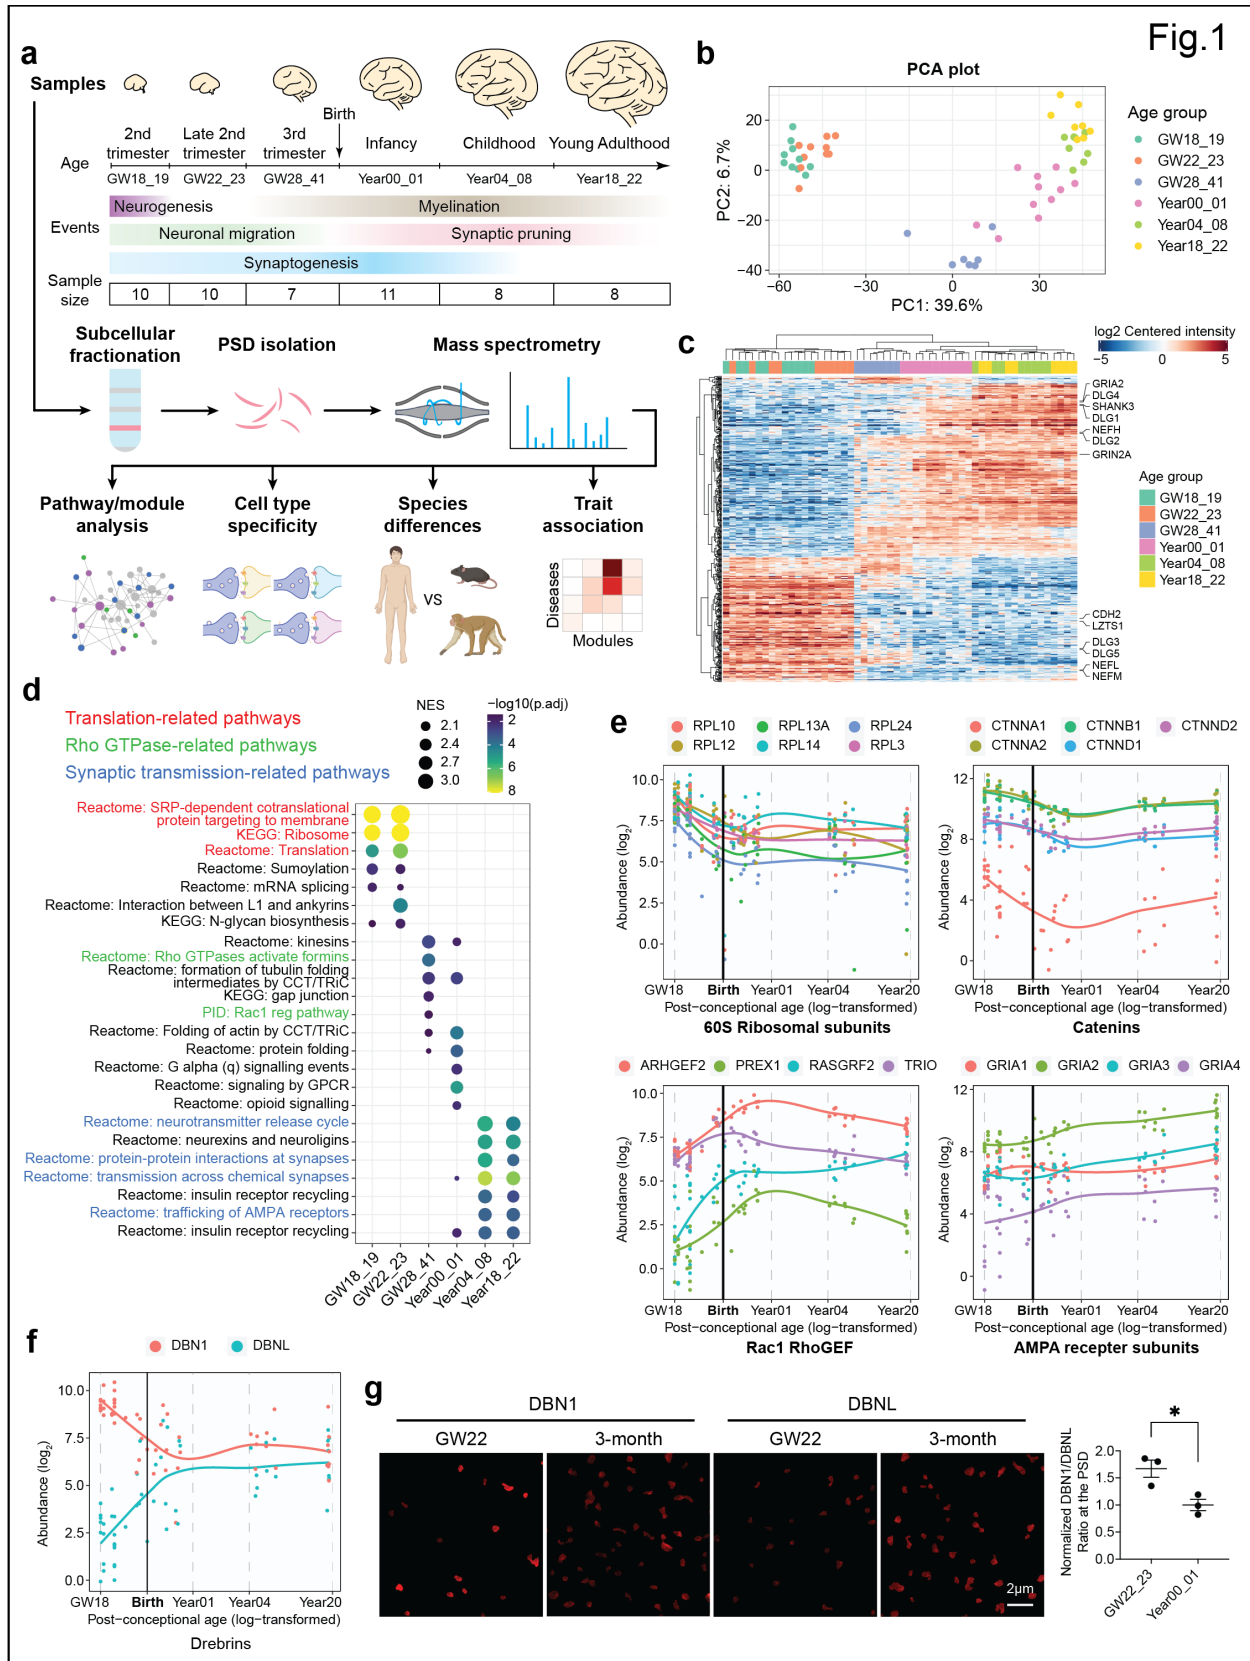

**Fig. 1 | Changes in PSD composition during human neocortical development.** **a**, Flow chart of the overall approach. **b**, PCA plots of the samples colored by their age groups. **c**, Hierarchical clustering of the samples based on proteins with differential abundance. **d**, Gene set enrichment analysis for individual age groups. NES: normalized enrichment score. **e**, Abundance patterns of representative PSD proteins. **f**, Abundance patterns of DBN1 and DBNL. **g**, Immunofluorescent intensity of DBN1 and DBNL at DLG4 loci in the human neocortex (n = 3, 3 samples, scale bar: 2  $\mu\text{m}$ ). \* $p < 0.05$ ; unpaired two-tailed  $t$  test.

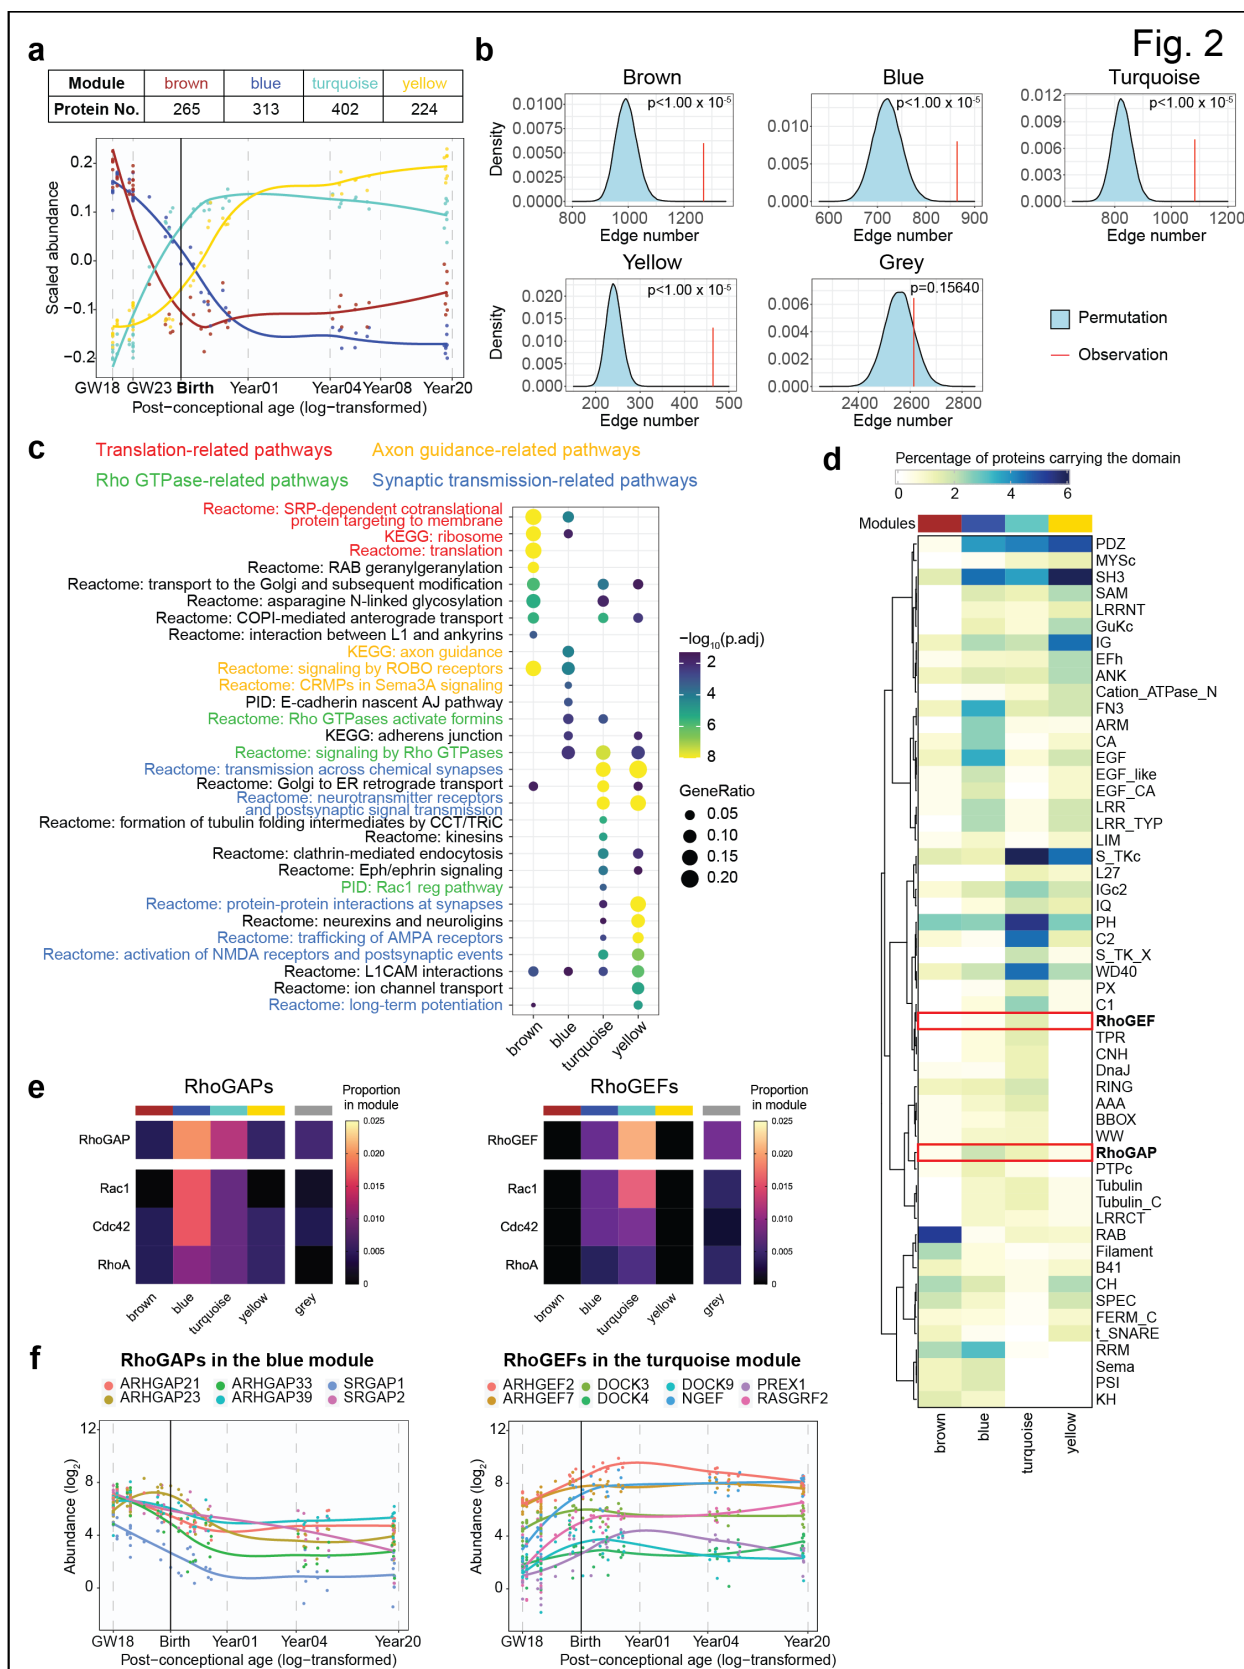

**Fig. 2 | Protein modules of the developing human PSD with distinct functions.** **a**, Scaled abundance patterns (module eigengene values) of four protein modules of the human PSD identified by WGCNA. **b**, Kernel density estimation of the null distributions of protein-protein interaction (PPI) numbers assuming no enrichment of PPI in individual modules; the vertical red lines indicate the observed PPI numbers in each module. **c**, Pathway enrichment analysis of each module (hypergeometric test). **d**, Distribution of protein domains in each module. **e**, Proportions of RhoGAPs and RhoGEFs and their subtypes in each module. **f**, Abundance patterns of RhoGAPs in the blue module and RhoGEFs in the turquoise module.

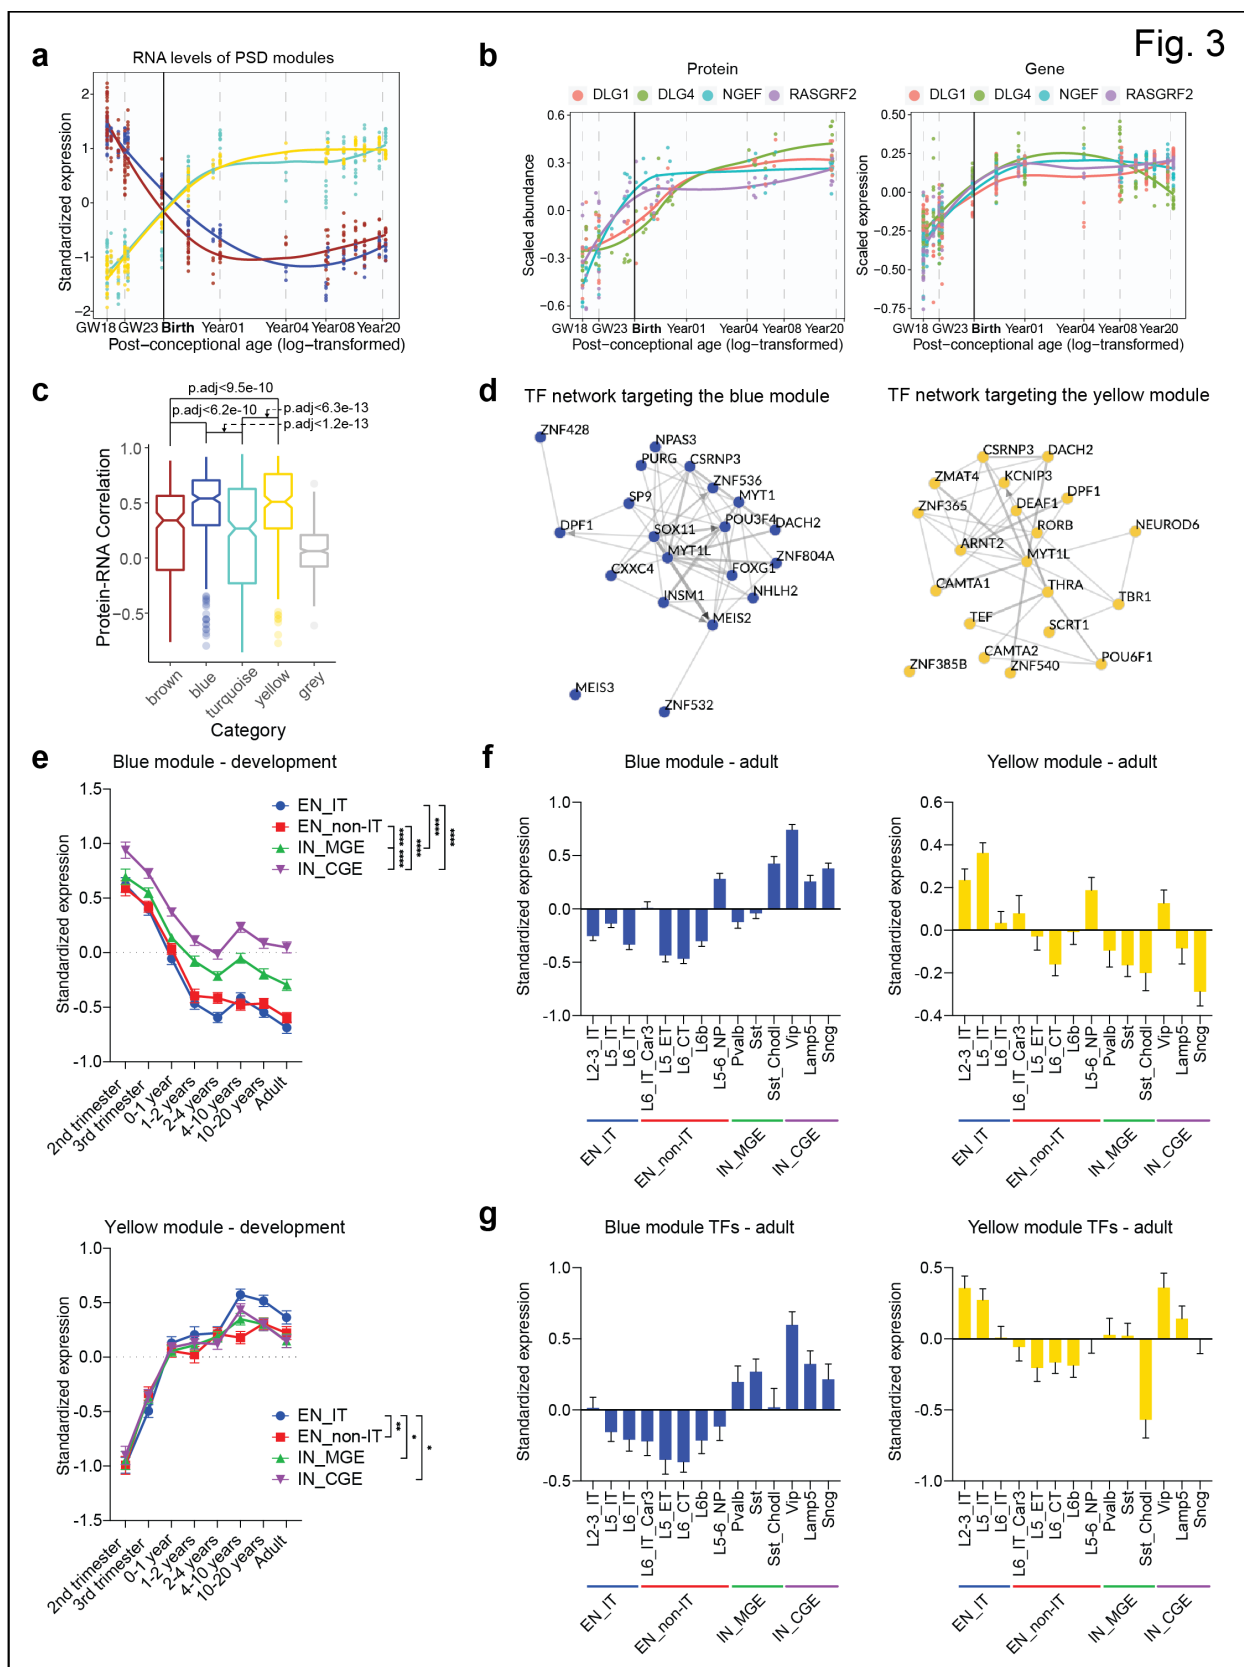

**Fig. 3 | Transcription of PSD proteins and cell type specificity.** **a**, Standardized median expression values of genes encoding proteins of the four PSD modules in the BrainSpan data. **b**, Scaled protein abundance and gene expression patterns of DLG1, DLG4, NGEF, and RASGRF2. **c**, Spearman correlation coefficients between protein abundance and gene expression of PSD proteins in each module. **d**, Transcription factor (TF) networks that regulate genes in the blue and yellow modules. **e**, Standardized expression values of genes in the blue and yellow modules in individual neuronal subtypes of the developing human neocortex. EN\_IT: excitatory intratelencephalic neuron; EN\_non-IT: excitatory non-intratelencephalic neuron; IN\_MGE: inhibitory neuron derived from the medial ganglionic eminence; IN\_CGE: inhibitory neuron derived from the caudal ganglionic eminence. **f**, Standardized expression values of genes in the blue and yellow modules in individual neuronal subtypes of the adult human neocortex. **g**, Standardized expression values of TFs predicted to regulate the blue and yellow modules in individual neuronal subtypes of the adult human neocortex.



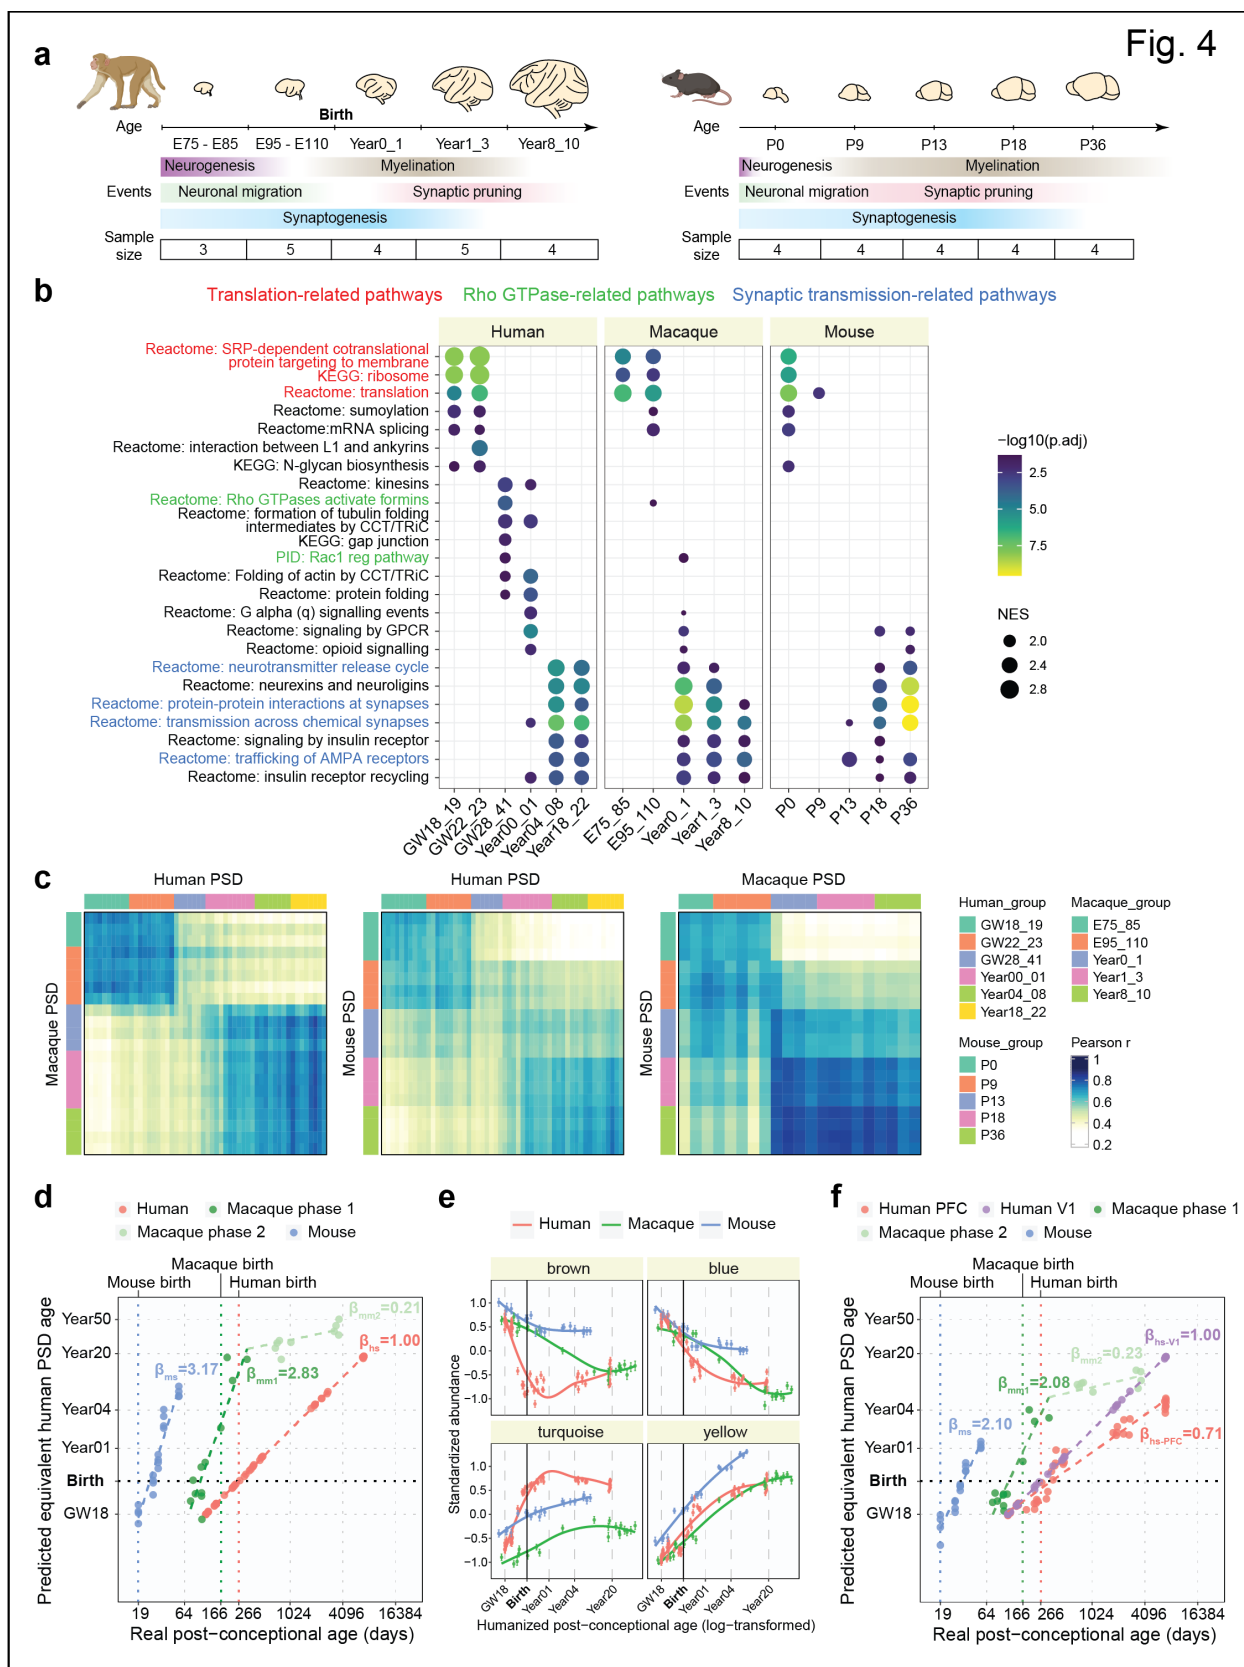

**Fig. 4 | Comparison of PSD development across humans, macaques, and mice.** **a**, Schematic illustrating the developmental stages of macaque and mouse samples. **b**, Gene set enrichment analysis for individual age groups across species. NES: normalized enrichment score. **c**, Similarity matrices representing pairwise Pearson correlations between human, macaque, and mouse samples. **d**, Predicted equivalent human PSD ages.  $\beta$  indicates the slope coefficients of the linear regression models in each species. **e**, Standardized abundance patterns of proteins in the four PSD modules across species. **f**, Predicted equivalent human PSD ages based on the human V1 dataset.  $\beta$  indicates the slope coefficients of the linear regression models in each region and species.

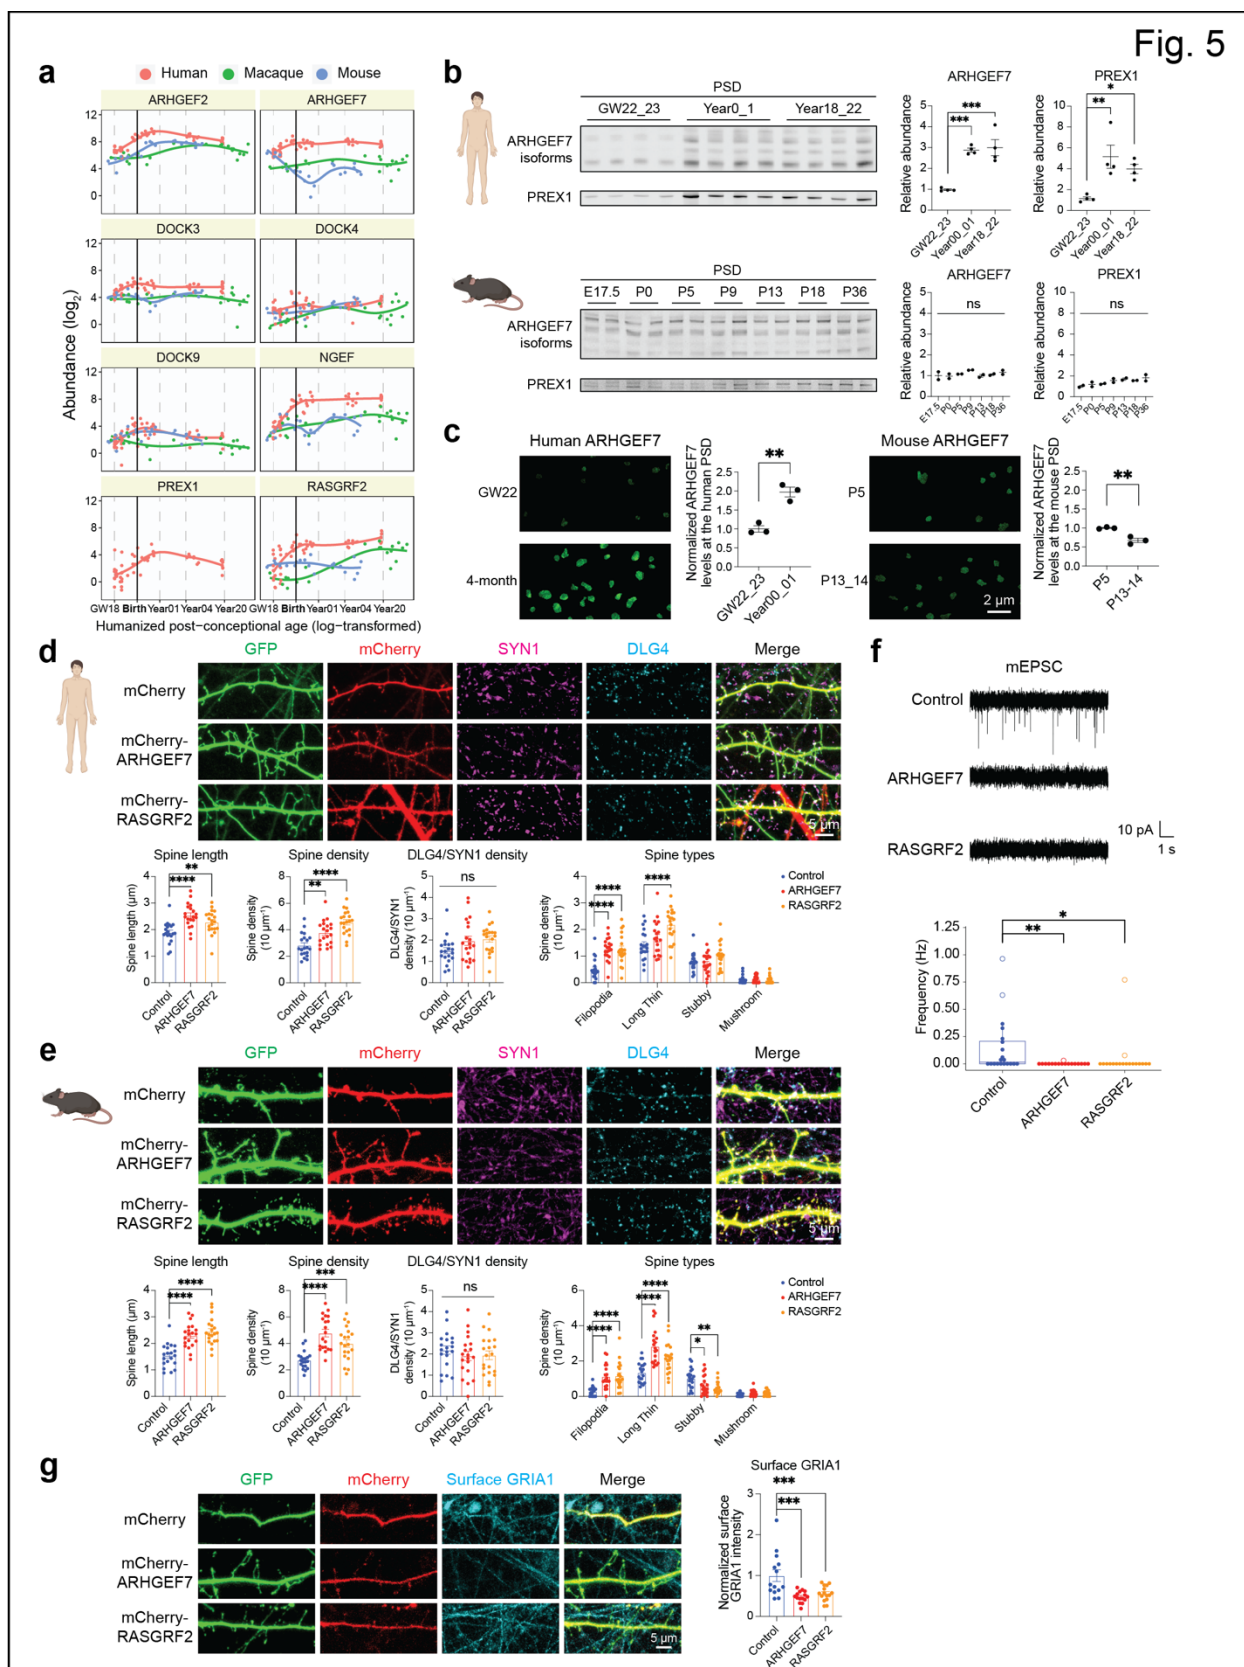

**Fig. 5 | Increase in RhoGEF proteins promotes neoteny of human synapses.** **a**, Abundance patterns of RhoGEFs in the turquoise module across species. **b**, Immunoblots and quantification of representative RhoGEFs in the PSD of the developing human (n = 4, 4, 4 samples) and mouse (n = 2, 2, 2, 2, 2, 2, 2 samples) PSD. \*p < 0.05, \*\*p < 0.01, \*\*\*p < 0.001; one-way ANOVA with Holm-Sidak's multiple comparisons test. **c**, Immunofluorescent intensity of ARHGEF7 at DLG4 loci in the developing human and mouse neocortex (n = 3, 3, 3, 3 samples, scale bar: 2  $\mu$ m). \*\*p < 0.01; unpaired two-tailed *t* test. **d**, Immunostaining of dendrites from primary human cortical neurons cultured six weeks *in vitro* transfected with mEGFP-C1 and vectors expressing mCherry, mCherry-ARHGEF7, or mCherry-RASGRF2 (n = 20, 20, 20 neurons, scale bar: 5  $\mu$ m). \*\*p < 0.01, \*\*\*\*p < 0.0001; one-way ANOVA with Holm-Sidak's multiple comparisons test. **e**, Immunostaining of dendrites from primary mouse cortical neurons cultured 8 days *in vitro* transfected with mEGFP-C1 and vectors expressing mCherry, mCherry-ARHGEF7, or mCherry-RASGRF2 (n = 20, 20, 20 neurons, scale bar: 5  $\mu$ m). \*p < 0.05, \*\*p < 0.01, \*\*\*p < 0.001, \*\*\*\*p < 0.0001; one-way ANOVA with Holm-Sidak's multiple comparisons test. **f**, Miniature excitatory postsynaptic current (mEPSC) recording of primary human cortical neurons cultured six weeks *in vitro* transfected with mEGFP-C1 and vectors expressing mCherry, mCherry-ARHGEF7, or mCherry-RASGRF2 (n = 20, 17, 18 neurons). \*p < 0.05, \*\*p.adj < 0.01; Kruskal–Wallis test with Dunn's multiple comparisons test. **g**, Immunostaining against surface GRIA1 of dendrites from primary human cortical neurons cultured six weeks *in vitro* transfected with mEGFP-C1 and vectors expressing mCherry, mCherry-ARHGEF7, or mCherry-RASGRF2 (n = 14, 15, 15 neurons, scale bar: 5  $\mu$ m). \*\*\*p < 0.001; one-way ANOVA with Holm-Sidak's multiple comparisons test.

Fig. 6

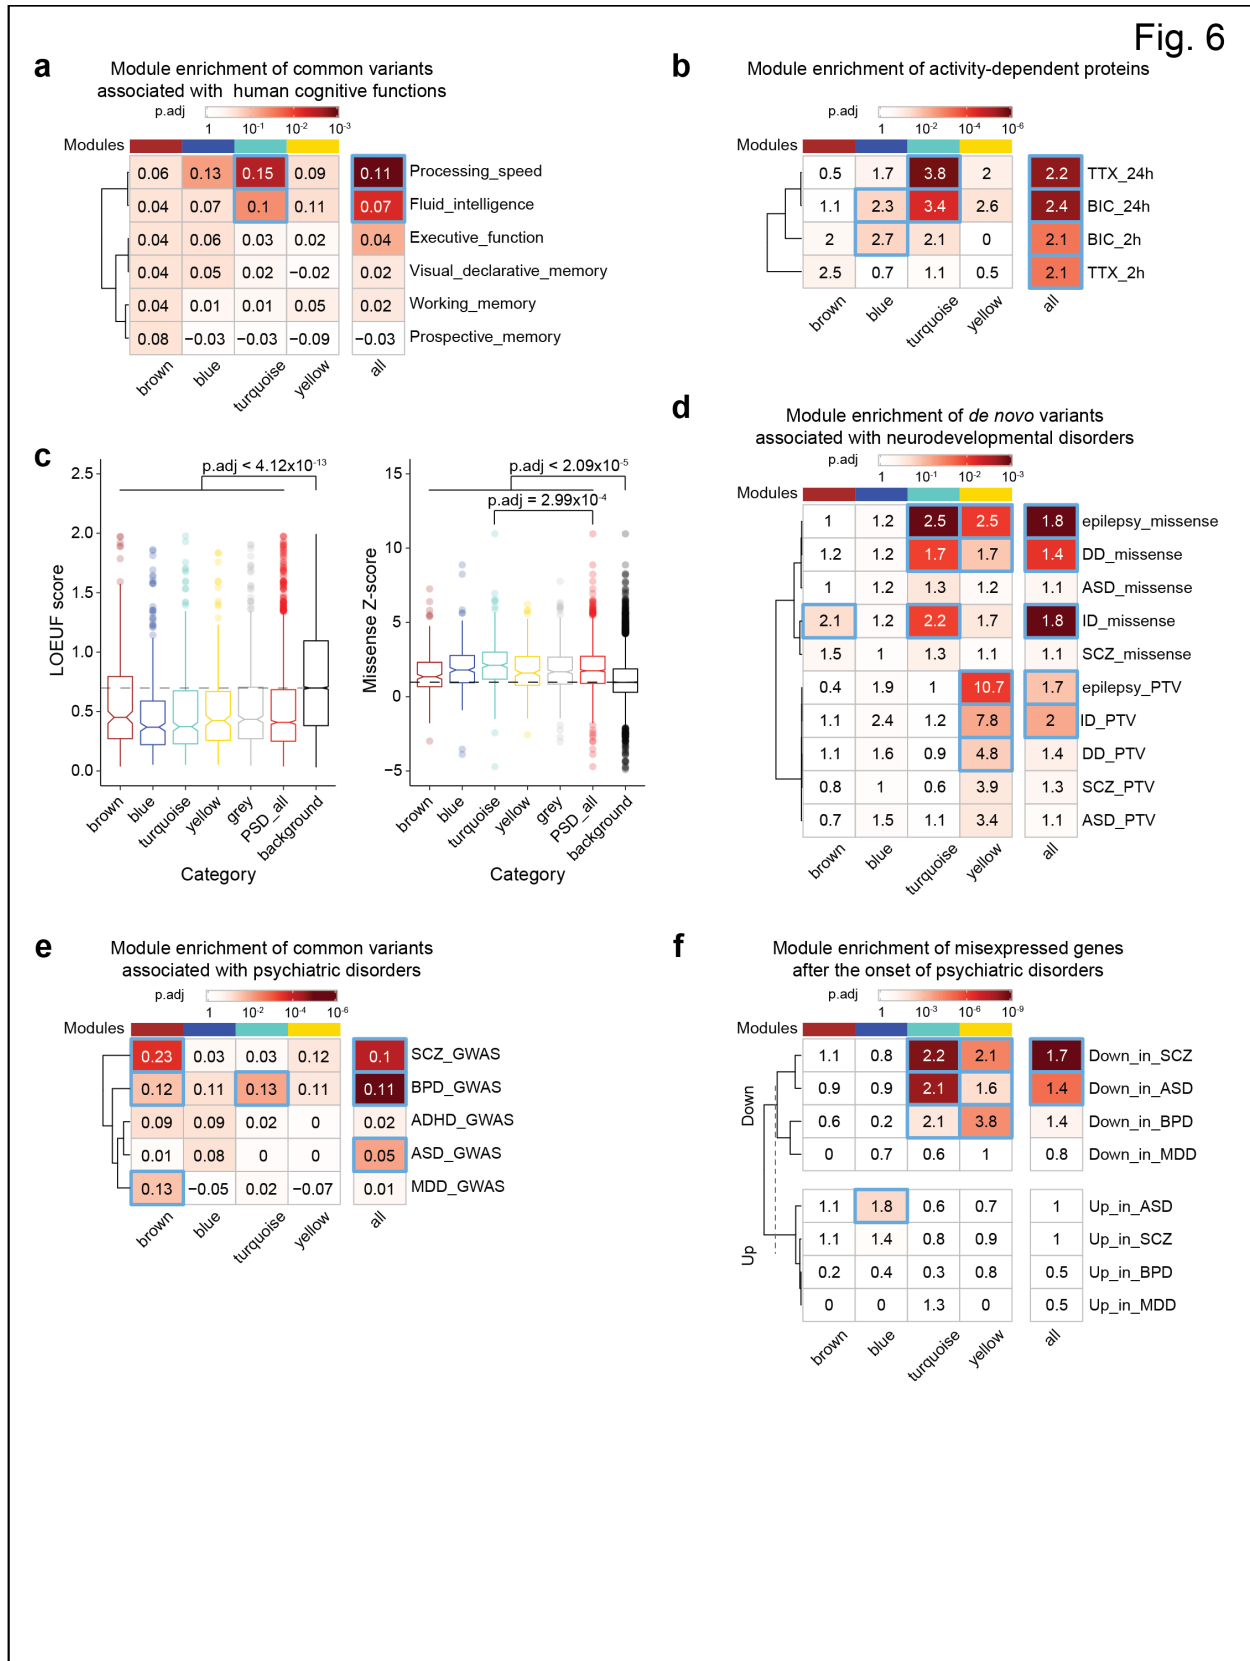

**Fig. 6 | Association of human PSD modules with cognitive functions and brain disorders. a,** Enrichment of common variants associated with human cognitive functions in PSD modules. The numbers indicate the MAGMA linear regression coefficient  $\beta$ . The blue borders denote  $p_{\text{adj}} < 0.05$ ; MAGMA analysis on GWAS summary statistics. **b,** Enrichment of neuronal activity-dependent proteins in PSD modules. The numbers indicate the odds ratio. The blue borders denote  $p_{\text{adj}} < 0.05$ ; hypergeometric test. **c,** Distribution of gnomAD LOEUF scores and missense Z-scores of genes in each category. Kruskal–Wallis test. **d,** Enrichment of de novo variants associated with neurodevelopmental disorders in PSD modules. The numbers indicate the odds ratio. The blue borders denote  $p_{\text{adj}} < 0.05$ ; hypergeometric test. **e,** Enrichment of common variants associated with psychiatric disorders in PSD modules. The numbers indicate the MAGMA linear regression coefficient  $\beta$ . The blue borders denote  $p_{\text{adj}} < 0.05$ ; MAGMA analysis on GWAS summary statistics. **f,** Enrichment of misexpressed genes after the onset of psychiatric disorders in PSD modules. The numbers indicate the odds ratio. The blue borders denote  $p_{\text{adj}} < 0.05$ ; hypergeometric test.

## Extended Data Fig. 1

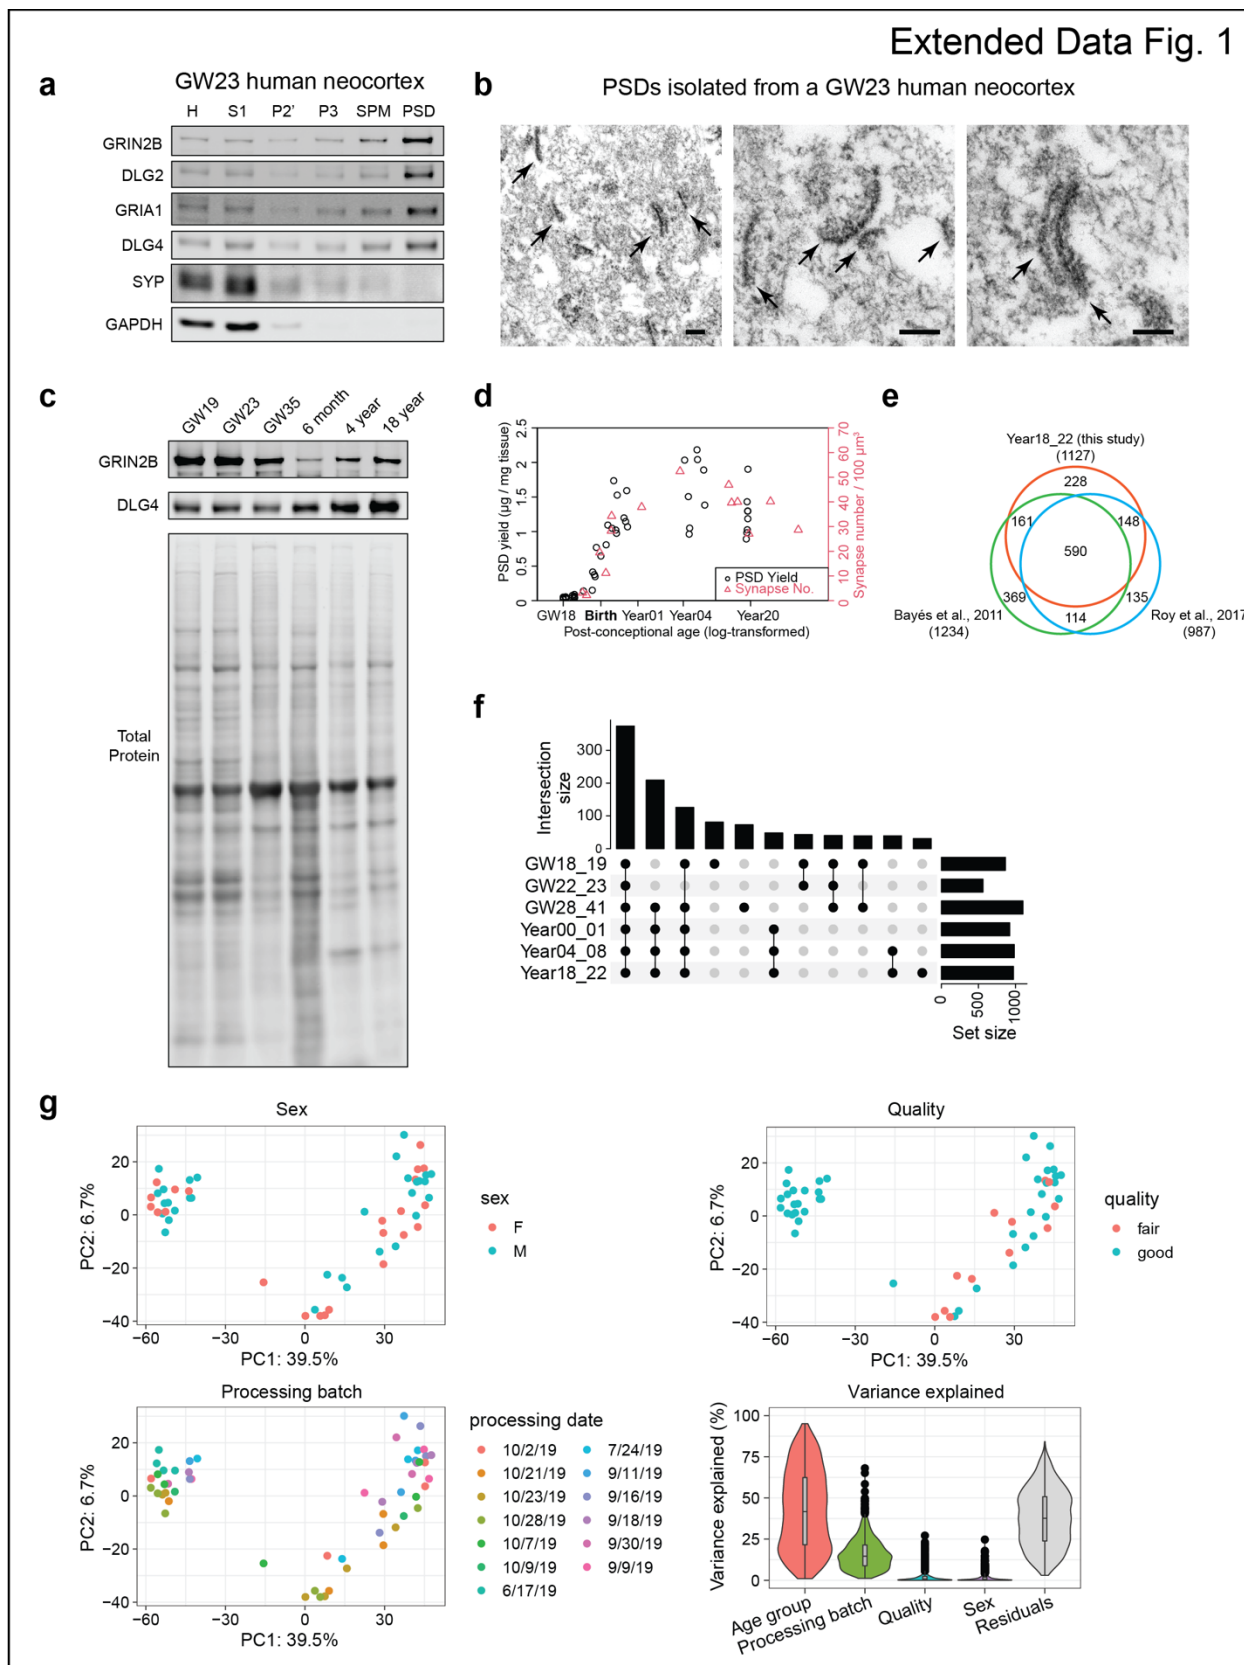

**Extended Data Fig. 1 | Isolation of PSD from immature and mature human cortices. a,** Western blot analysis of different subcellular fractions of a GW23 sample demonstrating enrichment of PSD proteins and depletion of presynaptic SYP and cytoplasmic GAPDH in the PSD fraction. **b,** Electron micrographs of the PSD fraction isolated from a GW23 sample (scale bar: 200 nm). Arrows denote structures resembling the PSD. **c,** Western blot analysis of purified PSDs from different age groups demonstrating changes in GRIN2B and DLG4 during development. **d,** Correlation between PSD yield and synapse number of the human prefrontal cortex. **e,** Venn diagram showing the overlap between Year18\_22 samples in this study and the human PSD proteomes published in Roy et al., 2017 and Bayés et al., 2011. **f,** UpSet plot describing the number of identified proteins and their overlaps at each age group. **g,** PCA plots of the samples colored by various covariates and variance explained by individual covariates.



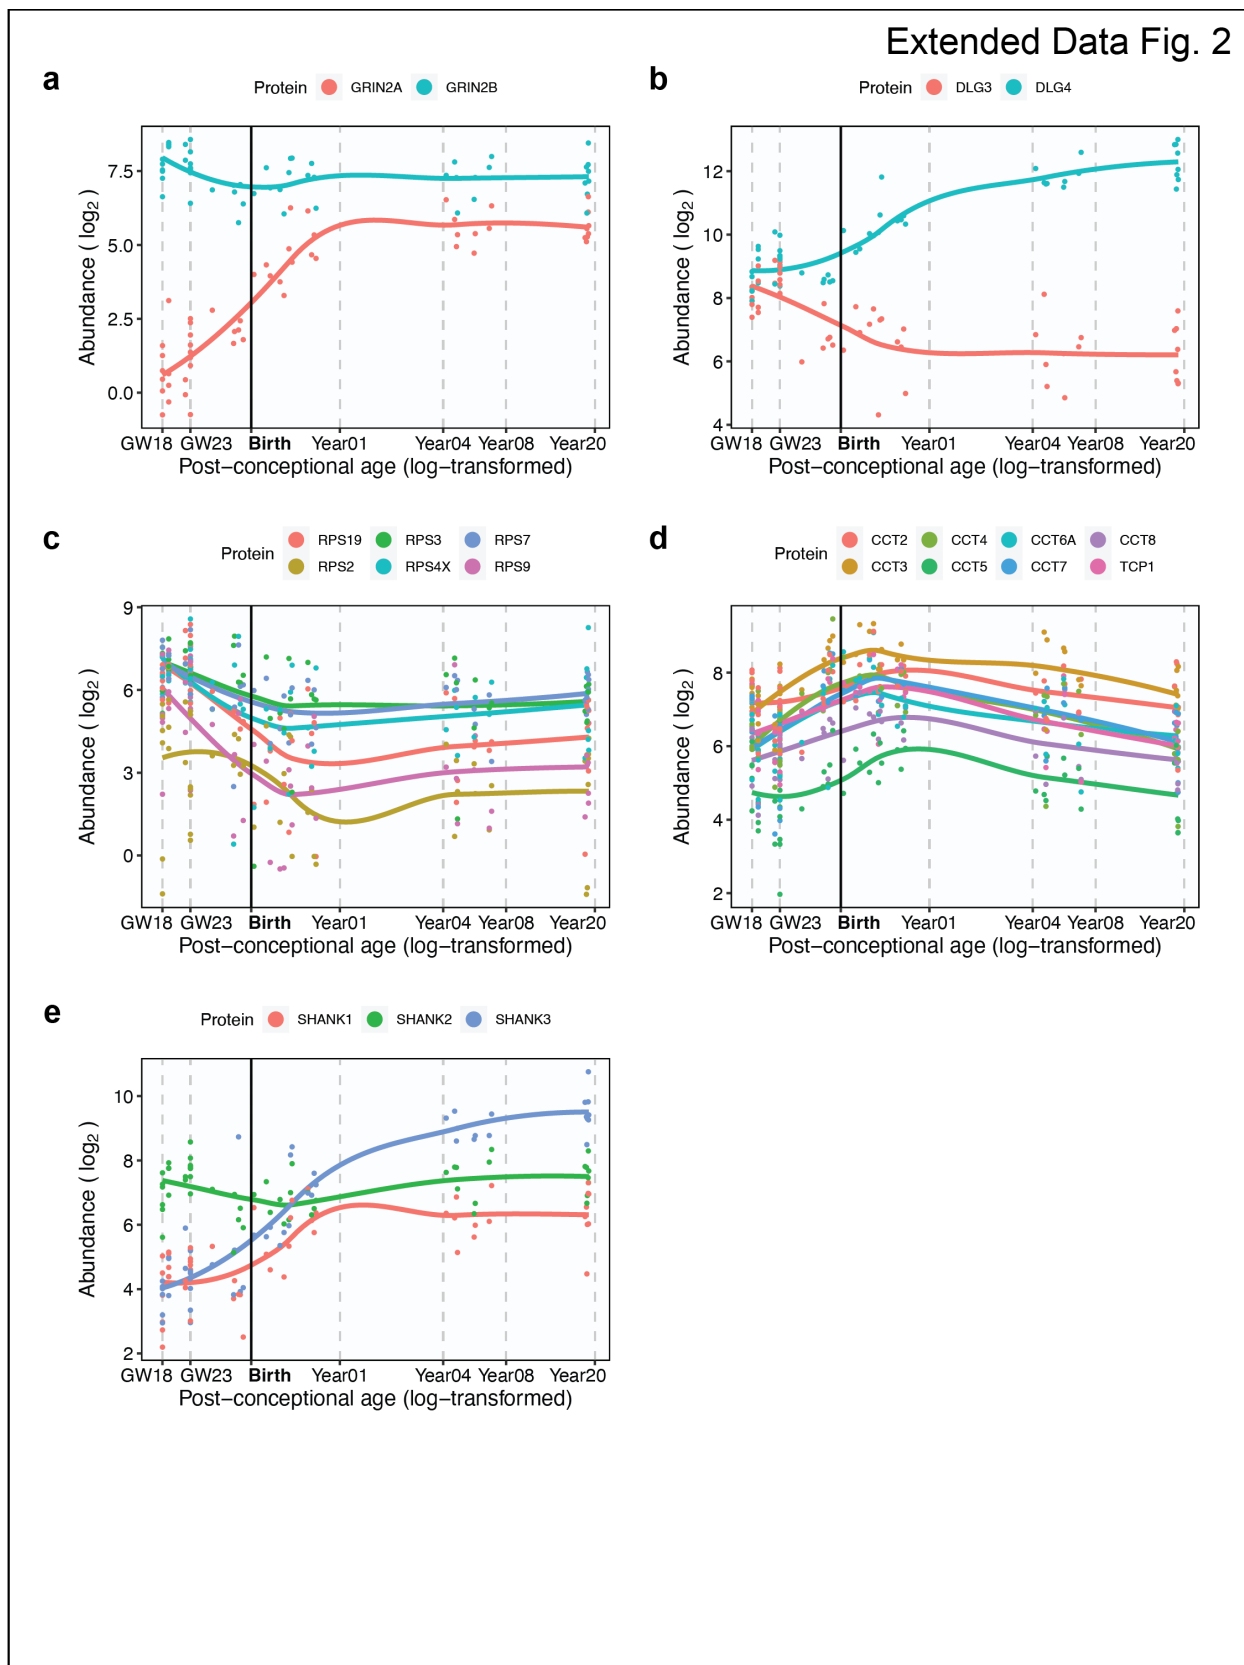

**Extended Data Fig. 2 | Examples of PSD protein abundance patterns in human cortical development. a,** Abundance patterns of GRIN2A and GRIN2B. **b,** Abundance patterns of DLG3 and DLG4. **c,** Abundance patterns of the 40S ribosomal subunits. **d,** Abundance patterns of the TRiC subunits. **e,** Abundance patterns of SHANK family scaffolding proteins.

### Extended Data Fig. 3

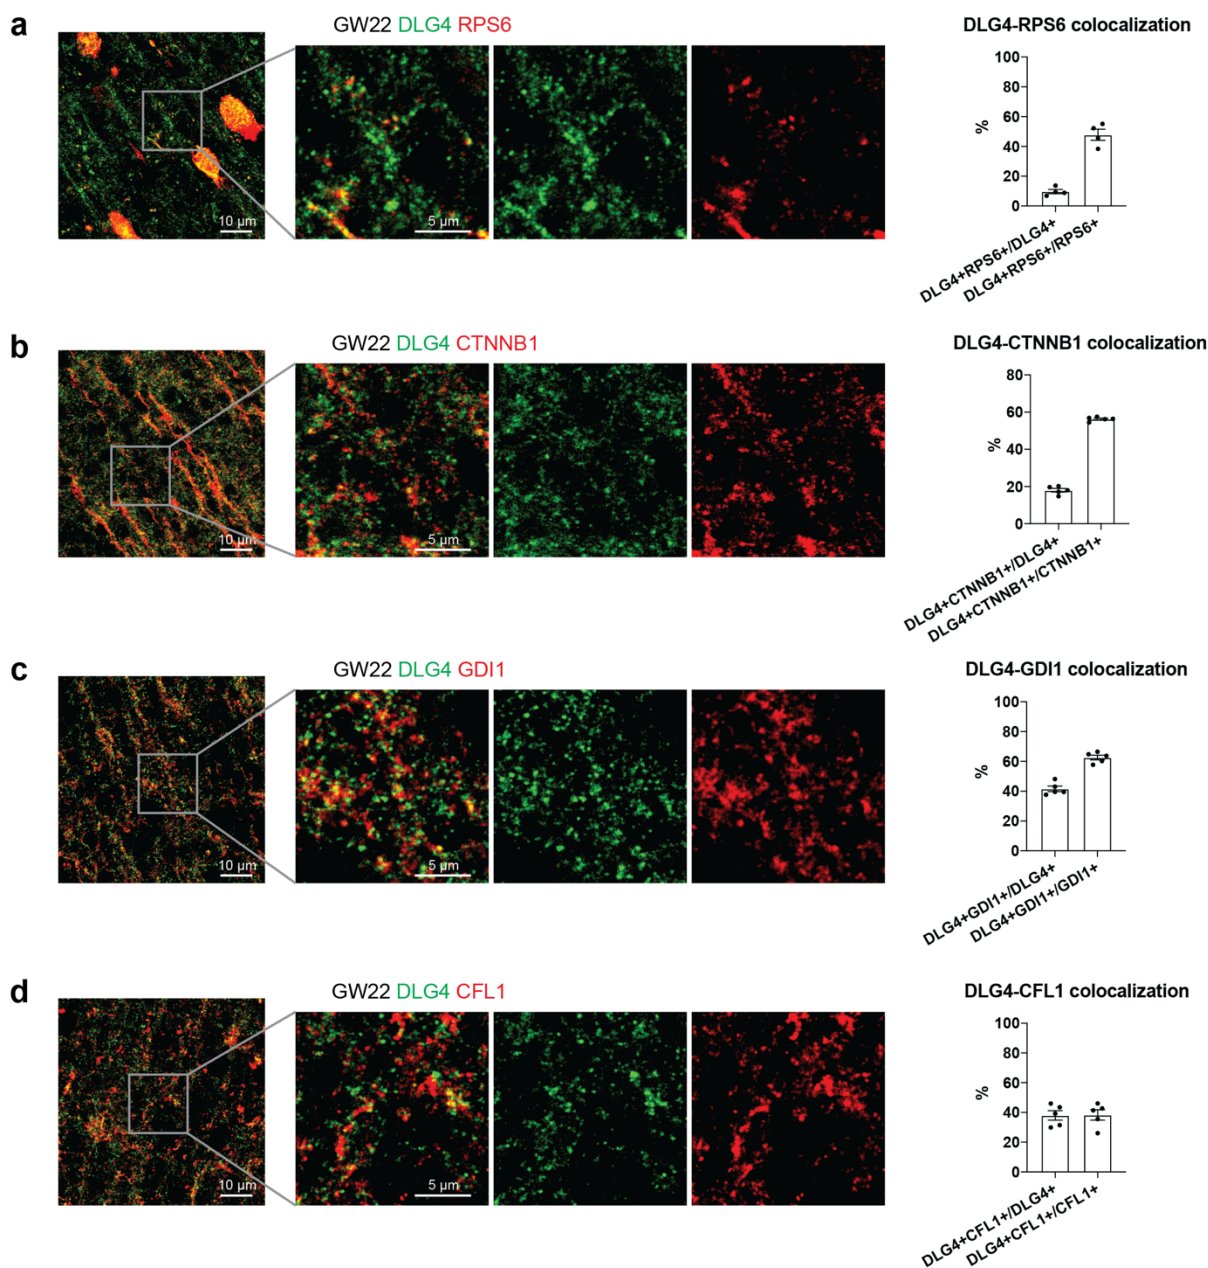

**Extended Data Fig. 3 | Colocalization of early PSD proteins with DLG4 in immature human neocortex. a–d**, Colocalization of RPS6 (a), CTNNB1 (b), GDI1 (c), or CFL1 (d) with DLG4 in GW22 human neocortex (scale bar: 10  $\mu\text{m}$  or 5  $\mu\text{m}$  as indicated in the figure).

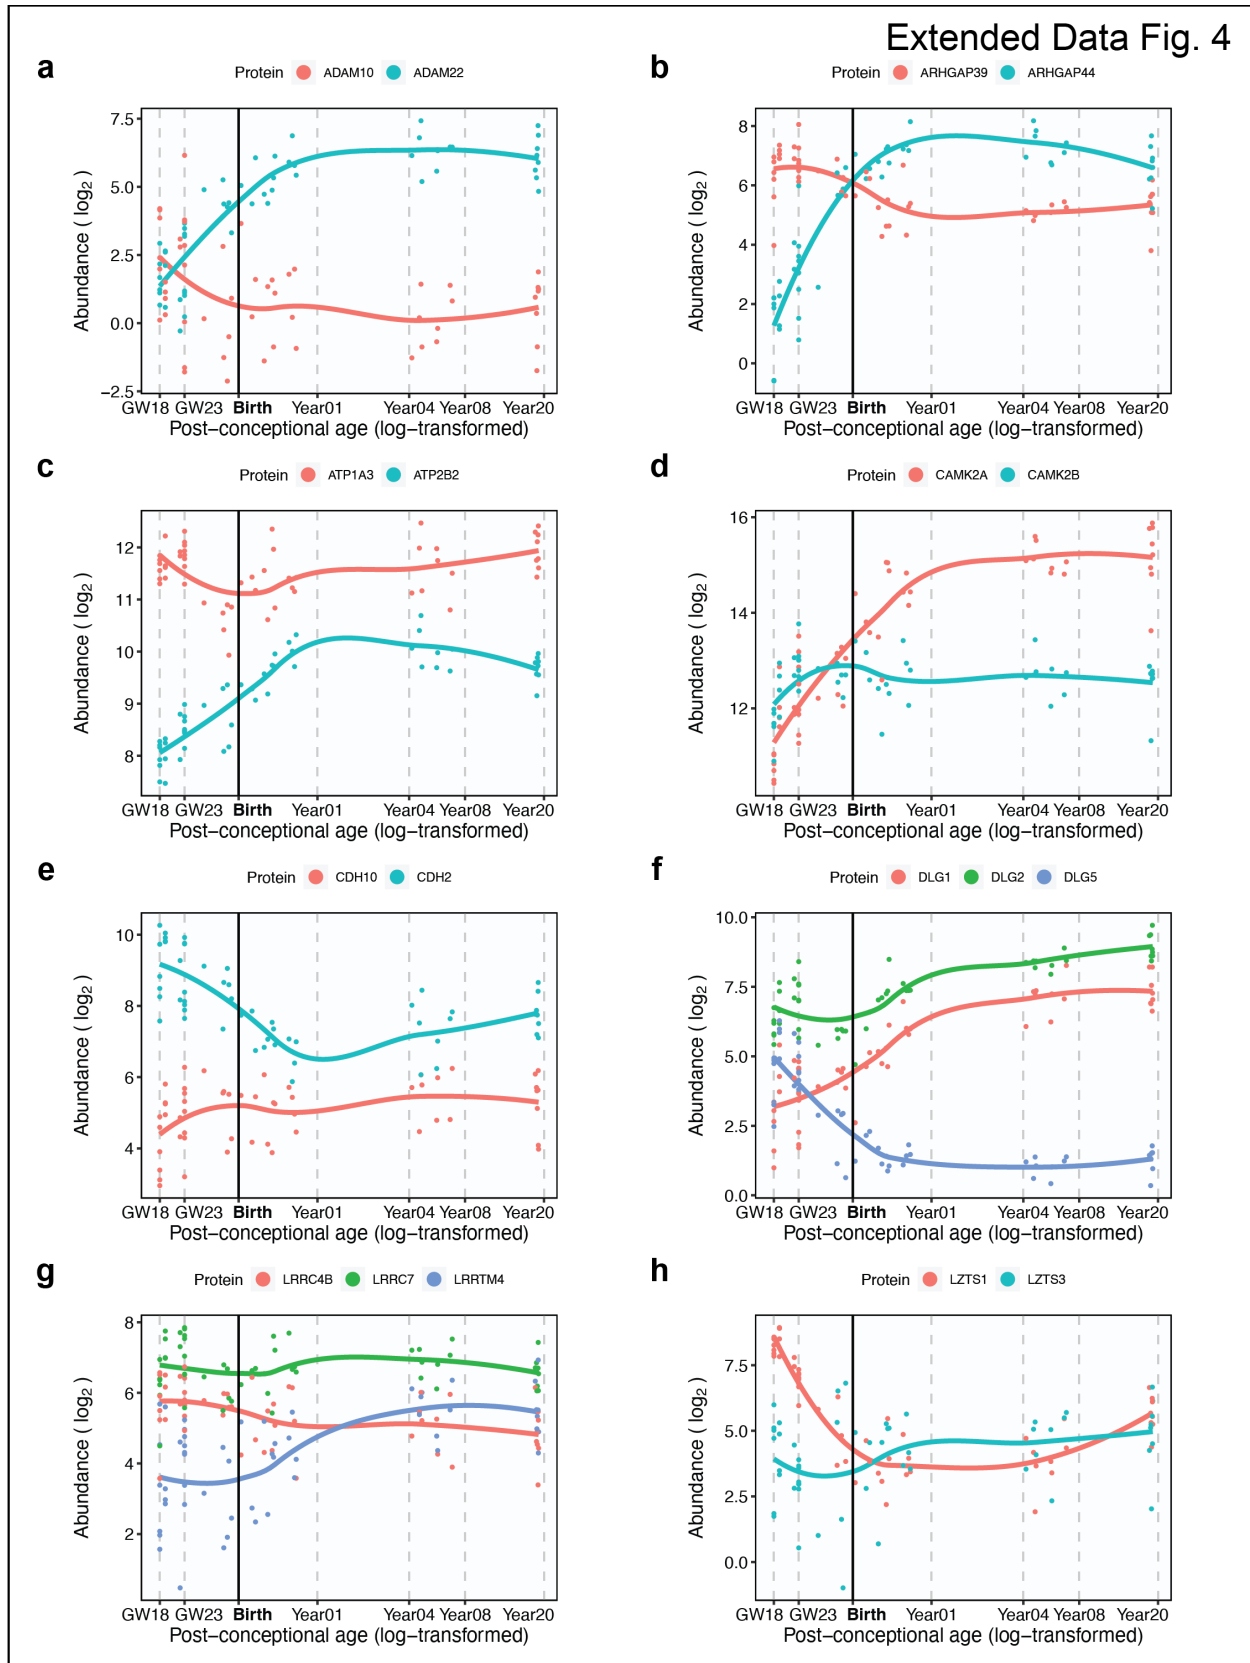

**Extended Data Fig. 4 | PSD protein paralogs subjected to reciprocal developmental changes. a–h** Examples of PSD protein paralogs identified in this study that undergo reciprocal developmental changes.

Extended Data Fig. 5

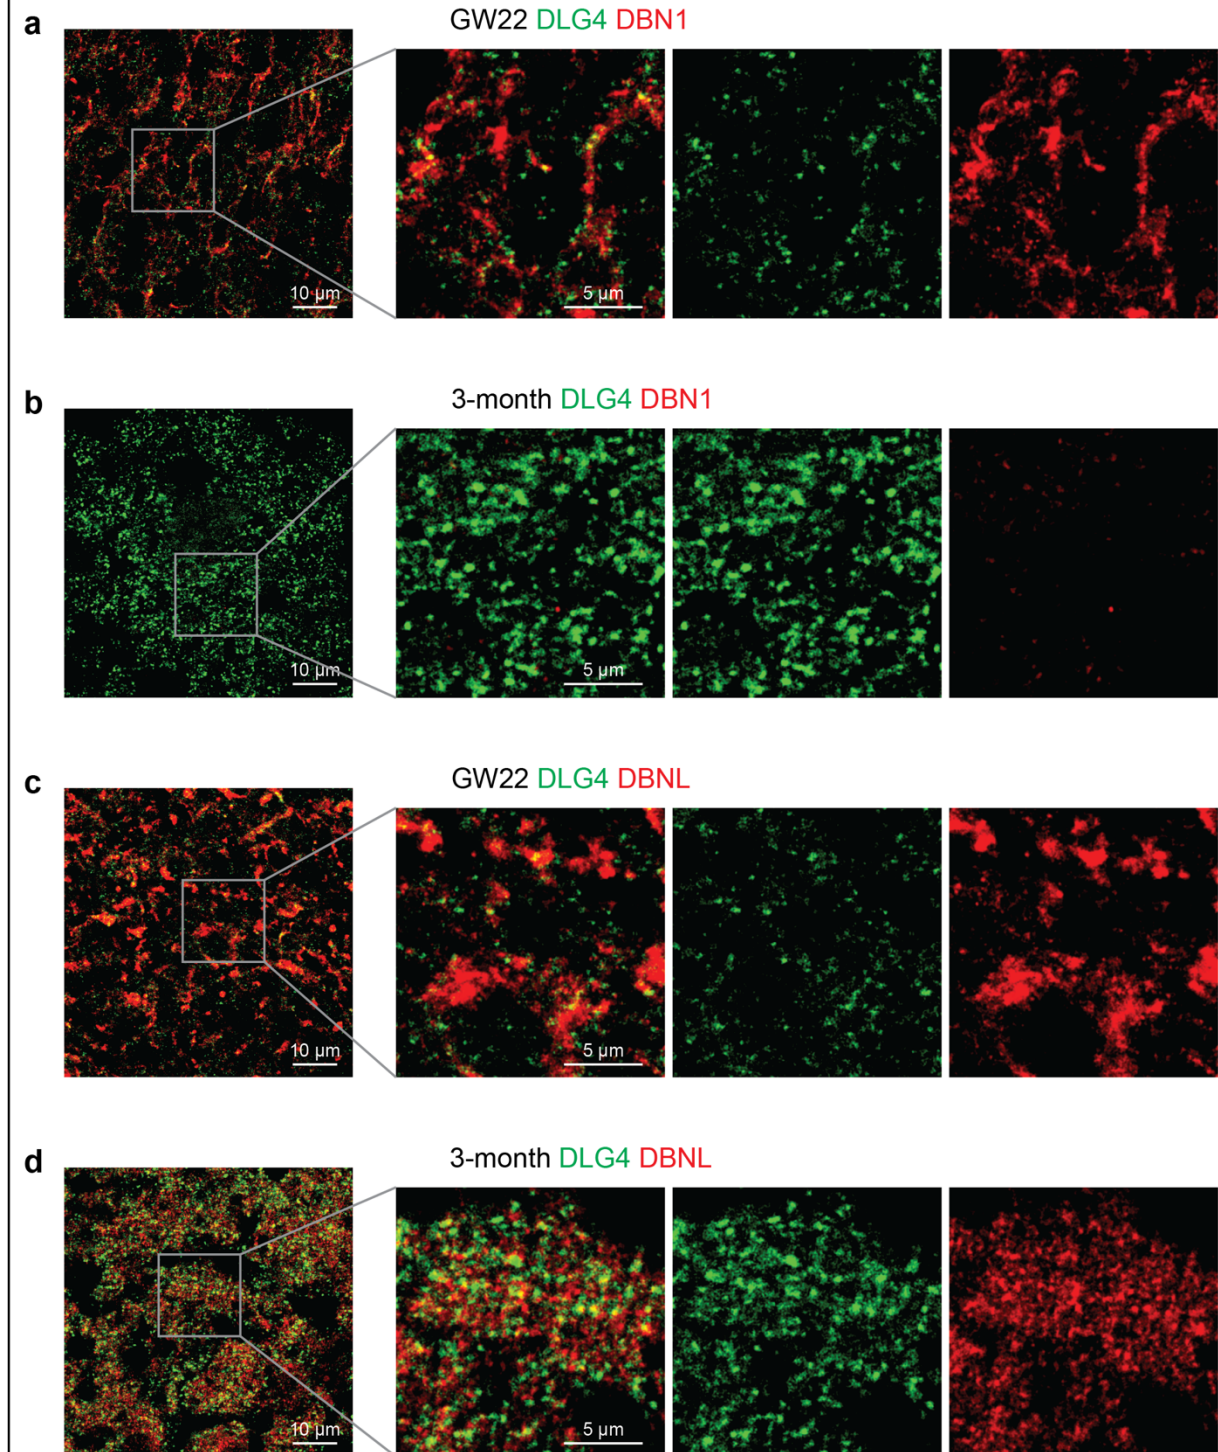

**Extended Data Fig. 5 | Quantification of DBN1 and DBNL in the PSD of the human neocortex. a–d**, Colocalization of DBN1 (**a** and **b**) and DBNL (**c** and **d**) with DLG4 in the GW22 (**a** and **c**) and 4-month (**b** and **d**) human neocortex (scale bar: 10  $\mu\text{m}$  or 5  $\mu\text{m}$  as indicated in the figure).



## Extended Data Fig. 6

**a**

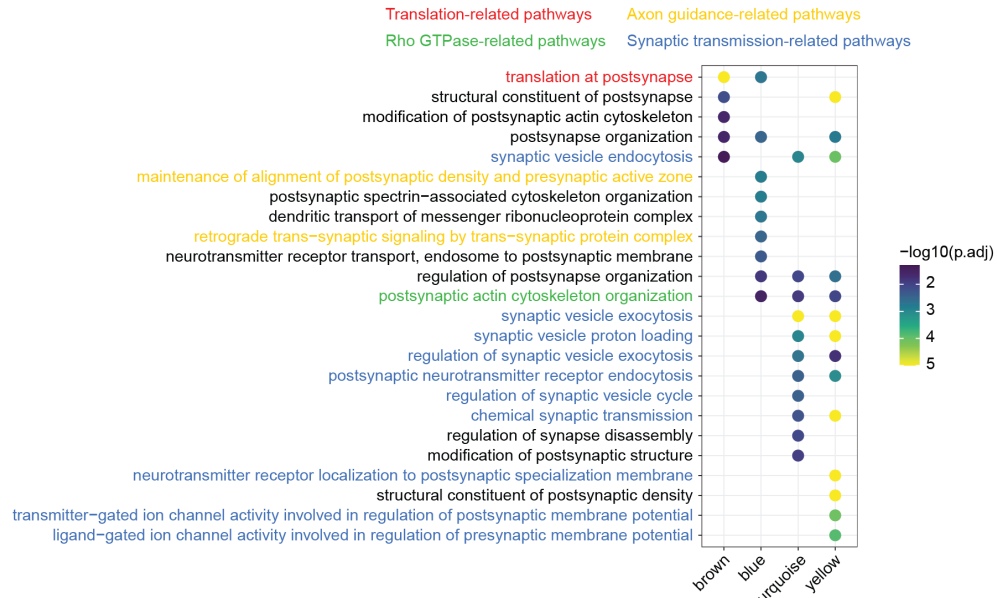

**b**

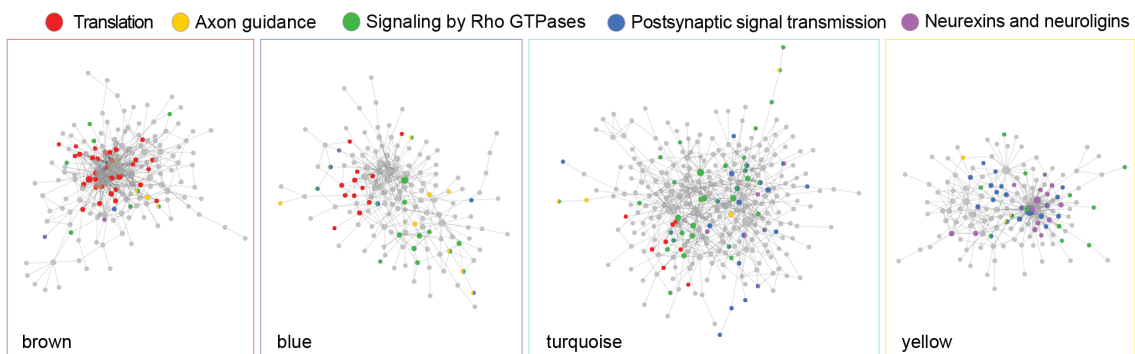

**c**

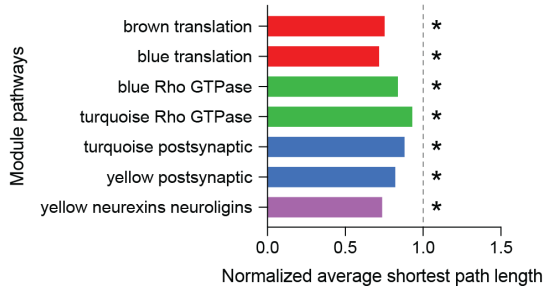

**Extended Data Fig. 6 | Pathway enrichment in individual PSD modules.** **a**, SynGO biological pathway enrichment analysis of each module. **b**, PPI-co-abundance network of each module highlighting proteins in enriched pathways. **c**, The normalized average shortest path lengths of pathways in individual modules. The asterisks denote that the average shortest path length is significantly shorter within pathway proteins than between pathway and non-pathway proteins. \* $p < 0.01$ ; Wilcoxon rank sum test.

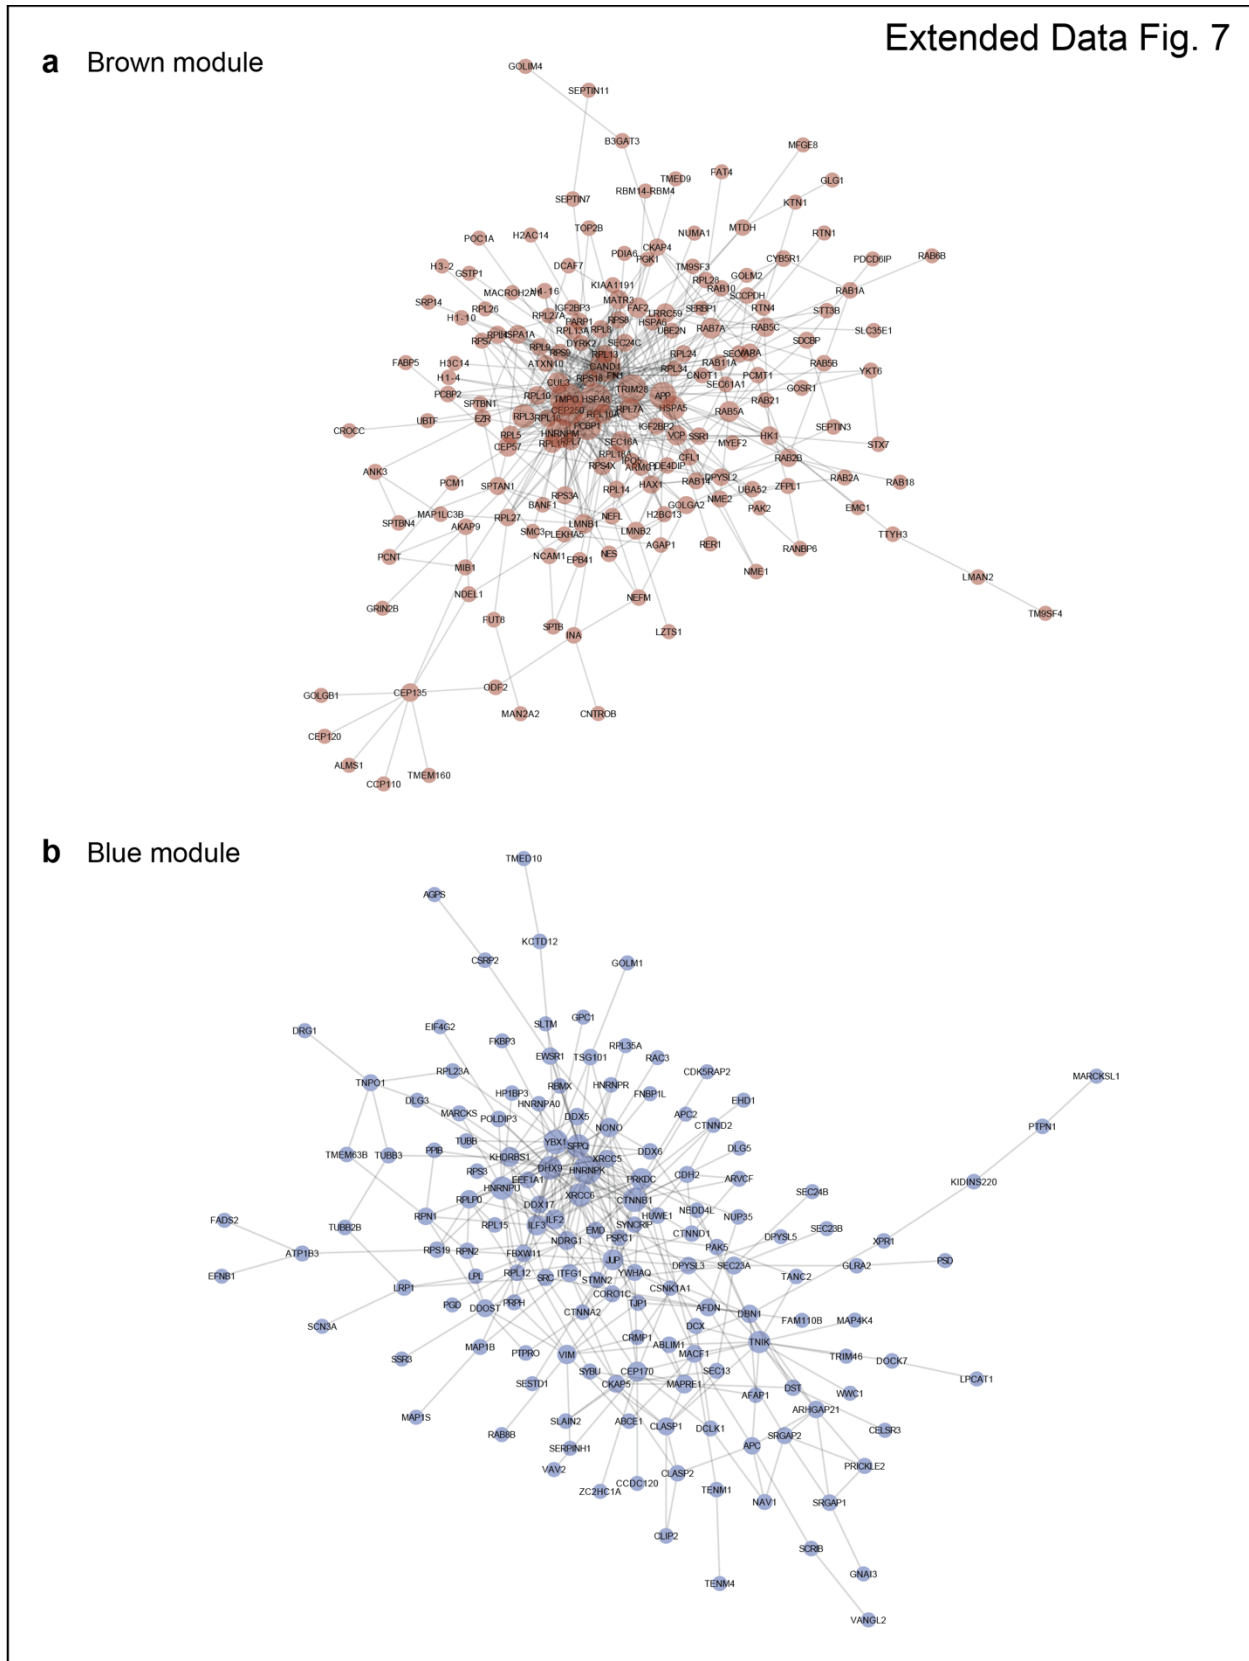

**Extended Data Fig. 7 | PPI-co-abundance network of the brown (a) and the blue (b) modules.**

## Extended Data Fig. 8

### a Turquoise module

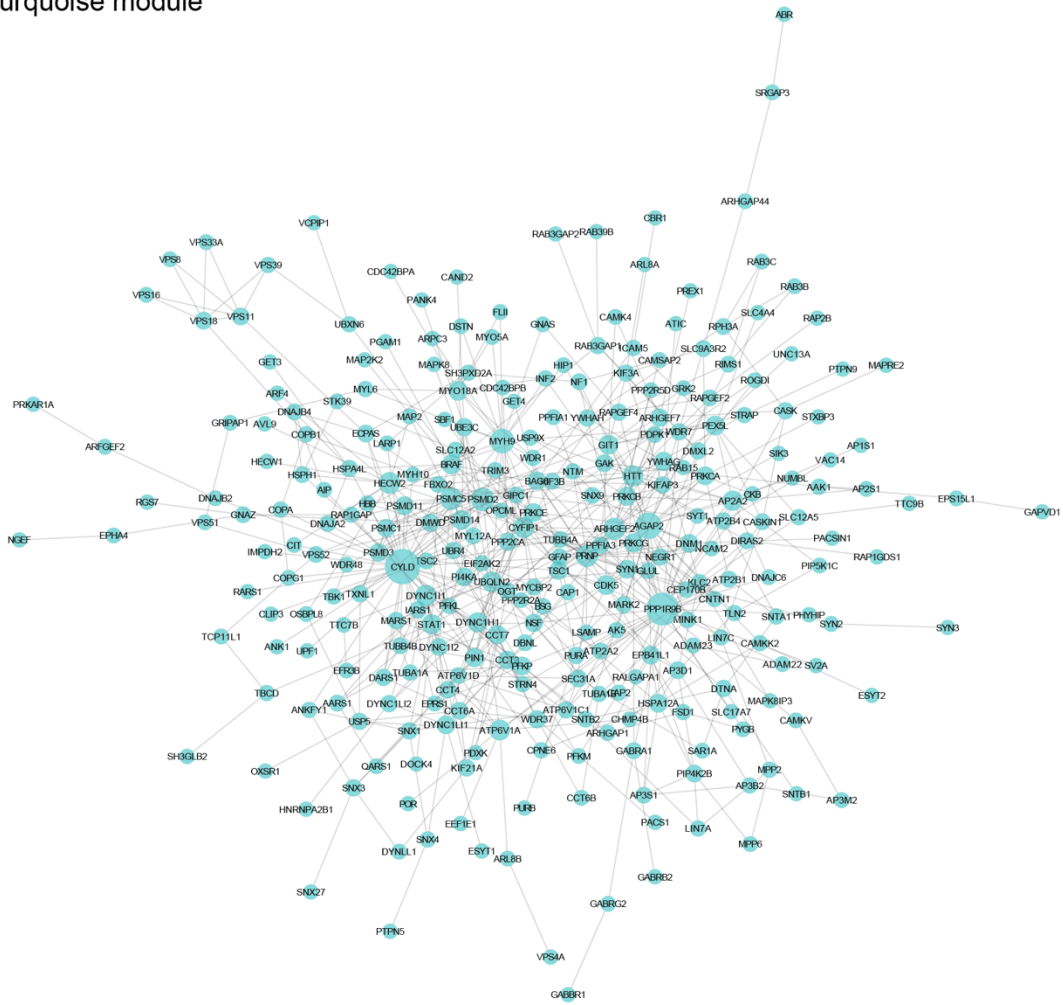

### b Yellow module

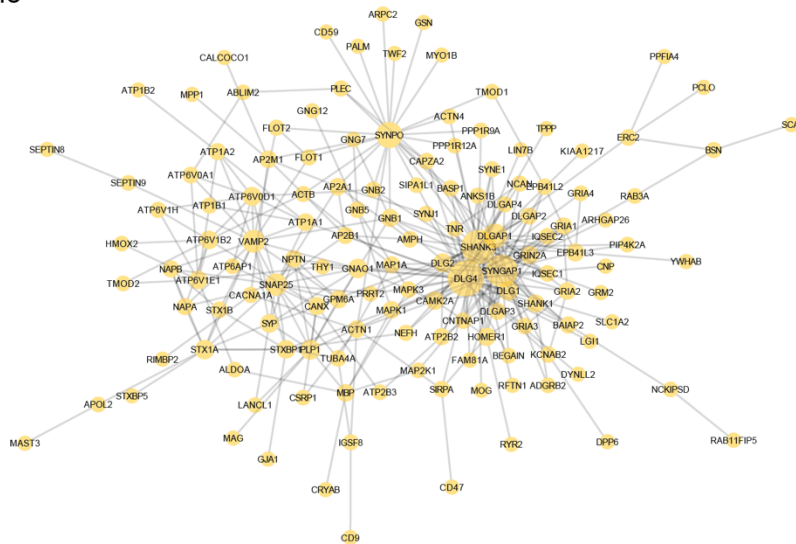

**Extended Data Fig. 8 | PPI-co-abundance network of the turquoise (a) and the yellow (b) modules.**

## Extended Data Fig. 9

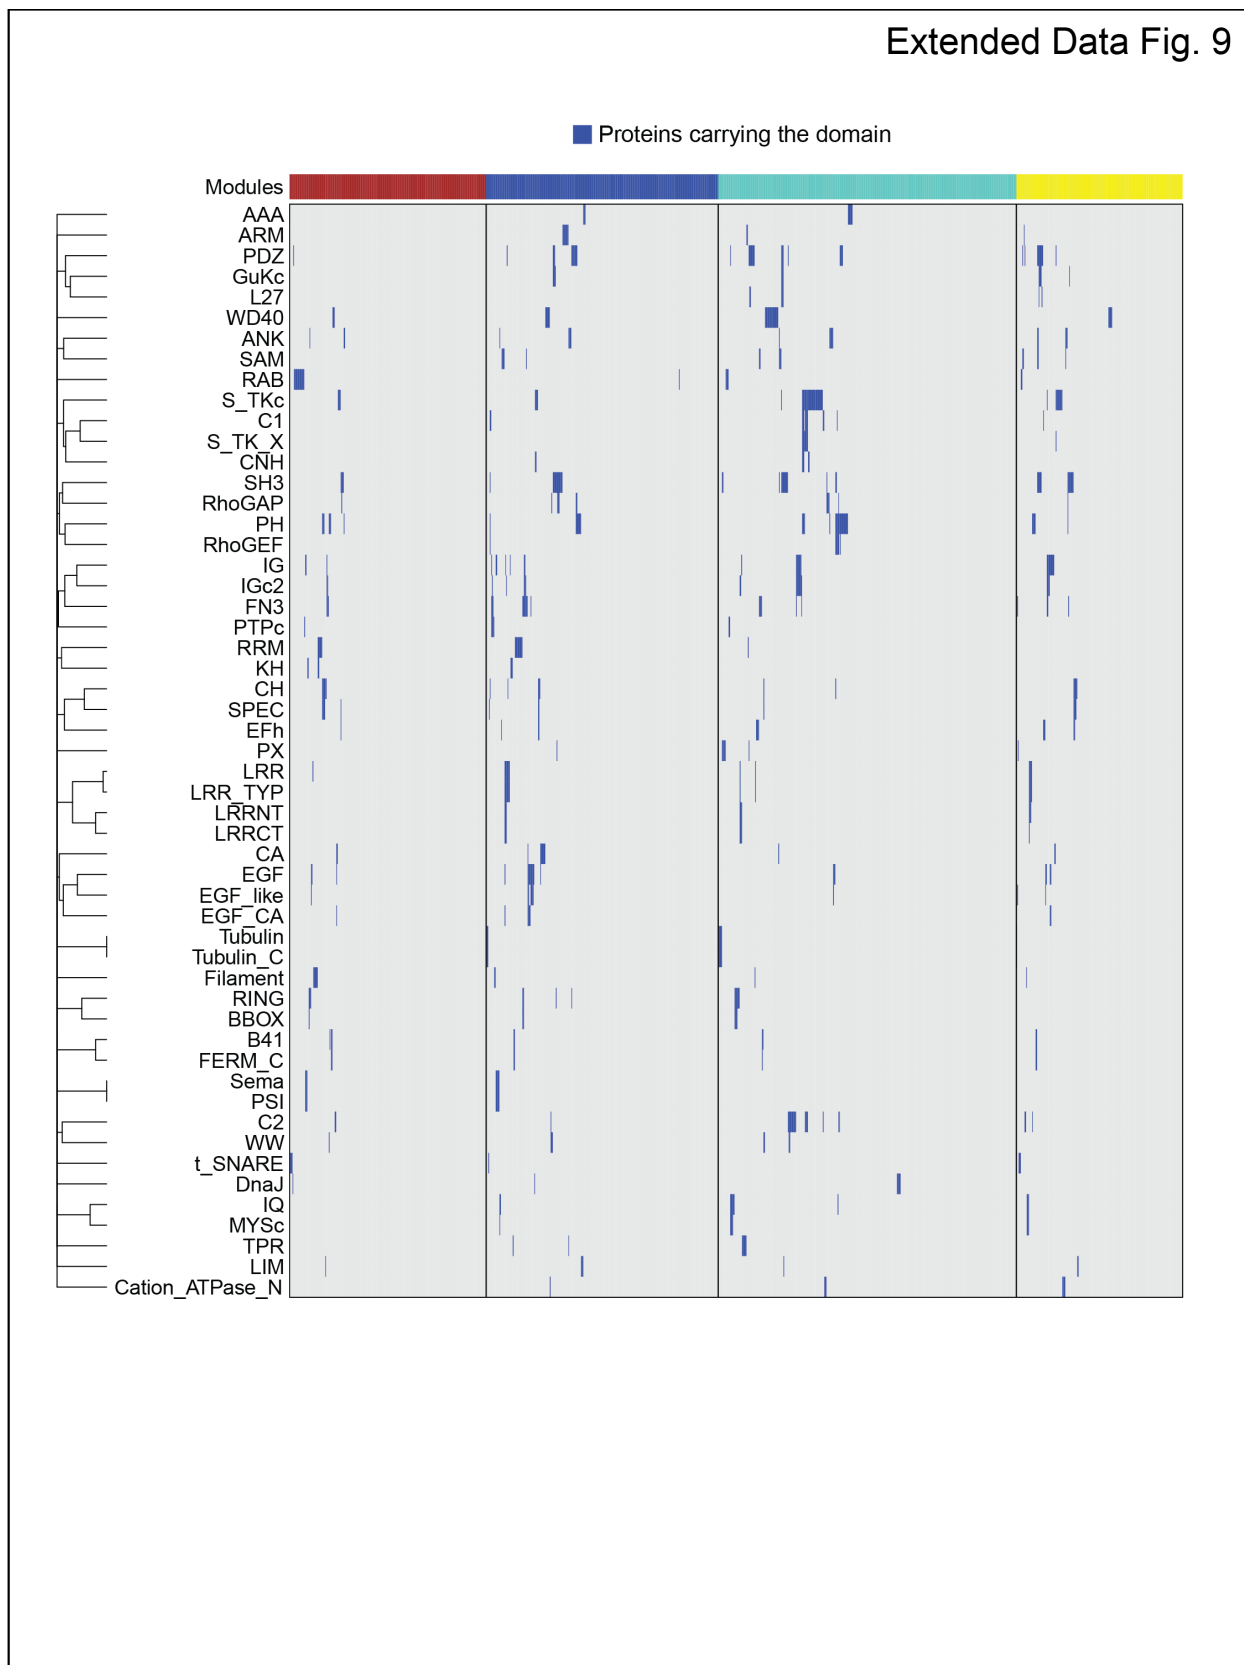

## **Extended Data Fig. 9 | Protein domains in individual PSD proteins.**

The rows are clustered based on the Jaccard distance.



## Extended Data Fig. 10

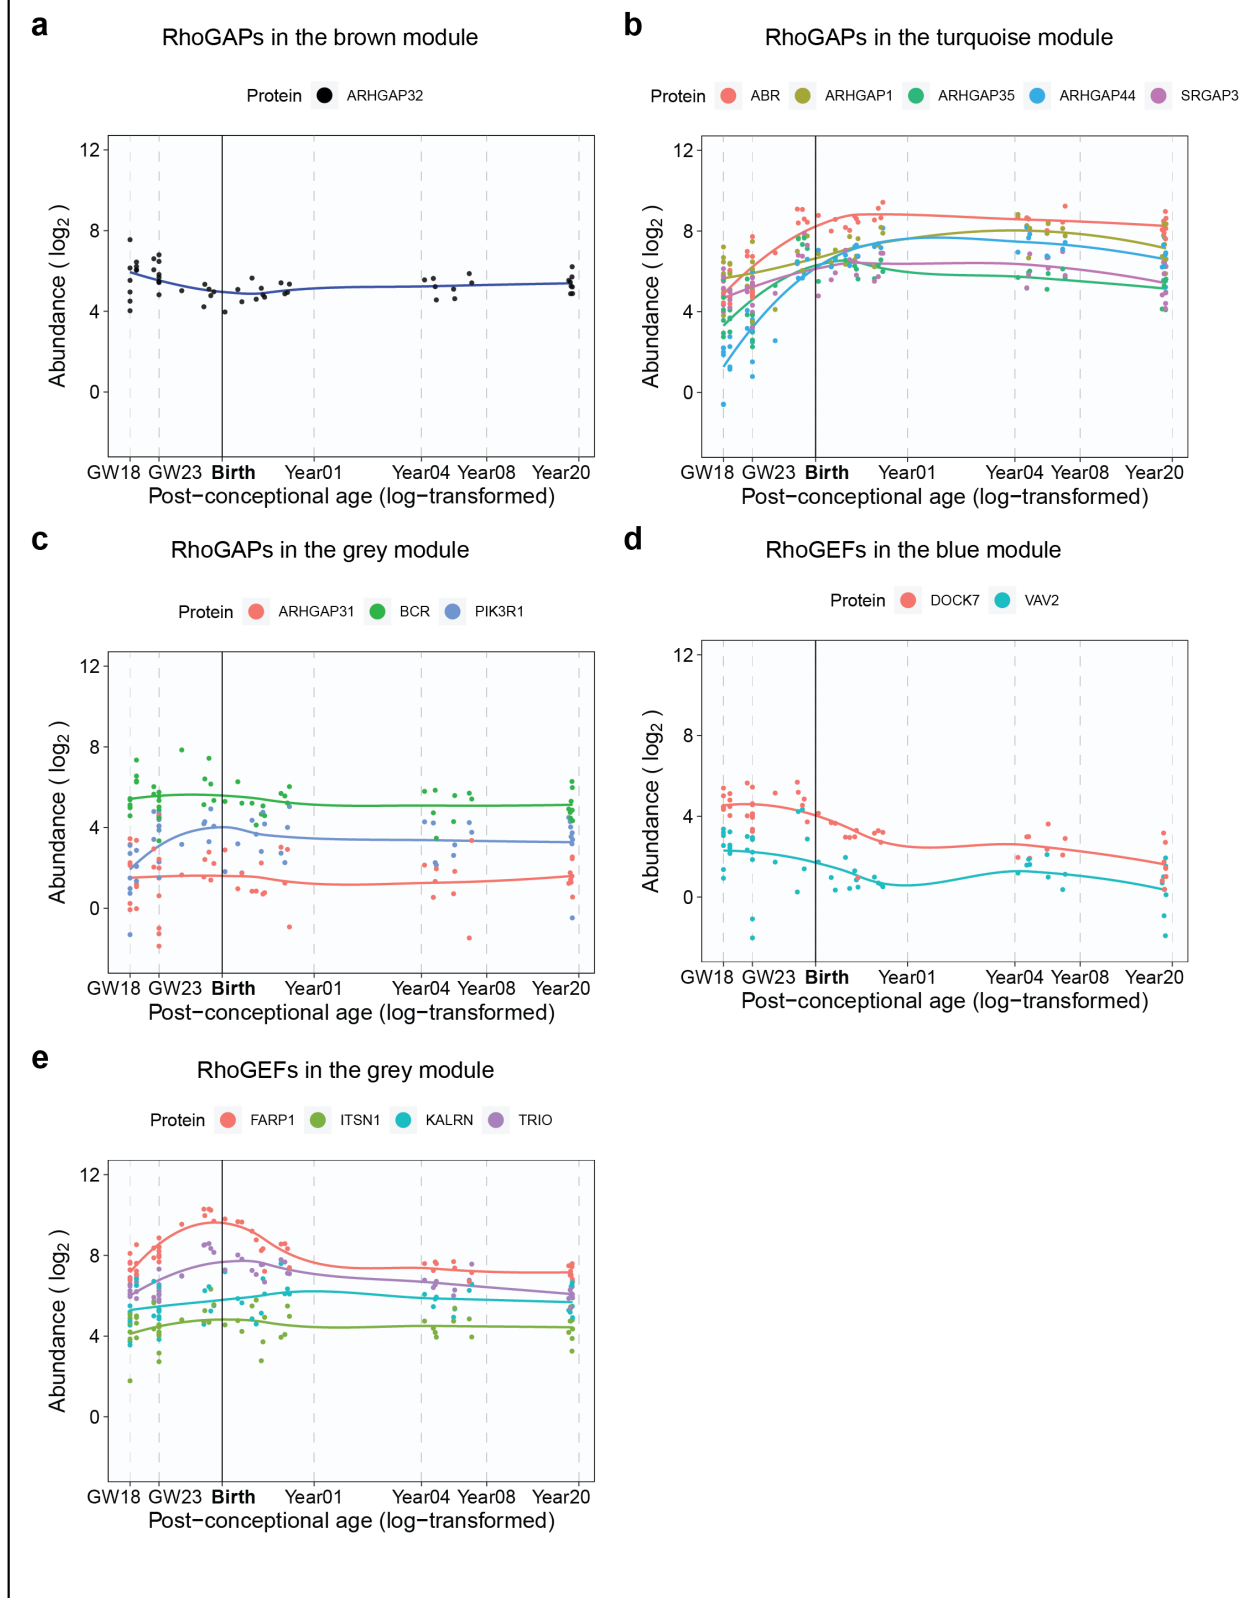

**Extended Data Fig. 10 | Abundance patterns of RhoGAPs and RhoGEFs not listed in Fig. 2f.**

## Extended Data Fig. 11

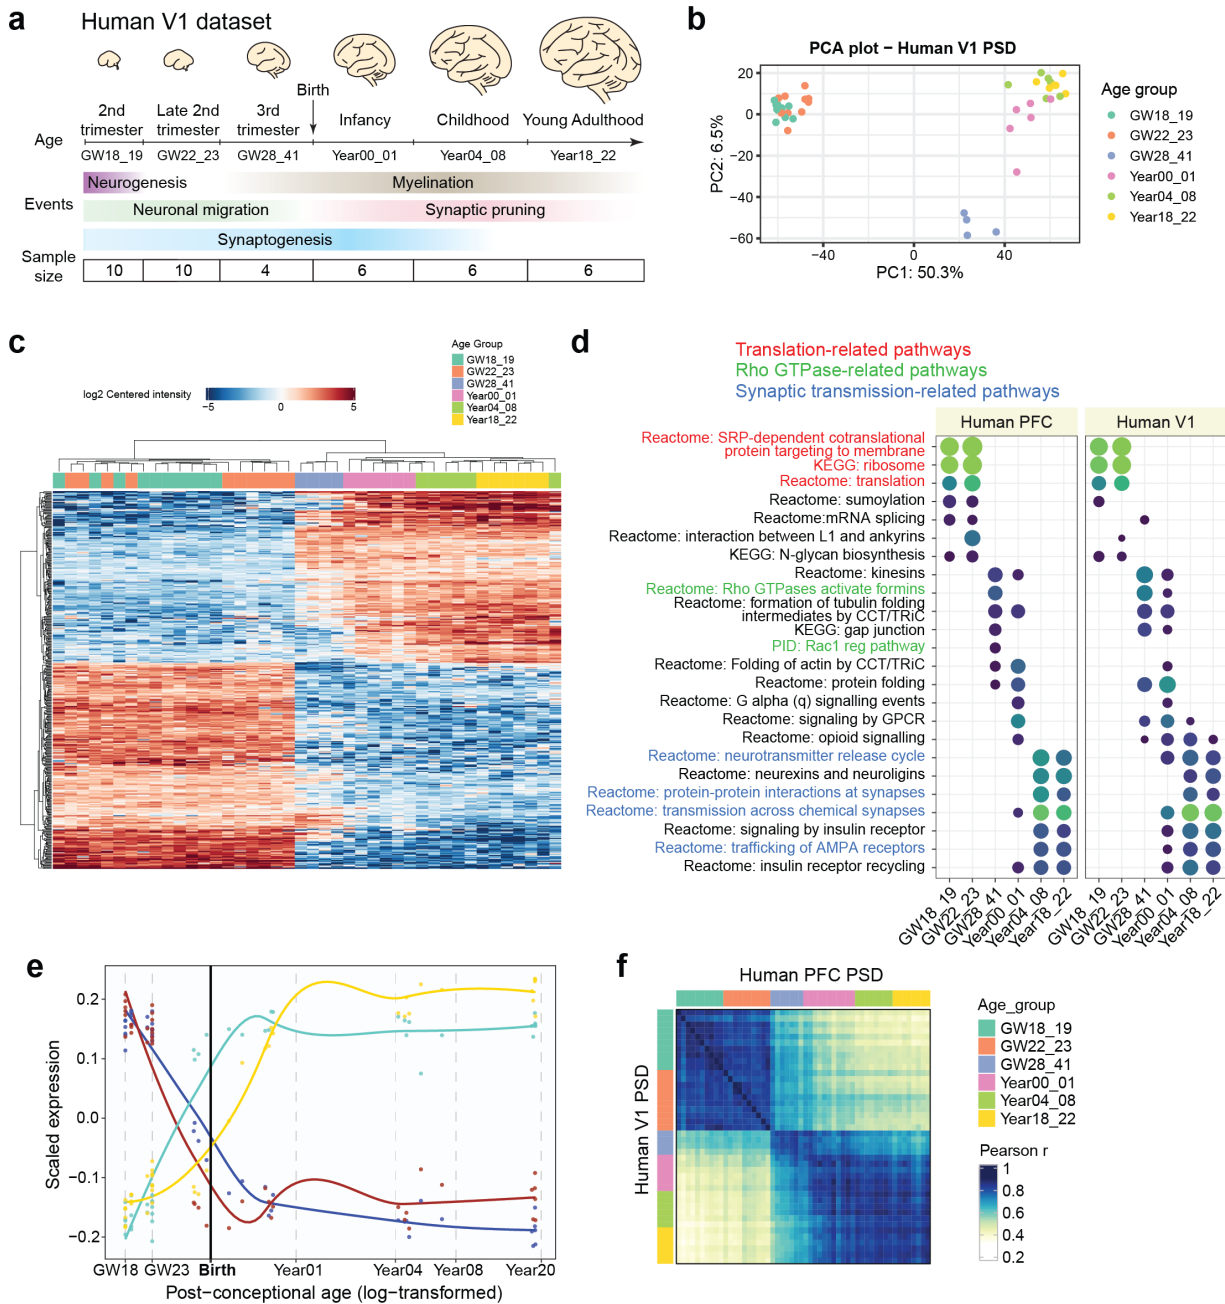

**Extended Data Fig. 11 | Changes in PSD composition during human V1 development. a,** Schematic illustrating the developmental stages of samples in the human V1 dataset. **b,** PCA plots of samples in the human V1 dataset colored by their age groups. **c,** Hierarchical clustering of the samples in the human V1 dataset based on proteins with differential abundance. **d,** Gene set enrichment analysis for individual age groups in the human PFC and V1 dataset. NES: normalized enrichment score. **e,** Scaled abundance patterns (module eigengene values) of four protein modules in the human V1 dataset. **f,** Similarity matrices representing pairwise Pearson correlations between human PFC and human V1 samples.

## Extended Data Fig. 12

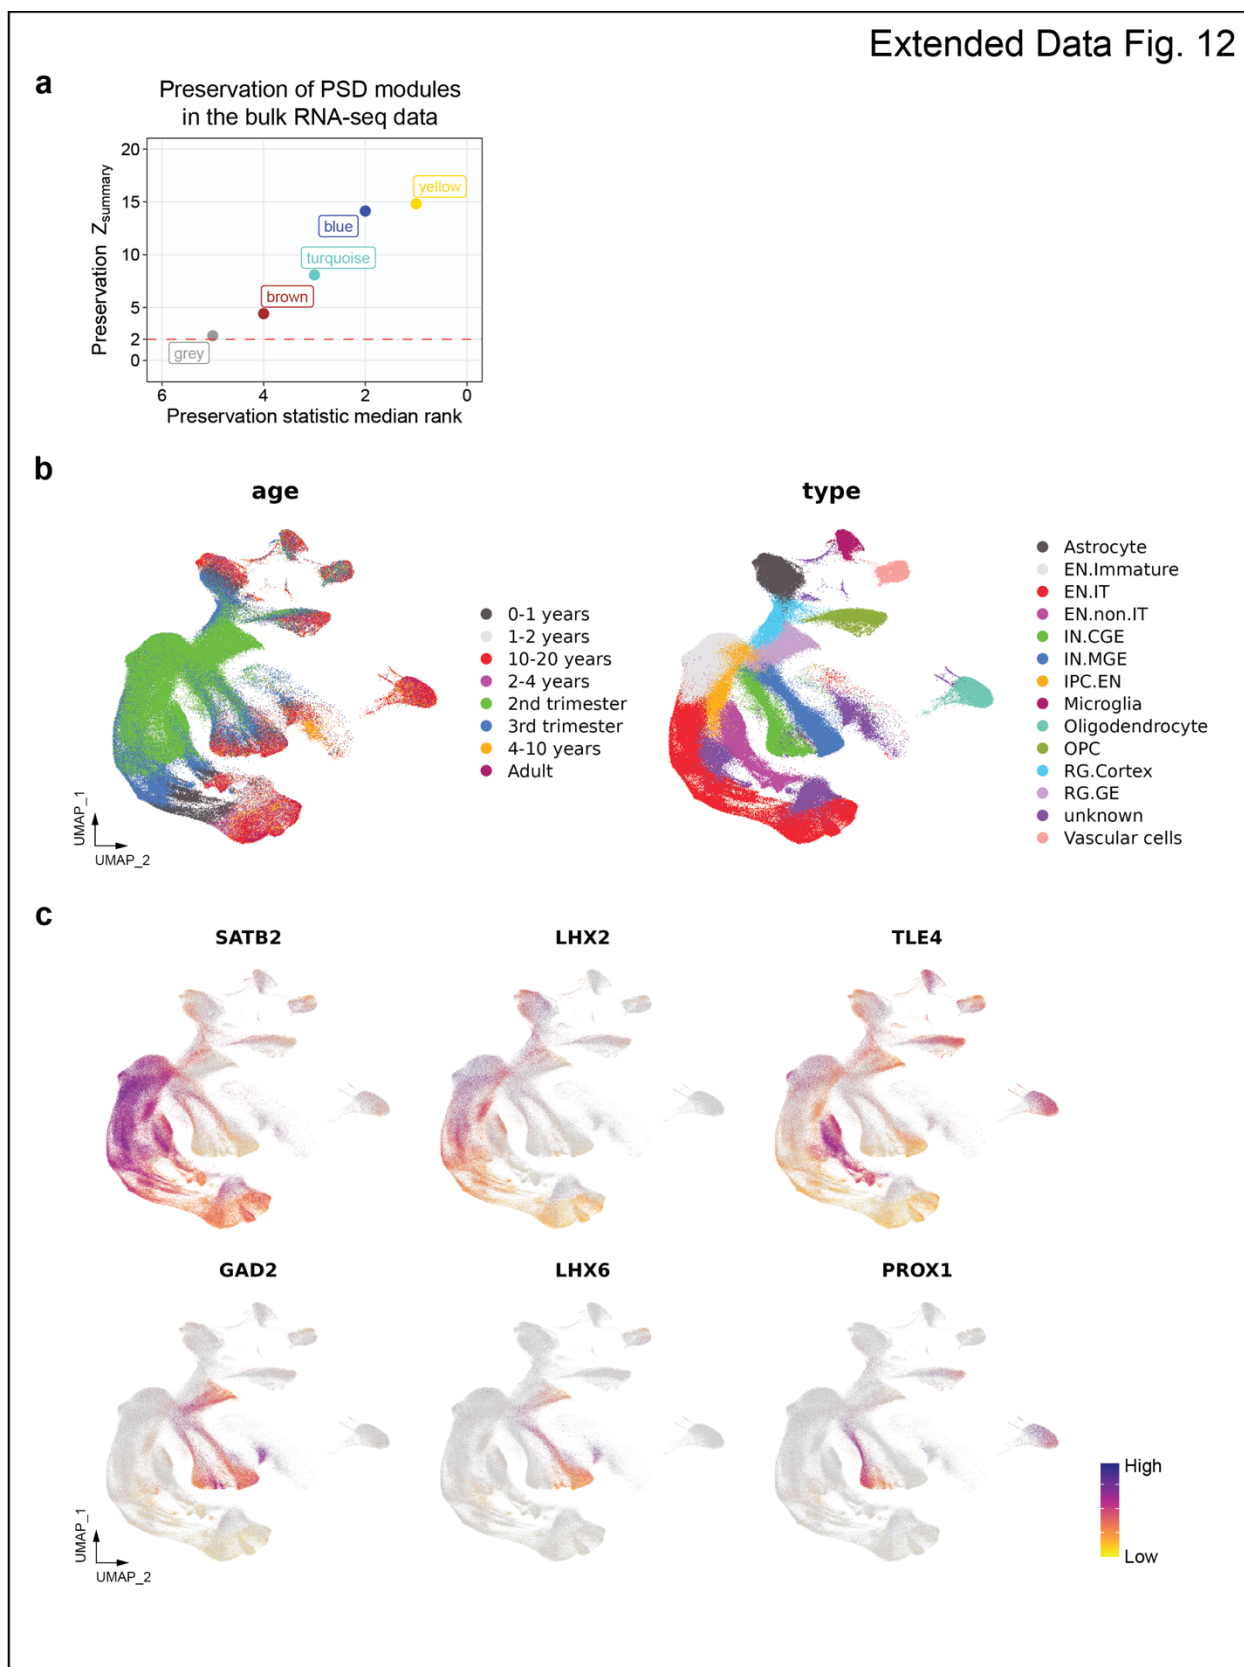

**Extended Data Fig. 12 | Preservation of human PSD modules at the RNA level and overview of the single-nucleus RNA-seq data from the developing human neocortex. a,** Preservation of Human PSD modules in the bulk RNA-seq data. **b,** UMAP plots showing the distribution of age groups and cell types in the single-nucleus RNA-seq data from the developing human neocortex. **c,** UMAP plots showing the expression patterns of neuronal subtype-specific markers in the single-nucleus RNA-seq data from the developing human neocortex.

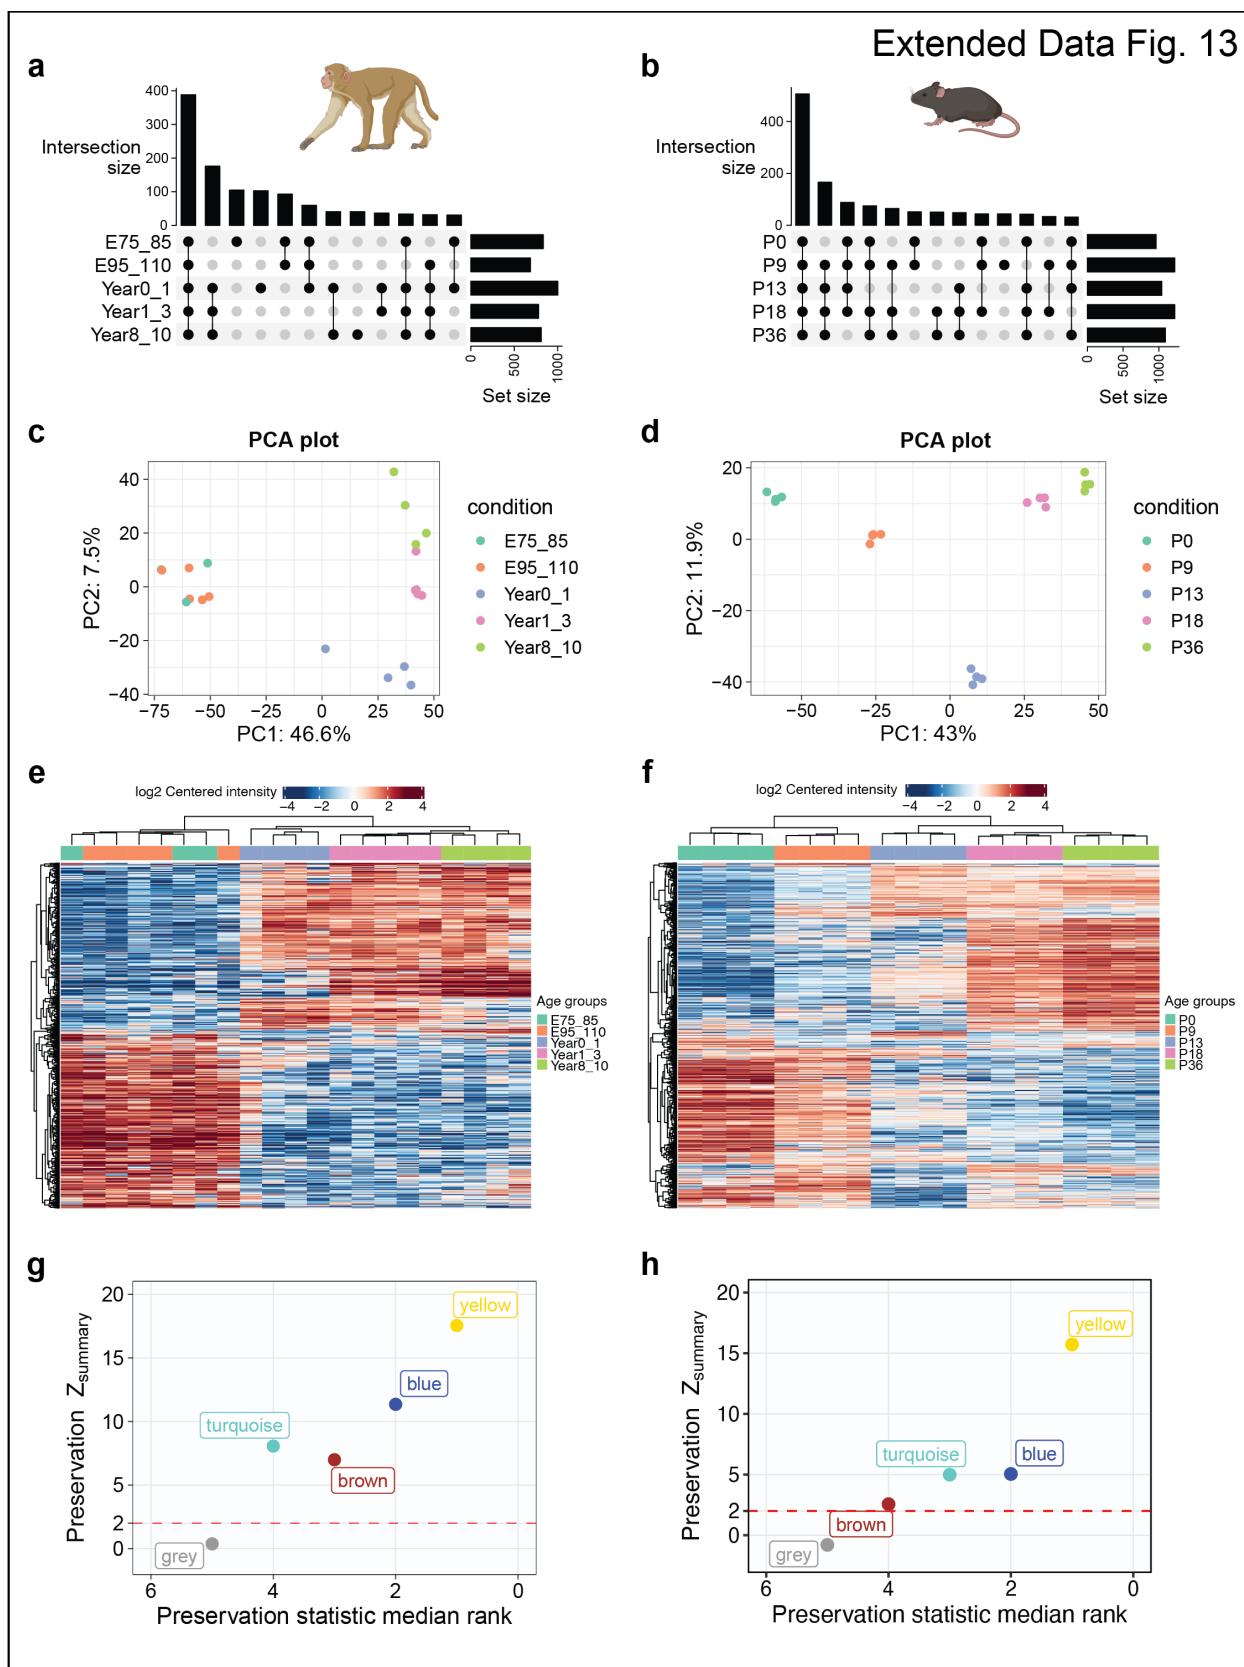

**Extended Data Fig. 13 | Changes in PSD composition during macaque and mouse neocortical development.** **a**, UpSet plot describing the number of identified proteins and their overlaps at each age group of the macaque dataset. **b**, UpSet plot describing the number of identified proteins and their overlaps at each age group of the mouse dataset. **c**, PCA plots of the macaque samples colored by various covariates. **d**, PCA plots of the mouse samples colored by various covariates. **e**, Hierarchical clustering of the macaque samples based on proteins with differential abundance. **f**, Hierarchical clustering of the mouse samples based on proteins with differential abundance. **g**, Preservation of Human PSD modules in the macaque PSD proteomic data. **h**, Preservation of Human PSD modules in the mouse PSD proteomic data.



## Extended Data Fig. 14

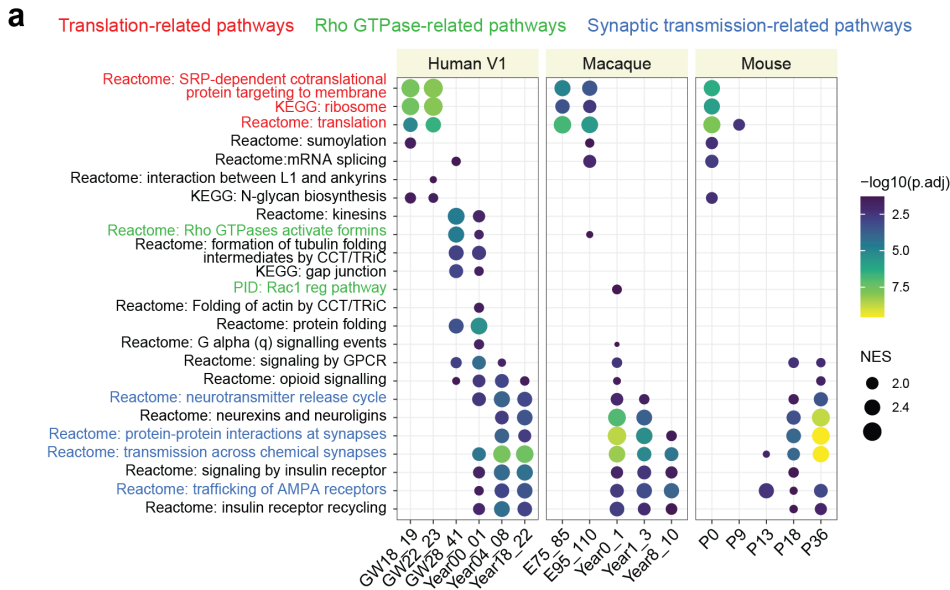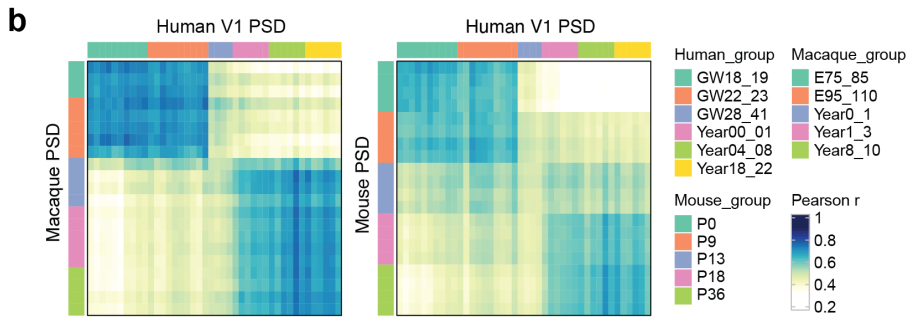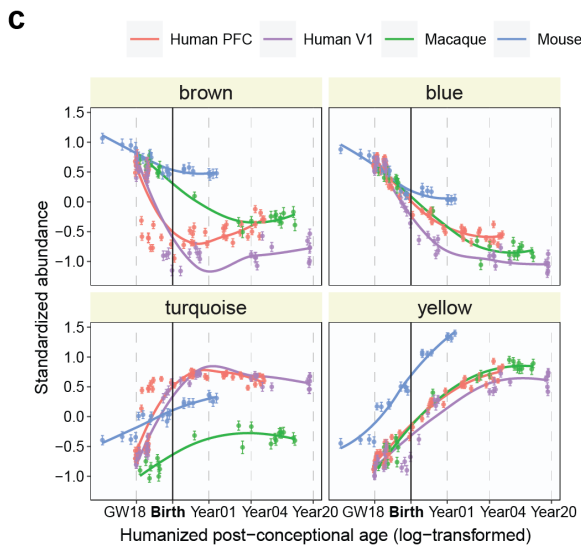

**Extended Data Fig. 14 | Comparison of PSD development across the human V1, macaque, and mouse datasets.** **a**, Gene set enrichment analysis for individual age groups across datasets. NES: normalized enrichment score. **b**, Similarity matrices representing pairwise Pearson correlations between human V1, macaque, and mouse samples. **c**, Standardized abundance patterns of proteins in the four PSD modules across regions and species along the humanized age based on the human V1 dataset.

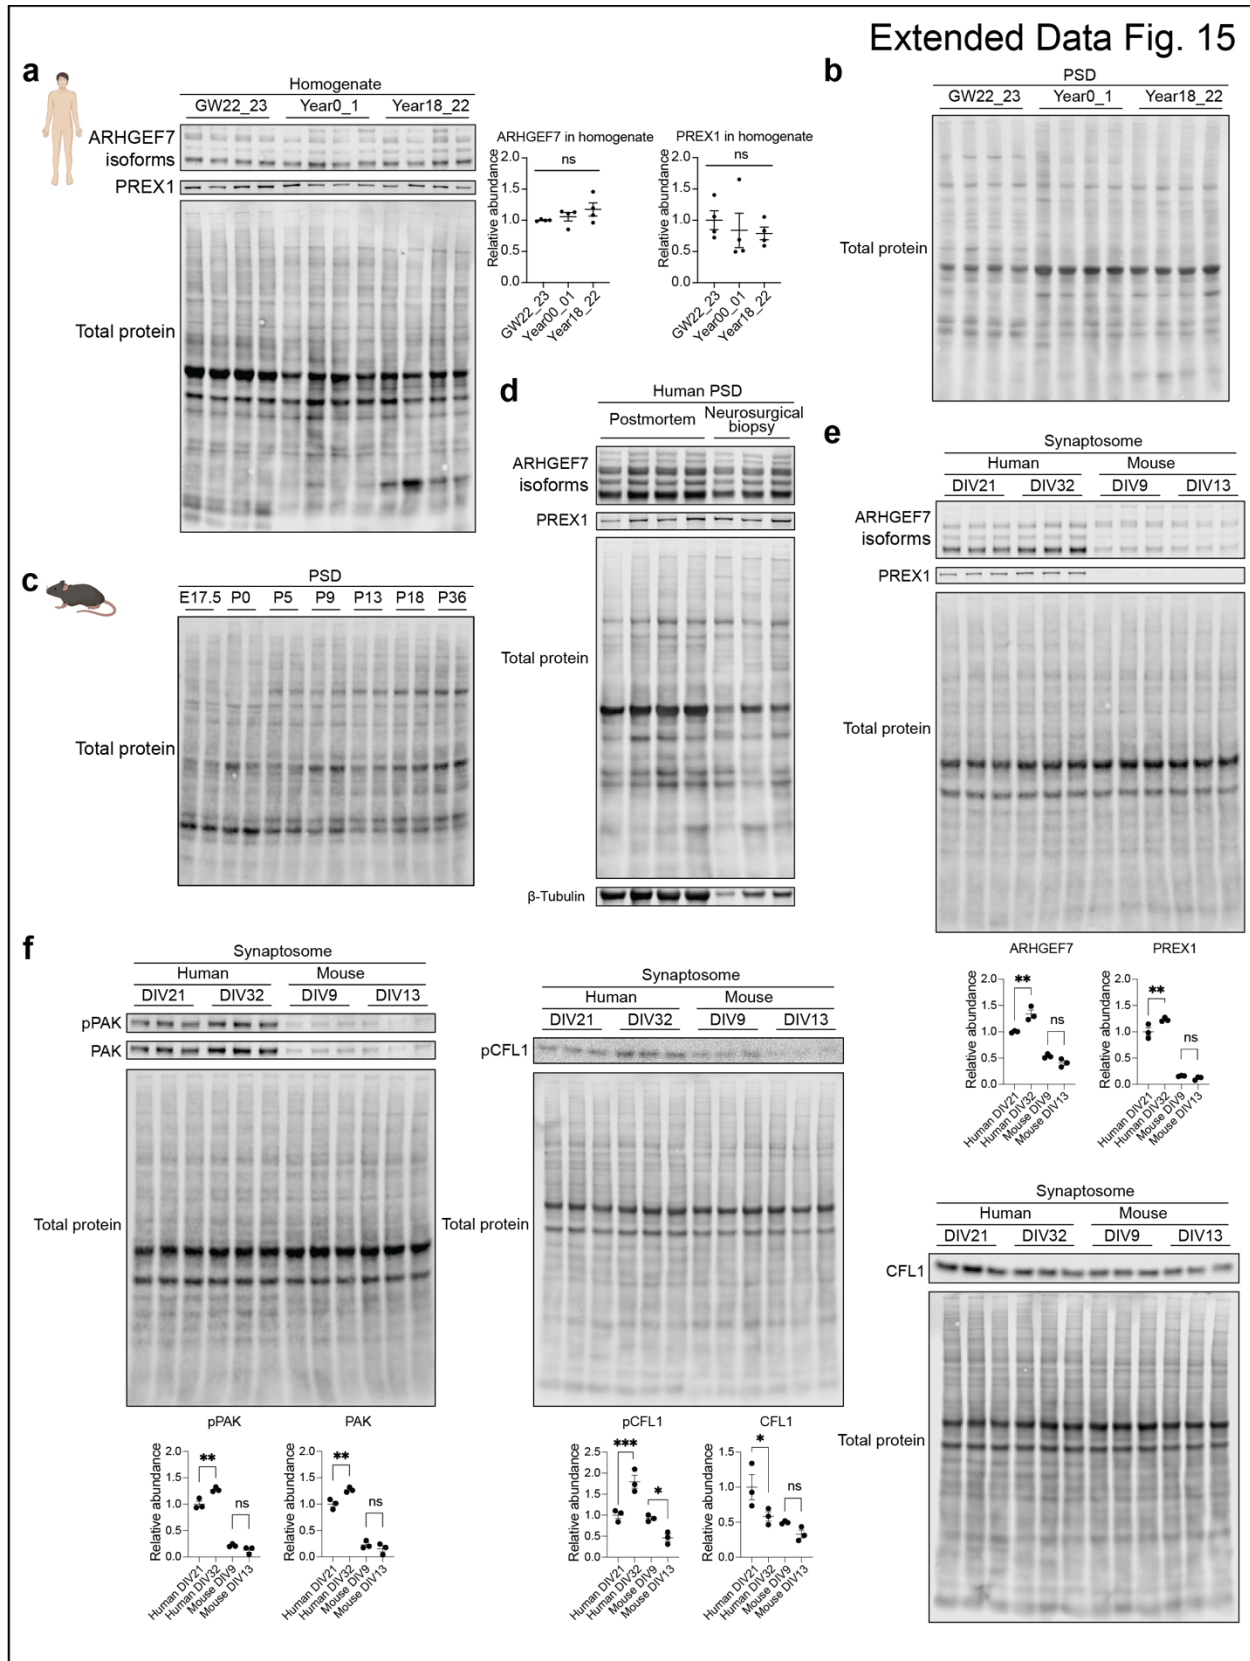

**Extended Data Fig. 15 | RhoGEF levels and activities during synapse development. a,** Immunoblots and quantification of representative RhoGEFs in the whole homogenate of the developing human (n = 4, 4, 4 samples) and mouse (n = 2, 2, 2, 2, 2, 2, 2 samples) PSD. One-way ANOVA with Holm-Sidak's multiple comparisons test. **b,** Total protein staining for blots of the human PSD in Fig. 5b. **c,** Total protein staining for blots of the mouse PSD in Fig. 5b. **d,** Comparison of adult PSD samples from postmortem brain tissues and neurosurgical biopsy tissues by western blot analysis. **e,** Immunoblots and quantification of representative RhoGEFs in the synaptosomes of cultured primary human (n = 3, 3 samples) and mouse cortical neurons (n = 3, 3 samples). \*\*p < 0.01; one-way ANOVA with Holm-Sidak's multiple comparisons test. **f,** Immunoblots and quantification of PAK and CFL activities in the synaptosomes of cultured primary human (n = 3, 3 samples) and mouse cortical neurons (n = 3, 3 samples). \*p < 0.05, \*\*p < 0.01, \*\*\*p < 0.001; one-way ANOVA with Holm-Sidak's multiple comparisons test.

Extended Data Fig. 16

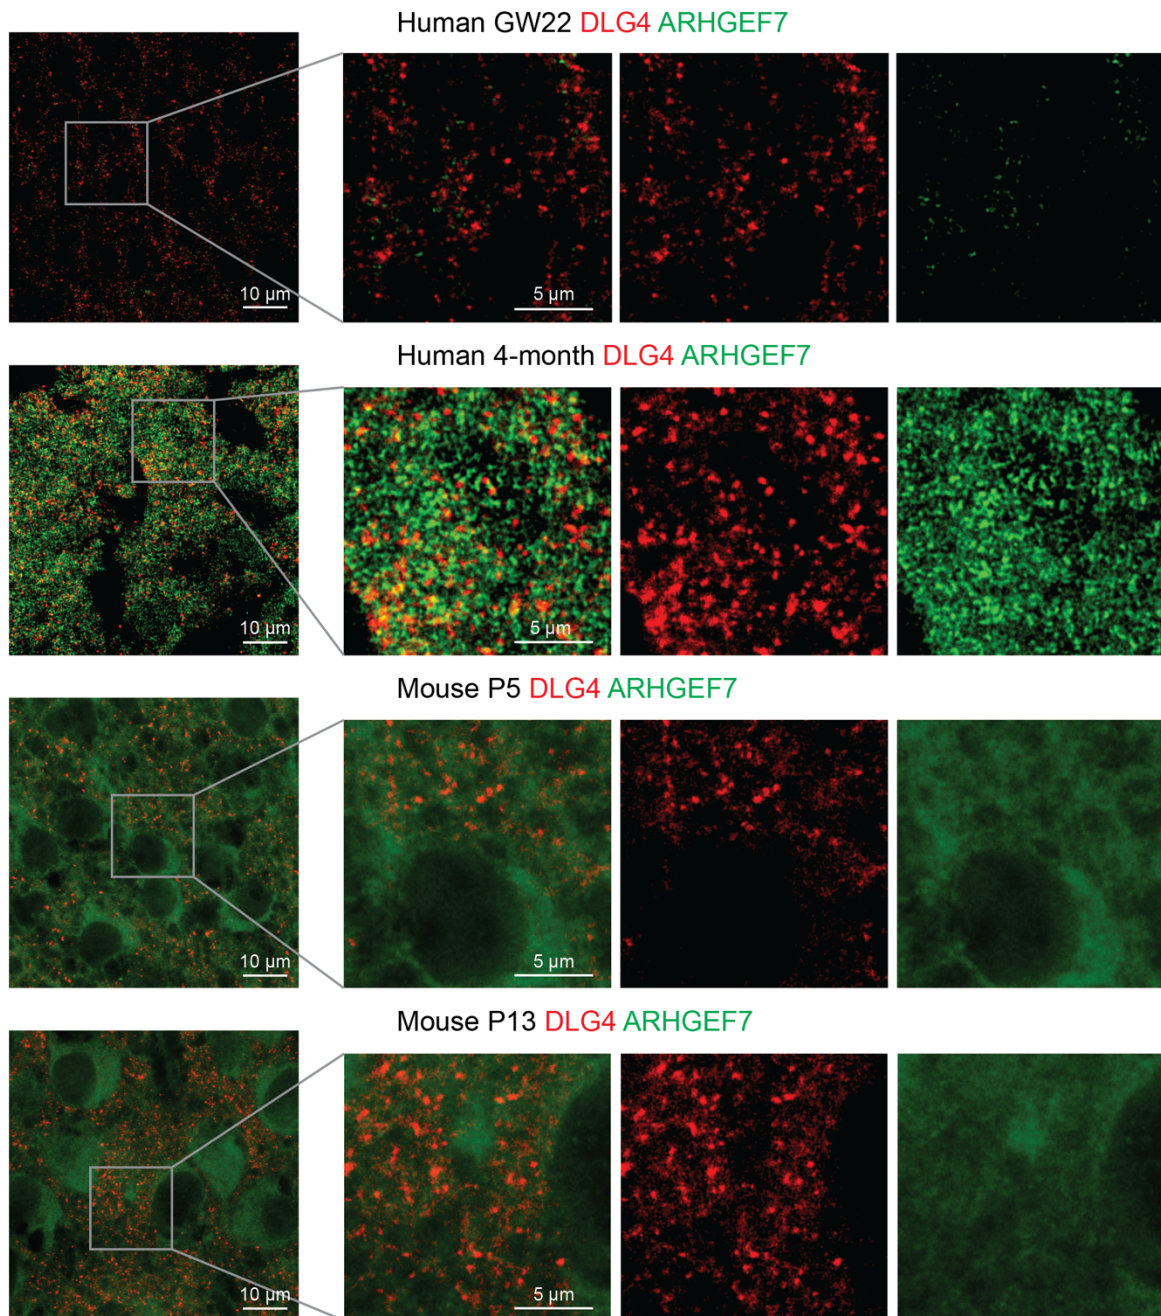

**Extended Data Fig. 16 | Quantification of ARHGEF7 in the PSD of the human or mouse neocortex.** Colocalization of ARHGEF7 with DLG4 in the GW22 human, 4-month human, postnatal day 5 mouse (c), and postnatal day 13 mouse neocortex (scale bar: 10  $\mu\text{m}$  or 5  $\mu\text{m}$  as indicated in the figure).

### Extended Data Fig. 17

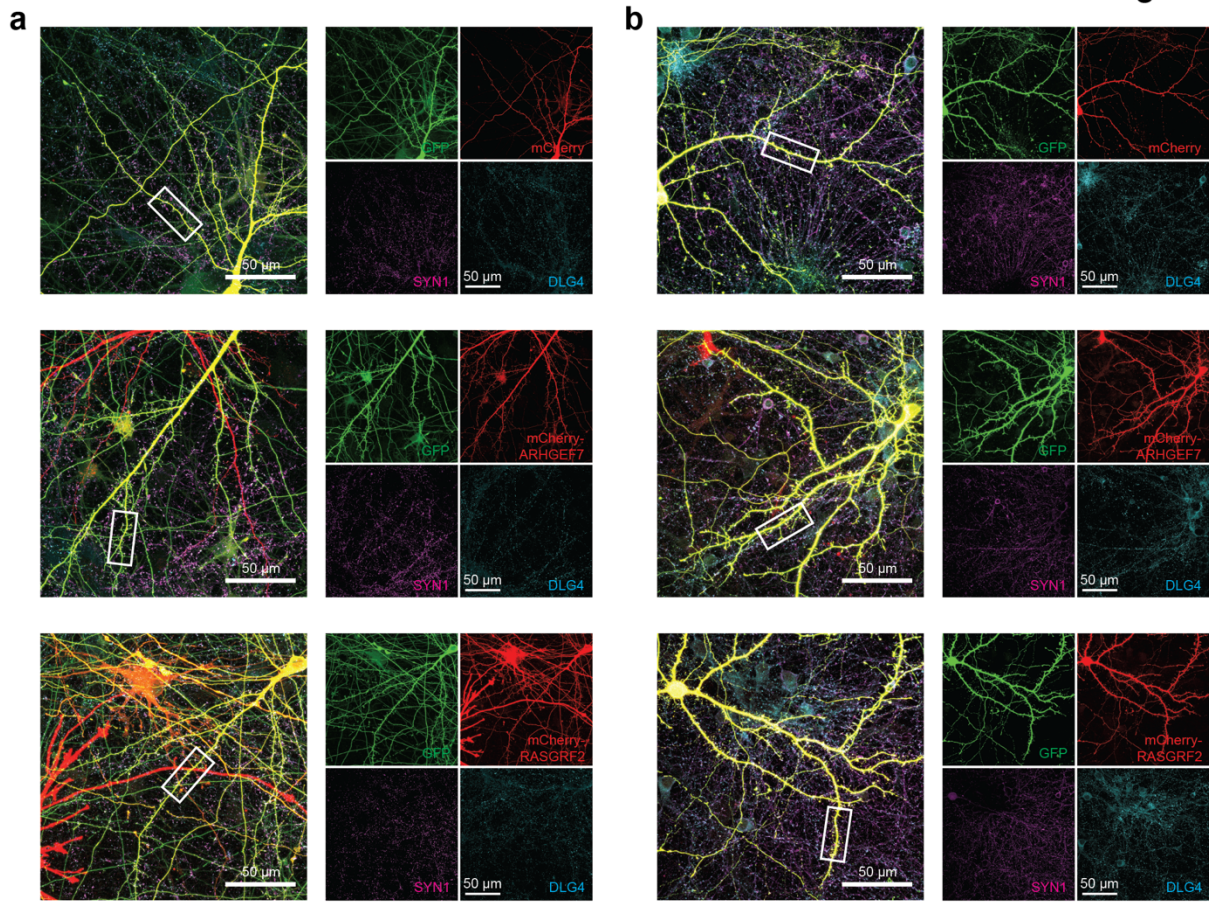

**Extended Data Fig. 17 | RhoGEF overexpression alters dendritic spine morphogenesis in human and mouse cortical neurons.** **a**, Original immunofluorescence images of Fig. 5d. Immunostaining of primary human cortical neurons cultured six weeks *in vitro* transfected with mEGFP-C1 and vectors expressing mCherry, mCherry-ARHGEF7, or mCherry-RASGRF2 (scale bar: 50  $\mu\text{m}$ ). **b**, Original immunofluorescence images of Fig. 5e. Immunostaining of primary mouse cortical neurons cultured 8 days *in vitro* transfected with mEGFP-C1 and vectors expressing mCherry, mCherry-ARHGEF7, or mCherry-RASGRF2 (scale bar: 50  $\mu\text{m}$ ).



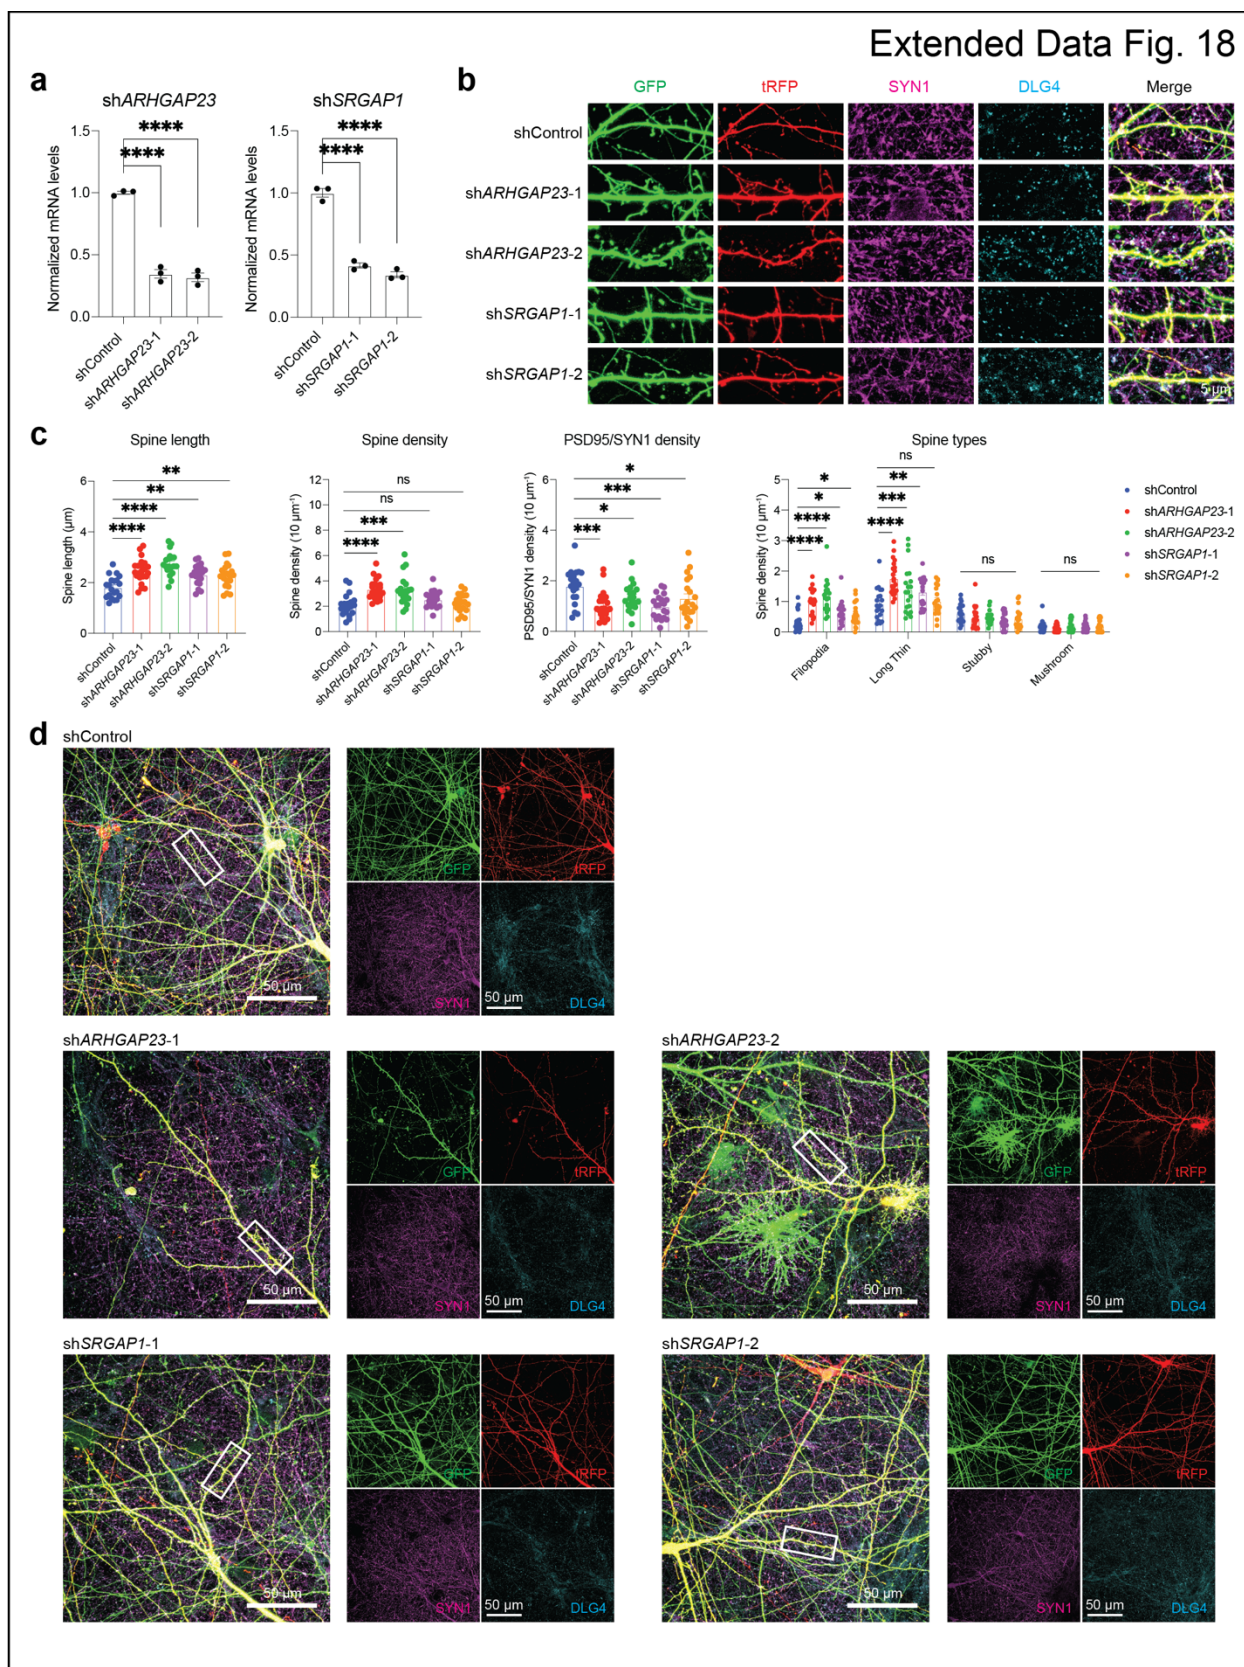

**Extended Data Fig. 18 | Decrease in selective RhoGAP proteins partially phenocopies RhoGEF overexpression in dendritic spine morphogenesis of human cortical neurons. a,** Quantification of mRNA levels of *ARHGAP23* and *SRGAP1* in HEK293T cells transfected with control shRNAs (shControl), two shRNAs targeting *ARHGAP23* (sh*ARGGAP23*-1 and sh*ARGGAP23*-2), or two shRNAs targeting *SRGAP1* (sh*SRGAP1*-1 and sh*SRGAP1*-2). \*\*\*\* $p < 0.0001$ ; one-way ANOVA with Holm-Sidak's multiple comparisons test. **b,c,** Immunostaining of dendrites from primary human cortical neurons cultured six weeks *in vitro* transfected with mEGFP-C1 and vectors co-expressing turbo-RFP (tRFP) and shControl, sh*ARGGAP23*-1, sh*ARGGAP23*-2, sh*SRGAP1*-1 or sh*SRGAP1*-2 (n = 20, 22, 20, 20, 20 neurons, scale bar: 5  $\mu\text{m}$ ). \* $p < 0.05$ , \*\* $p < 0.01$ , \*\*\* $p < 0.001$ , \*\*\*\* $p < 0.0001$ ; one-way ANOVA with Holm-Sidak's multiple comparisons test. **d,** Original immunofluorescence images of Extended Data Fig. 18b (scale bar: 50  $\mu\text{m}$ ).

Extended Data Fig. 19

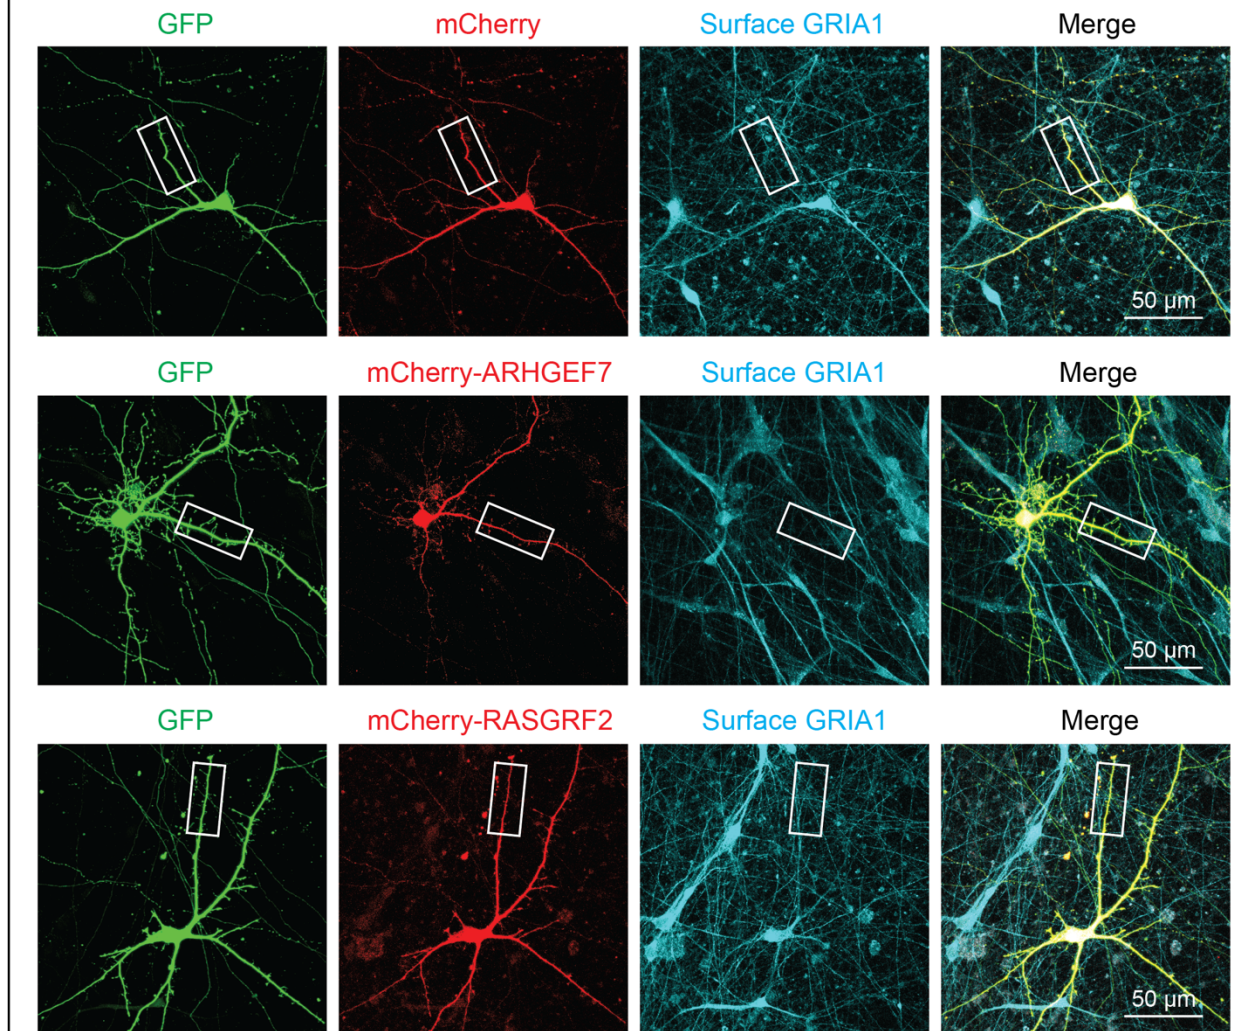

**Extended Data Fig. 19 | RhoGEF overexpression alters surface  $\alpha$ -amino-3-hydroxy-5-methyl-4-isoxazolepropionic acid (AMPA) receptor levels in human neurons.** Original immunofluorescence images of Fig. 5g. Immunostaining against surface GRIA1 of primary human cortical neurons cultured six weeks *in vitro* transfected with mEGFP-C1 and vectors expressing mCherry, mCherry-ARHGEF7, or mCherry-RASGRF2 (scale bar: 50  $\mu$ m).

Extended Data Fig. 20

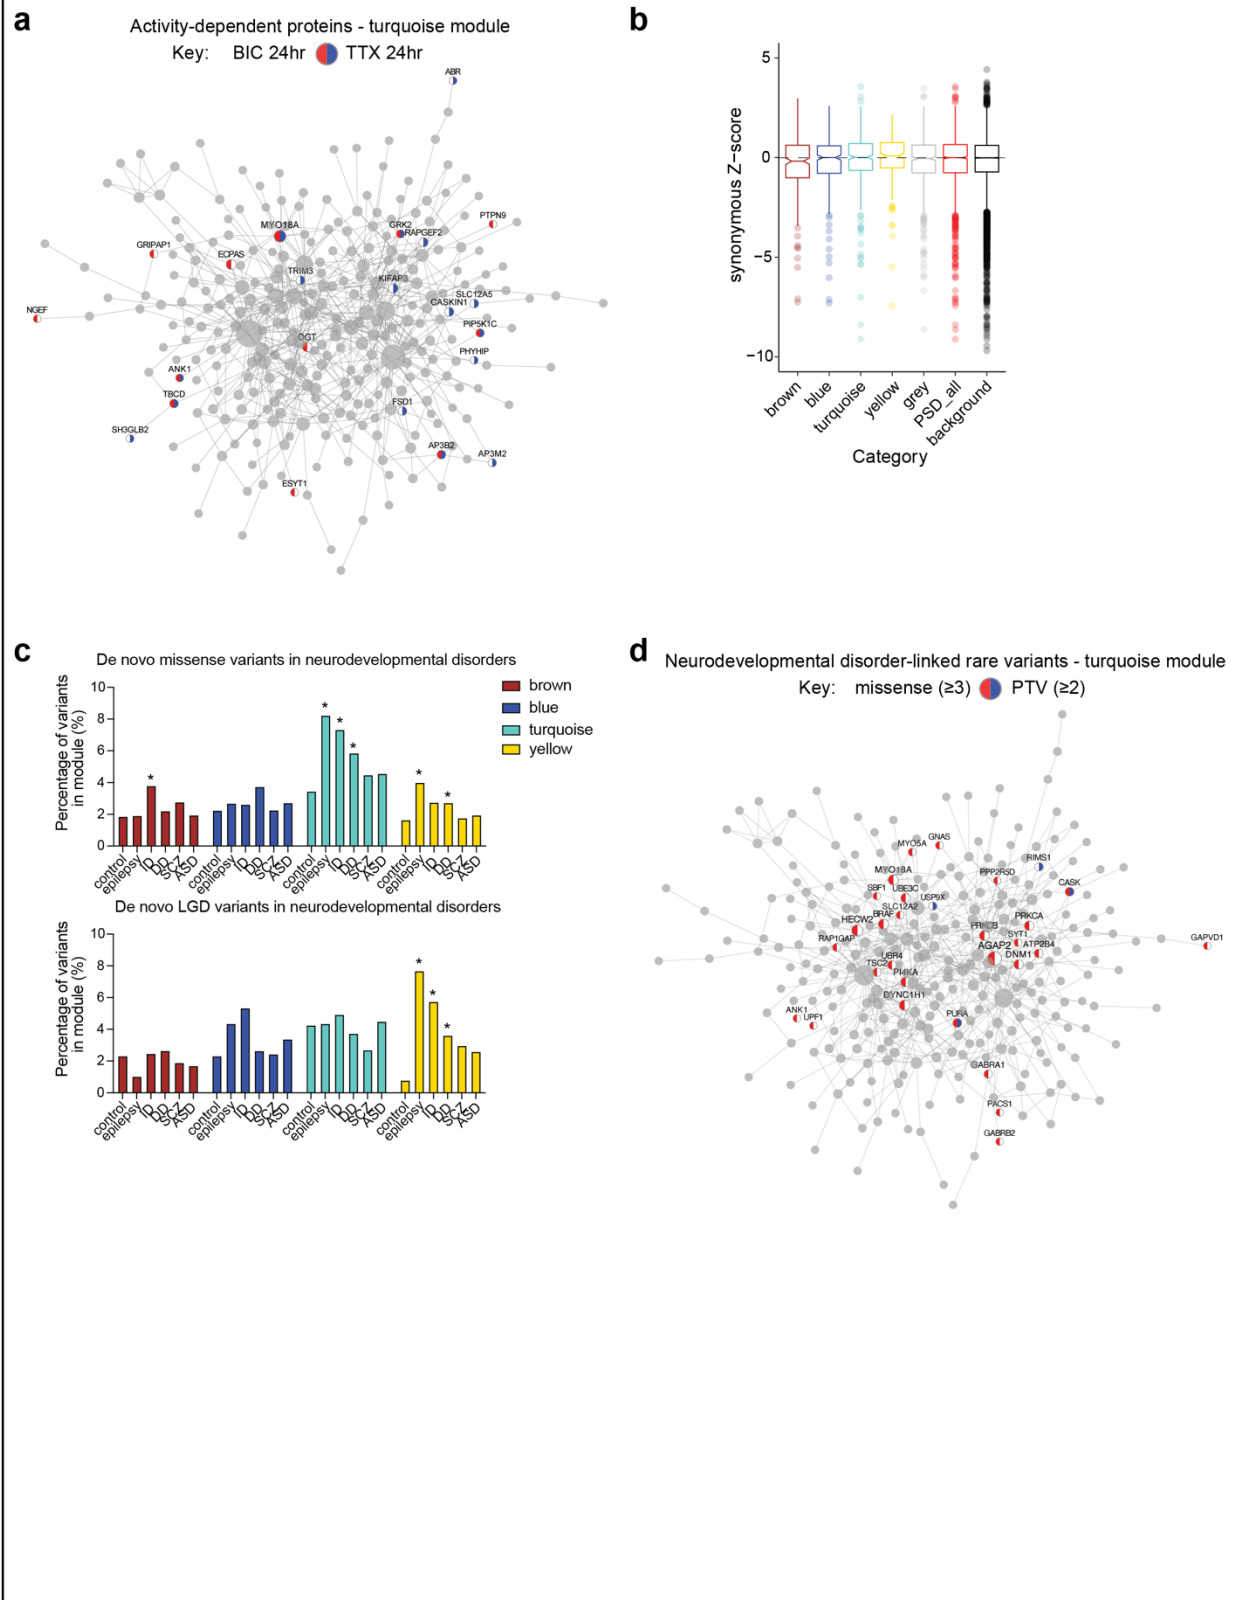

**Extended Data Fig. 20 | Association of PSD modules with cognitive functions and neurodevelopmental disorders.** **a**, PPI-co-abundance network of the turquoise module with activity-dependent proteins highlighted. **b**, Distribution of gnomAD synonymous Z-scores of genes in each category. **c**, Percentage of rare variants located at PSD module genes in subjects with or without neurodevelopmental disorders. The asterisks denote statistically significant differences from the control group (\*,  $p < 0.05$ ; hypergeometric test). **d**, PPI-co-abundance network of the turquoise module with genes carrying neurodevelopmental disorder-linked (at least 3) *de novo* missense variants or (at least 2) PTVs highlighted.

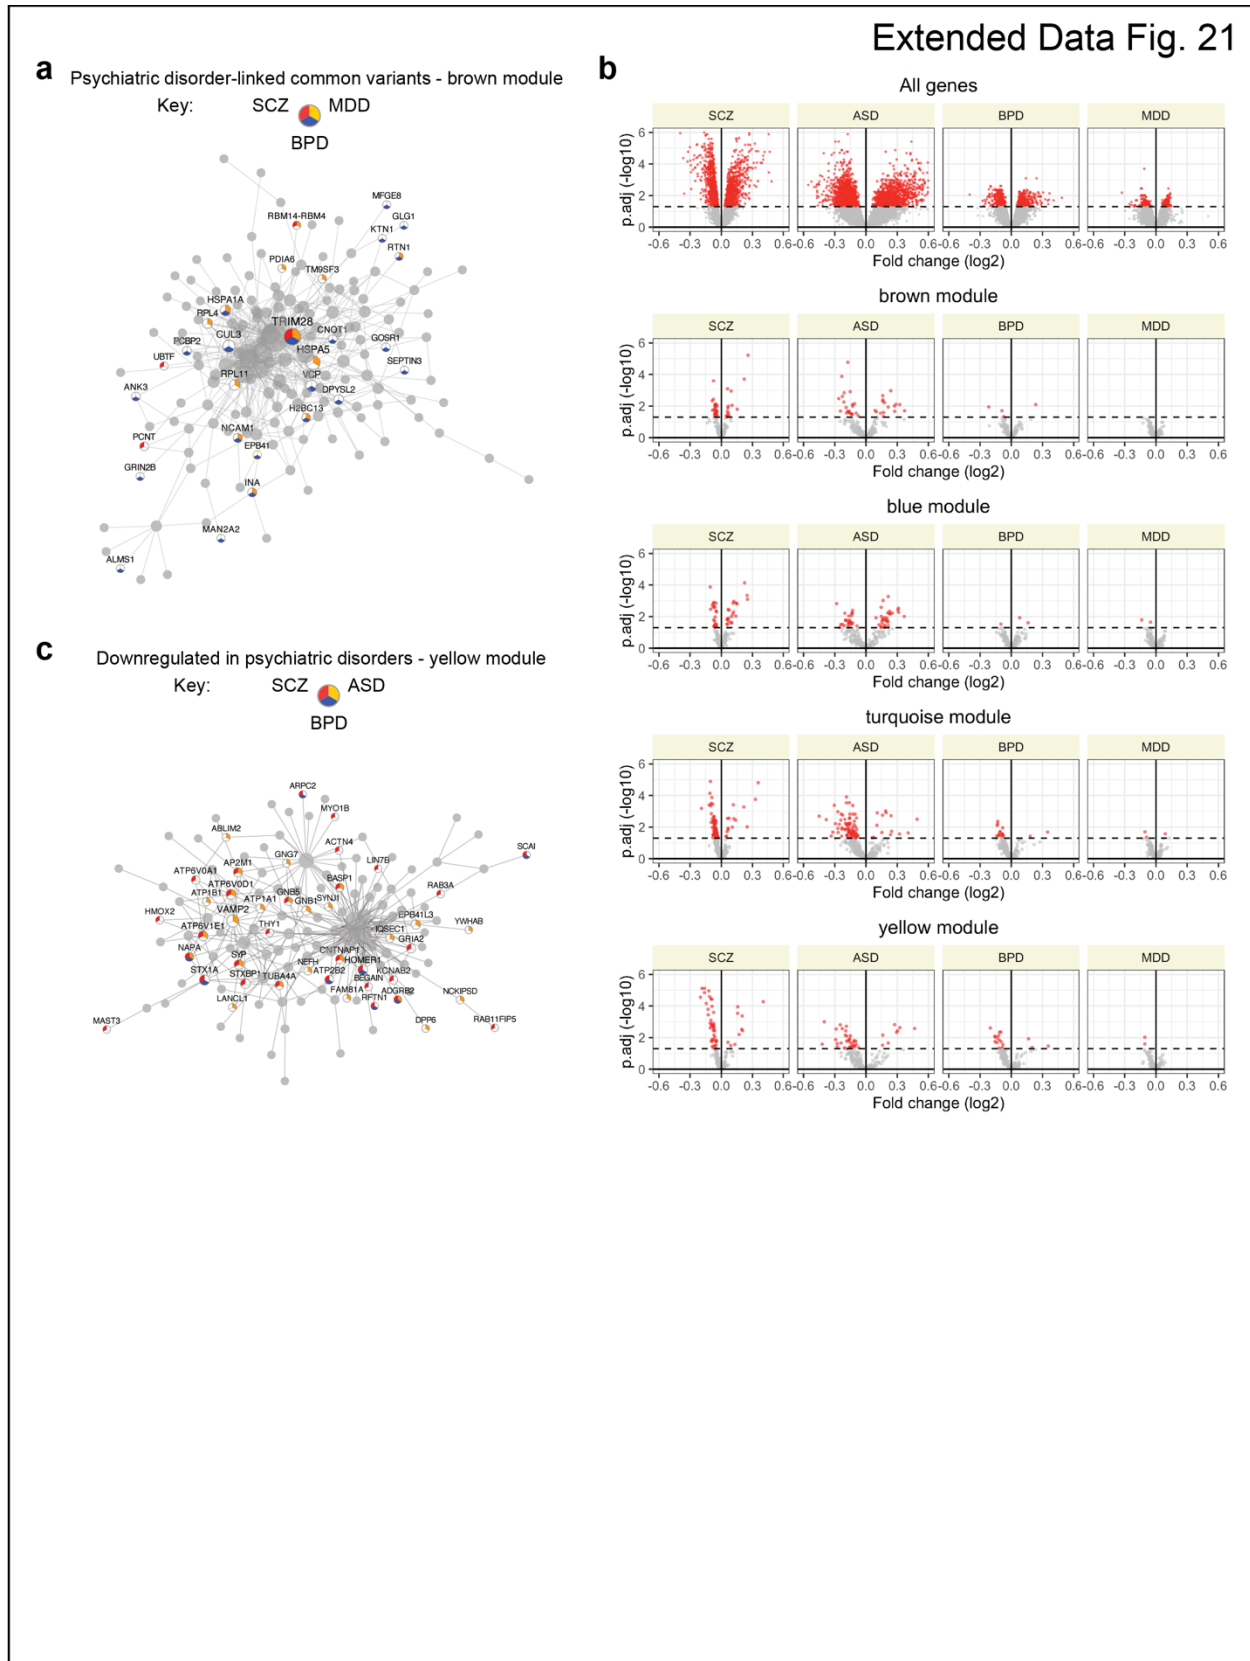

**Extended Data Fig. 21 | Association of PSD modules with psychiatric disorders. a**, PPI-co-abundance network of the brown module with genes carrying psychiatric disorder-linked common variants highlighted. **b**, Volcano plots for misexpressed genes after the onset of psychiatric disorders in PSD modules. **c**, PPI-co-abundance network of the yellow module with genes downregulated in psychiatric disorders highlighted.
